# Supplementary material for: Four-component defluorinative reaction of allylic fluorides, amidines, and Cs2CO3under transition-metal-free conditions
Source: Royal Society of Chemistry journal article supplement (doi:10.1039/d2gc02045a), 2022-01-01

## Supporting Information

### Four-Component Defluorinative Reaction of Allylic Fluorides, Amidines, and Cs<sub>2</sub>CO<sub>3</sub> under Transition-Metal-Free Conditions

Yu-Lan Chen,<sup>a</sup> Li-Wen Sun,<sup>a</sup> Jia-Wei Chen,<sup>a</sup> Ming-Quan Zhu,<sup>a</sup> Mengtao Ma,<sup>b</sup> Zhi-Liang Shen,<sup>\*a</sup>

Xue-Qiang Chu<sup>\*a</sup>

<sup>a</sup> *Technical Institute of Fluorochemistry (TIF), Institute of Advanced Synthesis, School of Chemistry and Molecular Engineering, Nanjing Tech University, Nanjing 211816, China.*

<sup>b</sup> *Department of Chemistry and Materials Science, College of Science, Nanjing Forestry University, Nanjing 210037, China.*

### Table of Contents

|                                                                              |          |
|------------------------------------------------------------------------------|----------|
| General information                                                          | Page S2  |
| General procedure for the synthesis of polyfluoroalkylated alkenes <b>1</b>  | Page S2  |
| General procedure for the four-component defluorinative cyclization          | Page S2  |
| General procedure for the scale-up synthesis of product <b>3a</b>            | Page S3  |
| Further transformation of products <b>3aa</b>                                | Page S3  |
| Mechanistic studies                                                          | Page S4  |
| Characterization data for products                                           | Page S5  |
| Reference                                                                    | Page S19 |
| The X-ray crystal structure of product <b>3ac</b>                            | Page S19 |
| <sup>1</sup> H, <sup>19</sup> F, and <sup>13</sup> C NMR spectra of products | Page S21 |

## General information

Unless otherwise stated, all reagents were purchased from commercial suppliers and used without further purification. All reactions were carried out under N<sub>2</sub> atmosphere using undistilled solvent. Melting points were recorded on an electrothermal digital melting point apparatus. IR spectra were recorded on a FT-IR spectrophotometer using KBr optics. <sup>1</sup>H, <sup>19</sup>F, and <sup>13</sup>C NMR spectra were recorded in CDCl<sub>3</sub> on Bruker Avance or Joel 400 MHz spectrometers. The chemical shifts ( $\delta$ ) are reported in ppm and coupling constants ( $J$ ) in Hz. High resolution mass spectra (HRMS) were obtained using a commercial apparatus (ESI source). Column chromatography was generally performed on silica gel (300-400 mesh) and reactions were monitored by thin layer chromatography (TLC) using UV light to visualize the course of the reactions.

## General procedure for the synthesis of polyfluoroalkylated alkenes 1<sup>[1]</sup>

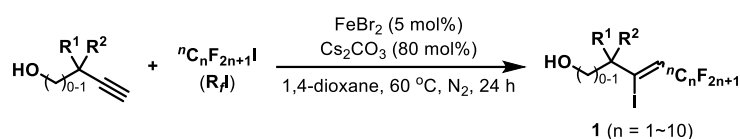

According to Hu's reported method, a solution of FeBr<sub>2</sub> (53.9 mg, 0.25 mmol), Cs<sub>2</sub>CO<sub>3</sub> (1303 mg, 4 mmol), alkyne (5 mmol), and perfluoroalkyl iodide (7.5 mmol) in anhydrous 1,4-dioxane (20 mL) was stirred at 60 °C under N<sub>2</sub> for 24 h. The reaction was then quenched by saturated NH<sub>4</sub>Cl solution (50 mL) and extracted with EtOAc (50 mL x 3). The organic layer was washed with saturated brine twice, dried over MgSO<sub>4</sub>, and concentrated under reduced pressure. The crude product was purified by flash silica gel column chromatography (300-400 mesh) using petroleum ether/ethyl acetate (100/1~80/1) as eluent to afford the pure product **1**.

## General procedure for the four-component defluorinative cyclization

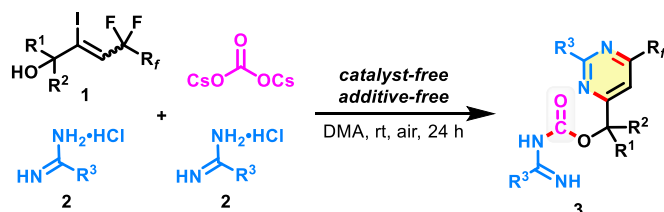

A solution of polyfluoroalkylated alkene **1** (0.3 mmol), amidine **2** (0.75 mmol), and Cs<sub>2</sub>CO<sub>3</sub> (342.1 mg, 1.05 mmol) in DMA (2 mL) was stirred at room temperature under air for 24 h. The reaction was then quenched by saturated NH<sub>4</sub>Cl solution (20 mL) and extracted with EtOAc (20 mL x 3). The organic layer was washed with saturated brine twice, dried over MgSO<sub>4</sub>, and concentrated under reduced pressure. The crude product was purified by flash silica gel column chromatography (300-400 mesh) using petroleum ether/ethyl acetate (10/1~4/1) as eluent to afford the pure products **3**.

## General procedure for the scale-up synthesis of product **3aa**

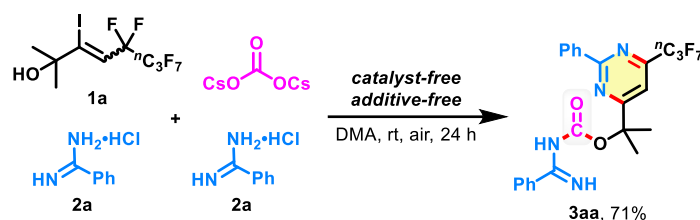

A solution of 5,5,6,6,7,7,8,8,8-nonafluoro-3-iodo-2-methyloct-3-en-2-ol (2150 mg, 5 mmol, **1a**), benzamidine hydrochloride (1958 mg, 12.5 mmol, **2a**), and Cs<sub>2</sub>CO<sub>3</sub> (5702 mg, 17.5 mmol) in DMA (34 mL) was stirred at room temperature under air for 24 h. The reaction was then quenched by saturated NH<sub>4</sub>Cl solution (50 mL) and extracted with EtOAc (50 mL x 3). The organic layer was washed with saturated brine twice, dried over MgSO<sub>4</sub>, and concentrated under reduced pressure. The crude product was purified by flash silica gel column chromatography (300-400 mesh) using petroleum ether/ethyl acetate (10/1) as eluent to afford the pure product **3aa** (1888 mg, 71% yield).

## Further transformation of product **3aa**

### a) The reaction of product **3aa** with piperidine<sup>[2]</sup>

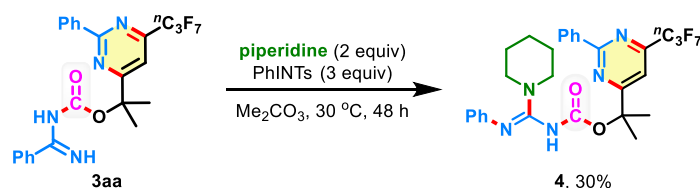

A solution of 2-(6-(perfluoropropyl)-2-phenylpyrimidin-4-yl)propan-2-yl imino(phenyl)methylcarbamate (158.5 mg, 0.3 mmol, **3aa**), piperidine (51.1 mg, 0.6 mmol), and PhINTs (337.7 mg, 0.9 mmol) in Me<sub>2</sub>CO<sub>3</sub> (2 mL) was stirred at 30 °C under air for 48 h. The reaction solvent was concentrated under reduced pressure. The crude product was purified by flash silica gel column chromatography (300-400 mesh) using petroleum ether/ethyl acetate (10/1) as eluent to afford the pure product **4** (55.2 mg, 30% yield).

### b) The reaction of product **3aa** with TfOH

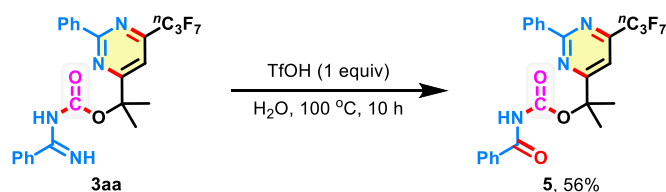

A solution of 2-(6-(perfluoropropyl)-2-phenylpyrimidin-4-yl)propan-2-yl imino(phenyl)methylcarbamate (158.5 mg, 0.3 mmol, **3aa**) and TfOH (45 mg, 0.3 mmol) in water (2 mL) was stirred at 100 °C under air for 10 h. The reaction solvent was concentrated under reduced pressure. The crude product was purified by flash silica gel column chromatography (300-400 mesh) using petroleum ether/ethyl acetate (10/1) as eluent to afford the pure product **5** (89.1 mg, 56% yield).

## Mechanistic studies

### a) The reaction of 5,5,6,6,7,7,8,8,8-nonafluoro-3-iodooct-3-en-1-ol (**1n**) with amidine **2a**

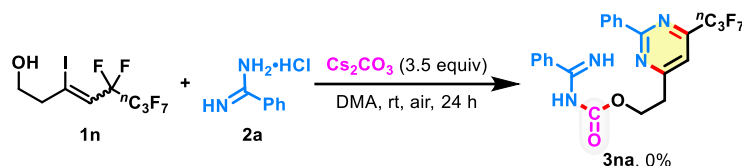

A solution of 5,5,6,6,7,7,8,8,8-nonafluoro-3-iodooct-3-en-1-ol (124.8 mg, 0.3 mmol, **1n**), benzamidine hydrochloride (117.5 mg, 0.75 mmol, **2a**), Cs<sub>2</sub>CO<sub>3</sub> (342.1 mg, 1.05 mmol) in DMA (2 mL) was stirred at room temperature under air for 24 h. No desired product **3na** was obtained.

*This result suggested that the length of the OH-containing chain in substrate has a dramatic effect on the transformation.*

### b) The reaction of 2-methylbut-3-yn-2-ol (**1o**) with amidine **2a**

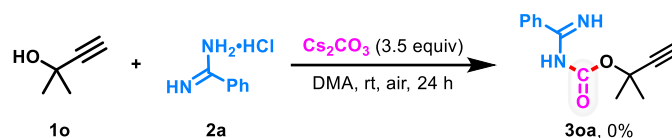

A solution of 2-methylbut-3-yn-2-ol (25.2 mg, 0.3 mmol, **1o**), benzamidine hydrochloride (117.5 mg, 0.75 mmol, **2a**), and Cs<sub>2</sub>CO<sub>3</sub> (324.1 mg, 1.05 mmol) in DMA (2 mL) was stirred at room temperature under air for 24 h. No desired product **3oa** was obtained.

*This result suggested the unique reactivity of the OH-containing polyfluoroalkylated alkenes for the success of the reaction.*

### c) The reaction of pre-formed pyrimidine **1p** with amidine **2a**

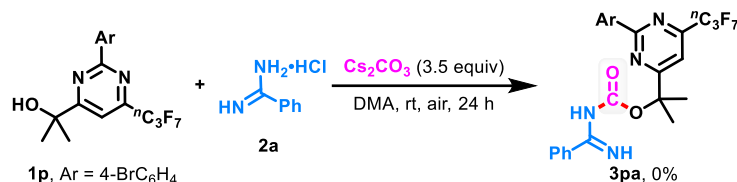

A solution of 2-(2-(4-bromophenyl)-6-(perfluoropropyl)pyrimidin-4-yl)propan-2-ol (46.1 mg, 0.1 mmol, **1p**), benzamidine hydrochloride (23.5 mg, 0.15 mmol, **2a**), and Cs<sub>2</sub>CO<sub>3</sub> (114.0 mg, 0.35 mmol) in DMA (2 mL) was stirred at room temperature under air for 24 h. No desired product **3pa** was obtained.

*This result suggested that the compound **1p** might not be a possible intermediate.*

### d) Radical trapping experiment

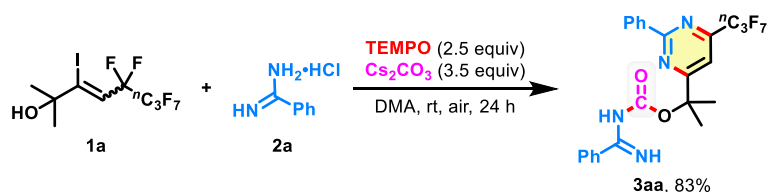

A solution of 5,5,6,6,7,7,8,8,8-nonafluoro-2-methyloct-3-en-2-ol (129 mg, 0.3 mmol, **1a**), benzamidine hydrochloride (117.5 mg, 0.75 mmol, **2a**), Cs<sub>2</sub>CO<sub>3</sub> (342.1 mg, 1.05 mmol), and

2,2,6,6-tetramethylpiperidinoxy (TEMPO, 117.2 mg, 0.75 mmol) in DMA (2 mL) was stirred at room temperature under air for 24 h. The reaction was then quenched by saturated  $\text{NH}_4\text{Cl}$  solution (20 mL) and extracted with EtOAc (20 mL x 3). The organic layer was washed with saturated brine twice, dried over  $\text{MgSO}_4$ , and concentrated under reduced pressure. The crude product was purified by flash silica gel column chromatography (300-400 mesh) using petroleum ether/ethyl acetate (10/1) as eluent to afford the pure product **3aa** (132 mg, 83% yield).

*This result suggested that four-component defluorinative cyclization might not proceed through a radical pathway.<sup>[3]</sup>*

### Characterization data for products

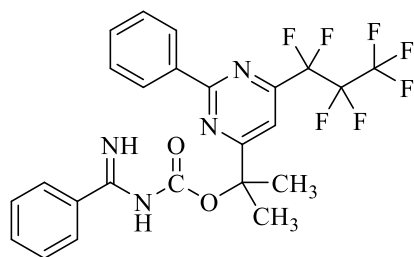

#### **2-(6-(Perfluoropropyl)-2-phenylpyrimidin-4-yl)propan-2-yl (imino(phenyl)methyl)carbamate (3aa):**

Yield = 89% (141.0 mg). White solid. M.p. 120.0–121.9 °C.

Purified by flash column chromatography through silica gel (petroleum ether/ethyl acetate, 10/1).

**IR (KBr):**  $\nu = 3374, 1720, 1616, 1276, 1229, 1212, 1139, 1120, 739, 698 \text{ cm}^{-1}$ .

**$^1\text{H}$  NMR (400 MHz,  $\text{CDCl}_3$ ):**  $\delta = 9.40$  (brs, 1H), 8.57–8.53 (m, 2H), 7.85–7.82 (m, 2H), 7.66 (s, 1H), 7.56–7.48 (m, 4H), 7.46–7.40 (m, 2H), 6.44 (brs, 1H), 1.92 (s, 6H) ppm.

**$^{19}\text{F}$  NMR (376 MHz,  $\text{CDCl}_3$ ):**  $\delta = -80.03$  (s, 3F),  $-116.57$  (s, 2F),  $-126.31$  (s, 2F) ppm.

**$^{13}\text{C}$  NMR (100 MHz,  $\text{CDCl}_3$ ):**  $\delta = 176.4, 168.7, 164.2, 163.3, 155.8$  (t,  $J_{\text{C-F}} = 26.3 \text{ Hz}$ ), 136.3, 134.1, 132.3, 131.4, 128.6, 128.6, 128.5, 127.1, 111.6 (t,  $J_{\text{C-F}} = 4.7 \text{ Hz}$ ), 81.3, 27.1 ppm, carbons corresponding to the  $\text{C}_3\text{F}_7$  group cannot be identified due to C-F coupling.

**HRMS (m/z):** calcd for  $\text{C}_{24}\text{H}_{20}\text{F}_7\text{N}_4\text{O}_2$   $[\text{M}+\text{H}]^+$  529.1469, found: 529.1470.

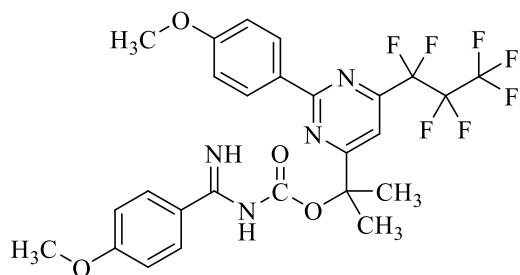

#### **2-(2-(4-Methoxyphenyl)-6-(perfluoropropyl)pyrimidin-4-yl)propan-2-yl (imino(4-methoxyphenyl)methyl)carbamate (3ab):**

Yield = 73% (129.4 mg). Yellow solid. M.p. 271–271.3 °C.

Purified by flash column chromatography through silica gel (petroleum ether/ethyl acetate, 4/1).

**IR (KBr):**  $\nu = 3389, 1662, 1608, 1554, 1499, 1390, 1216, 1139, 848, 745 \text{ cm}^{-1}$ .

**$^1\text{H}$  NMR (400 MHz,  $\text{CDCl}_3$ ):**  $\delta = 9.38$  (brs, 1H), 8.49 (d,  $J = 8.9 \text{ Hz}$ , 2H), 7.75 (d,  $J = 8.9 \text{ Hz}$ , 2H), 7.56 (s, 1H), 6.97 (d,  $J = 8.9 \text{ Hz}$ , 2H), 6.84–6.78 (m, 3H), 3.85 (s, 3H), 3.78 (s, 3H), 1.86 (s,

6H) ppm.

**<sup>19</sup>F NMR (376 MHz, CDCl<sub>3</sub>):**  $\delta$  = -80.06 (t,  $J$  = 8.9 Hz, 3F), -116.67 (q,  $J$  = 8.9 Hz, 2F), -126.39 (s, 2F) ppm.

**<sup>13</sup>C NMR (100 MHz, CDCl<sub>3</sub>):**  $\delta$  = 176.3, 167.9, 163.9, 163.3, 162.9, 162.3, 155.6 (t,  $J_{C-F}$  = 26.2 Hz), 130.4, 129.1, 129.1, 126.0, 113.8, 113.8, 110.7, 81.1, 55.3, 55.3, 27.1 ppm, carbons corresponding to the C<sub>3</sub>F<sub>7</sub> group cannot be identified due to C-F coupling.

**HRMS (m/z):** calcd for C<sub>26</sub>H<sub>24</sub>F<sub>7</sub>N<sub>4</sub>O<sub>4</sub> [M+H]<sup>+</sup> 589.1680, found: 589.1674.

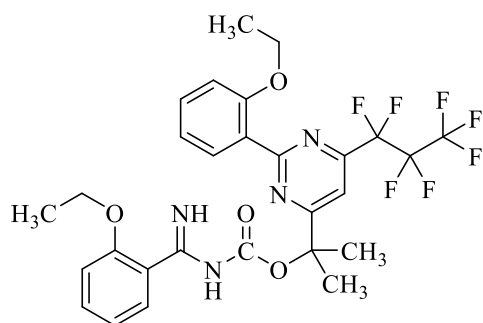

**2-(2-(2-Ethoxyphenyl)-6-(perfluoropropyl)pyrimidin-4-yl)propan-2-yl ((2-ethoxyphenyl)(imino)methyl)carbamate (3ac):**

Yield = 52% (95.5 mg). Yellow solid. M.p. 111.6–112.3 °C.

Purified by flash column chromatography through silica gel (petroleum ether/ethyl acetate, 10/1).

**IR (KBr):**  $\nu$  = 3499, 1654, 1618, 1512, 1283, 1233, 1210, 1151, 1139, 965, 752 cm<sup>-1</sup>.

**<sup>1</sup>H NMR (400 MHz, CDCl<sub>3</sub>):**  $\delta$  = 9.80 (brs, 1H), 8.54 (brs, 1H), 8.27 (d,  $J$  = 9.9 Hz, 1H), 7.91 (d,  $J$  = 9.6 Hz, 1H), 7.69 (s, 1H), 7.45-7.36 (m, 2H), 7.08-6.89 (m, 4H), 4.37-3.83 (m, 4H), 1.90 (s, 6H), 1.44 (t,  $J$  = 7.0 Hz, 3H), 1.36 (t,  $J$  = 6.9 Hz, 3H) ppm.

**<sup>19</sup>F NMR (376 MHz, CDCl<sub>3</sub>):**  $\delta$  = -80.12 (t,  $J$  = 8.9 Hz, 3F), -116.59 (q,  $J$  = 8.9 Hz, 2F), -126.21 (s, 2F) ppm.

**<sup>13</sup>C NMR (100 MHz, CDCl<sub>3</sub>):**  $\delta$  = 176.3, 167.2, 165.2, 163.3, 158.2, 157.8, 155.0 (t,  $J_{C-F}$  = 26.0 Hz), 133.7, 132.3, 131.9, 131.5, 127.2, 121.1, 120.4, 120.3, 113.4, 112.4, 111.3, 81.1, 64.8, 64.3, 27.3, 14.6, 14.5 ppm, carbons corresponding to the C<sub>3</sub>F<sub>7</sub> group cannot be identified due to C-F coupling.

**HRMS (m/z):** calcd for C<sub>28</sub>H<sub>28</sub>F<sub>7</sub>N<sub>4</sub>O<sub>4</sub> [M+H]<sup>+</sup> 617.1993, found: 617.1995.

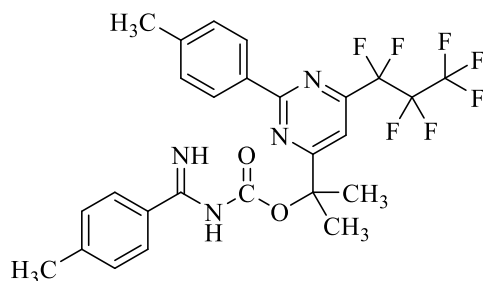

**2-(6-(Perfluoropropyl)-2-(p-tolyl)pyrimidin-4-yl)propan-2-yl ((p-tolyl)(imino)methyl)carbamate (3ad):**

Yield = 74% (122.8 mg). White solid. M.p. 147.0–147.9 °C.

Purified by flash column chromatography through silica gel (petroleum ether/ethyl acetate, 10/1).

**IR (KBr):**  $\nu$  = 3451, 3298, 1659, 1613, 1493, 1390, 1270, 1210, 1139, 1120, 742 cm<sup>-1</sup>.

**<sup>1</sup>H NMR (400 MHz, CDCl<sub>3</sub>):**  $\delta$  = 9.39 (brs, 1H), 8.45-8.41 (m, 2H), 7.76-7.72 (m, 2H), 7.62 (s, 1H), 7.29 (d,  $J$  = 7.7 Hz, 2H), 7.23 (d,  $J$  = 7.8 Hz, 2H), 6.40 (brs, 1H), 2.43 (s, 3H), 2.40 (s, 3H), 1.90 (s, 6H) ppm.

**<sup>19</sup>F NMR (376 MHz, CDCl<sub>3</sub>):**  $\delta$  = -80.04 (t,  $J$  = 8.9 Hz, 3F), -116.62 (q,  $J$  = 8.9 Hz, 2F), -126.36 (s, 2F) ppm.

**<sup>13</sup>C NMR (100 MHz, CDCl<sub>3</sub>):**  $\delta$  = 176.3, 168.6, 164.3, 163.4, 155.7 (t,  $J_{C-F}$  = 26.2 Hz), 142.9, 141.8, 133.7, 131.6, 129.3, 129.3, 128.6, 127.1, 111.2, 81.2, 27.1, 21.4, 21.3 ppm, carbons corresponding to the C<sub>3</sub>F<sub>7</sub> group cannot be identified due to C-F coupling.

**HRMS (m/z):** calcd for C<sub>26</sub>H<sub>24</sub>F<sub>7</sub>N<sub>4</sub>O<sub>2</sub> [M+H]<sup>+</sup> 557.1782, found: 557.1785.

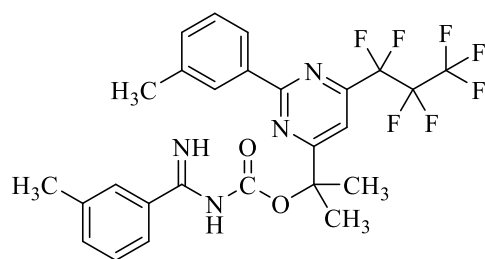

**2-(6-(Perfluoropropyl)-2-(*m*-tolyl)pyrimidin-4-yl)propan-2-yl ((imino(*m*-tolyl)methyl)carbamate (3ae):**

Yield = 81% (134.8 mg). Yellow solid. M.p. 80.2–81.9 °C.

Purified by flash column chromatography through silica gel (petroleum ether/ethyl acetate, 10/1).

**IR (KBr):**  $\nu$  = 3456, 3310, 1660, 1578, 1511, 1375, 1274, 1234, 1119, 789, 739 cm<sup>-1</sup>.

**<sup>1</sup>H NMR (400 MHz, CDCl<sub>3</sub>):**  $\delta$  = 9.40 (brs, 1H), 8.37-8.33 (m, 2H), 7.70 (s, 1H), 7.64 (s, 1H), 7.60-7.56 (m, 1H), 7.41-7.35 (m, 1H), 7.35-7.29 (m, 3H), 6.42 (brs, 1H), 2.45 (s, 3H), 2.39 (s, 3H), 1.92 (s, 6H) ppm.

**<sup>19</sup>F NMR (376 MHz, CDCl<sub>3</sub>):**  $\delta$  = -80.01 (s, 3F), -116.57 (s, 2F), -126.29 (s, 2F) ppm.

**<sup>13</sup>C NMR (100 MHz, CDCl<sub>3</sub>):**  $\delta$  = 176.3, 168.9, 164.4, 163.5, 155.8 (t,  $J_{C-F}$  = 26.0 Hz), 138.7, 138.2, 136.4, 134.2, 133.2, 132.2, 129.1, 128.6, 128.5, 128.0, 125.9, 124.0, 111.5, 81.3, 27.2, 21.5, 21.2 ppm, carbons corresponding to the C<sub>3</sub>F<sub>7</sub> group cannot be identified due to C-F coupling.

**HRMS (m/z):** calcd for C<sub>26</sub>H<sub>24</sub>F<sub>7</sub>N<sub>4</sub>O<sub>2</sub> [M+H]<sup>+</sup> 557.1782, found: 557.1782.

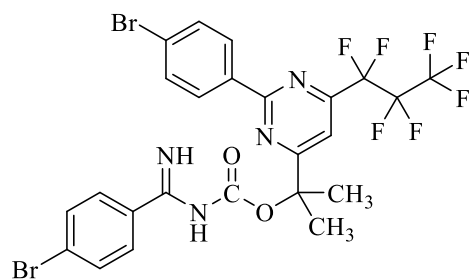

**2-(2-(4-Bromophenyl)-6-(perfluoropropyl)pyrimidin-4-yl)propan-2-yl ((4-bromophenyl)(imino)methyl)carbamate (3af):**

Yield = 57% (118.4 mg). Yellow solid. M.p. 155.3–155.5 °C.

Purified by flash column chromatography through silica gel (petroleum ether/ethyl acetate, 10/1).

**IR (KBr):**  $\nu$  = 3469, 1669, 1612, 1554, 1508, 1387, 1265, 1140, 1011, 840, 743 cm<sup>-1</sup>.

**<sup>1</sup>H NMR (400 MHz, CDCl<sub>3</sub>):**  $\delta$  = 9.38 (brs, 1H), 8.40 (d,  $J$  = 8.6 Hz, 2H), 7.68 (d,  $J$  = 8.6 Hz,

2H), 7.63 (d,  $J = 5.5$  Hz, 2H), 7.60 (s, 1H), 7.53 (d,  $J = 8.6$  Hz, 2H), 6.61 (brs, 1H), 1.88 (s, 6H) ppm.

$^{19}\text{F}$  NMR (376 MHz,  $\text{CDCl}_3$ ):  $\delta = -79.98$  (t,  $J = 8.9$  Hz, 3F),  $-116.63$  (q,  $J = 8.9$  Hz, 2F),  $-126.31$  (s, 2F) ppm.

$^{13}\text{C}$  NMR (100 MHz,  $\text{CDCl}_3$ ):  $\delta = 176.4, 167.7, 163.4, 163.3, 156.0$  (t,  $J_{\text{C-F}} = 26.1$  Hz),  $135.2, 133.0, 132.0, 131.8, 130.2, 128.7, 127.3, 126.4, 111.9, 81.3, 27.1$  ppm, carbons corresponding to the  $\text{C}_3\text{F}_7$  group cannot be identified due to C-F coupling.

HRMS (m/z): calcd for  $\text{C}_{24}\text{H}_{18}\text{Br}_2\text{F}_7\text{N}_4\text{O}_2$   $[\text{M}+\text{H}]^+$  684.9679, found: 684.9679.

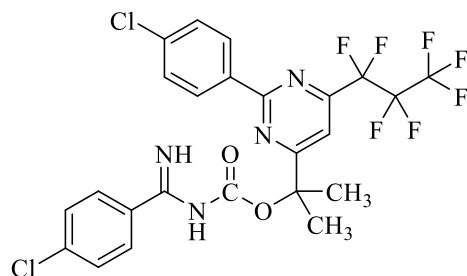

**2-(2-(4-Chlorophenyl)-6-(perfluoropropyl)pyrimidin-4-yl)propan-2-yl ((4-chlorophenyl)(imino)methyl)carbamate (3ag):**

Yield = 65% (116.1 mg). White solid. M.p.  $>300$  °C.

Purified by flash column chromatography through silica gel (petroleum ether/ethyl acetate, 10/1).

IR (KBr):  $\nu = 3368, 1671, 1614, 1386, 1266, 1248, 1218, 1141, 1116, 843, 745$   $\text{cm}^{-1}$ .

$^1\text{H}$  NMR (400 MHz,  $\text{CDCl}_3$ ):  $\delta = 9.39$  (brs, 1H),  $8.47$  (d,  $J = 8.6$  Hz, 2H),  $7.75$  (d,  $J = 8.6$  Hz, 2H),  $7.63$  (s, 1H),  $7.45$  (d,  $J = 8.6$  Hz, 2H),  $7.36$  (d,  $J = 8.6$  Hz, 2H),  $6.64$  (brs, 1H),  $1.88$  (s, 6H) ppm.

$^{19}\text{F}$  NMR (376 MHz,  $\text{CDCl}_3$ ):  $\delta = -80.03$  (t,  $J = 9.0$  Hz, 3F),  $-116.65$  (q,  $J = 9.2$  Hz, 2F),  $-126.33$  (s, 2F) ppm.

$^{13}\text{C}$  NMR (100 MHz,  $\text{CDCl}_3$ ):  $\delta = 176.4, 167.6, 163.3, 163.3, 156.0$  (t,  $J_{\text{C-F}} = 26.4$  Hz),  $138.8, 137.8, 134.8, 132.5, 130.0, 129.0, 128.8, 128.6, 111.8, 81.3, 27.1$  ppm, carbons corresponding to the  $\text{C}_3\text{F}_7$  group cannot be identified due to C-F coupling.

HRMS (m/z): calcd for  $\text{C}_{24}\text{H}_{18}\text{Cl}_2\text{F}_7\text{N}_4\text{O}_2$   $[\text{M}+\text{H}]^+$  597.0690, found: 597.0695.

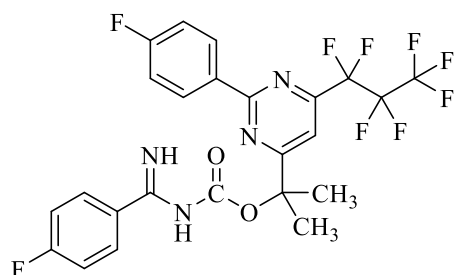

**2-(2-(4-Fluorophenyl)-6-(perfluoropropyl)pyrimidin-4-yl)propan-2-yl ((4-fluorophenyl)(imino)methyl)carbamate (3ah):**

Yield = 76% (127.9 mg). White solid. M.p.  $156.5$ – $157.9$  °C.

Purified by flash column chromatography through silica gel (petroleum ether/ethyl acetate, 4/1).

IR (KBr):  $\nu = 3318, 1907, 1489, 1273, 966, 850, 817, 744, 674, 649, 591, 525$   $\text{cm}^{-1}$ .

$^1\text{H}$  NMR (400 MHz,  $\text{CDCl}_3$ ):  $\delta = 9.39$  (brs, 1H),  $8.58$ – $8.50$  (m, 2H),  $7.86$ – $7.77$  (m, 2H),  $7.61$  (s,



1H), 7.19-7.10 (m, 2H), 7.08-7.00 (m, 2H), 6.75 (brs, 1H), 1.87 (s, 6H) ppm.

<sup>19</sup>F NMR (376 MHz, CDCl<sub>3</sub>): δ = -80.09 (t, *J* = 8.9 Hz, 3F), -106.36 ~ -106.43 (m, 1F), -108.61 ~ -108.68 (m, 1F), -116.67 (q, *J* = 9.3 Hz, 2F), -126.37 (s, 2F) ppm.

<sup>13</sup>C NMR (100 MHz, CDCl<sub>3</sub>): δ = 176.4, 167.6, 165.3 (d, *J*<sub>C-F</sub> = 252.1 Hz), 165.1 (d, *J*<sub>C-F</sub> = 252.1 Hz), 163.4, 156.0 (t, *J*<sub>C-F</sub> = 26.1 Hz), 132.6 (d, *J*<sub>C-F</sub> = 2.9 Hz), 130.9 (d, *J*<sub>C-F</sub> = 8.8 Hz), 130.3 (d, *J*<sub>C-F</sub> = 2.9 Hz), 129.6 (d, *J*<sub>C-F</sub> = 9.1 Hz), 116.0, 115.9 (d, *J*<sub>C-F</sub> = 21.7 Hz), 115.6 (d, *J*<sub>C-F</sub> = 21.6 Hz), 111.5 (t, *J*<sub>C-F</sub> = 4.0 Hz), 81.3, 27.1 ppm, carbons corresponding to the C<sub>3</sub>F<sub>7</sub> group cannot be identified due to C-F coupling.

HRMS (*m/z*): calcd for C<sub>24</sub>H<sub>18</sub>F<sub>9</sub>N<sub>4</sub>O<sub>2</sub> [M+H]<sup>+</sup> 565.1281, found: 565.1279.

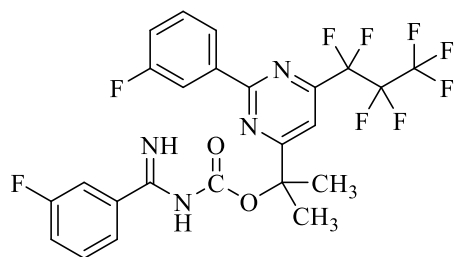

**2-(2-(3-Fluorophenyl)-6-(perfluoropropyl)pyrimidin-4-yl)propan-2-yl ((3-fluorophenyl)(imino)methyl)carbamate (3ai):**

Yield = 61% (103.3 mg). White solid. M.p. 119.7–120.0 °C.

Purified by flash column chromatography through silica gel (petroleum ether/ethyl acetate, 10/1).

IR (KBr): ν = 3387, 3222, 1664, 1617, 1588, 1513, 1377, 1287, 968, 742 cm<sup>-1</sup>.

<sup>1</sup>H NMR (400 MHz, CDCl<sub>3</sub>): δ = 9.38 (brs, 1H), 8.34 (d, *J* = 7.8 Hz, 1H), 8.25-8.20 (m, 1H), 7.66 (s, 1H), 7.60-7.54 (m, 2H), 7.50-7.42 (m, 1H), 7.41-7.35 (m, 1H), 7.25-7.17 (m, 2H), 6.59 (brs, 1H), 1.90 (s, 6H) ppm.

<sup>19</sup>F NMR (376 MHz, CDCl<sub>3</sub>): δ = -80.06 (s, 3F), -111.27 (s, 1F), -112.77 (s, 1F), -116.60 (s, 2F), -126.32 (s, 2F) ppm.

<sup>13</sup>C NMR (100 MHz, CDCl<sub>3</sub>): δ = 176.5, 167.5, 163.3, 163.1 (d, *J*<sub>C-F</sub> = 243.9 Hz), 163.1 (d, *J*<sub>C-F</sub> = 2.6 Hz), 162.6 (d, *J*<sub>C-F</sub> = 246.7 Hz), 156.0 (t, *J*<sub>C-F</sub> = 26.2 Hz), 138.6 (d, *J*<sub>C-F</sub> = 8.1 Hz), 136.4 (d, *J*<sub>C-F</sub> = 7.5 Hz), 130.4 (d, *J*<sub>C-F</sub> = 7.8 Hz), 130.1 (d, *J*<sub>C-F</sub> = 8.0 Hz), 124.3 (d, *J*<sub>C-F</sub> = 2.7 Hz), 122.6 (d, *J*<sub>C-F</sub> = 3.2 Hz), 119.4 (d, *J*<sub>C-F</sub> = 21.1 Hz), 118.4 (d, *J*<sub>C-F</sub> = 21.4 Hz), 115.4 (d, *J*<sub>C-F</sub> = 23.4 Hz), 114.7 (d, *J*<sub>C-F</sub> = 23.6 Hz), 112.1, 81.4, 27.1 ppm, carbons corresponding to the C<sub>3</sub>F<sub>7</sub> group cannot be identified due to C-F coupling.

HRMS (*m/z*): calcd for C<sub>24</sub>H<sub>18</sub>F<sub>9</sub>N<sub>4</sub>O<sub>2</sub> [M+H]<sup>+</sup> 565.1281, found: 565.1281.

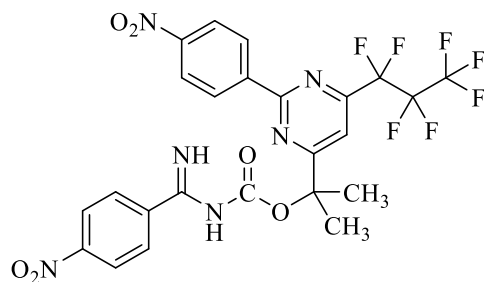

**2-(2-(4-Nitrophenyl)-6-(perfluoropropyl)pyrimidin-4-yl)propan-2-yl ((4-nitrophenyl)(imino)methyl)carbamate (3aj):**

Yield = 59% (108.8 mg). Yellow solid. M.p. 147.3–148.4 °C.

Purified by flash column chromatography through silica gel (petroleum ether/ethyl acetate, 4/1).

**IR (KBr):**  $\nu = 3409, 1711, 1667, 1634, 1530, 1350, 1271, 1188, 872, 740 \text{ cm}^{-1}$ .

**<sup>1</sup>H NMR (400 MHz, DMSO-*d*<sub>6</sub>):**  $\delta = 9.36$  (brs, 1H), 9.20 (brs, 1H), 8.64 (d,  $J = 8.9 \text{ Hz}$ , 2H), 8.43 (d,  $J = 8.9 \text{ Hz}$ , 2H), 8.27 (d,  $J = 8.9 \text{ Hz}$ , 2H), 8.17 (d,  $J = 8.9 \text{ Hz}$ , 2H), 8.01 (s, 1H), 1.90 (s, 6H) ppm.

**<sup>19</sup>F NMR (376 MHz, DMSO-*d*<sub>6</sub>):**  $\delta = -79.71$  (t,  $J = 8.9 \text{ Hz}$ , 3F),  $-115.88$  (q,  $J = 8.8 \text{ Hz}$ , 2F),  $-126.08$  (s, 2F) ppm.

**<sup>13</sup>C NMR (100 MHz, DMSO-*d*<sub>6</sub>):**  $\delta = 177.8, 165.2, 162.3, 161.6, 154.9$  (t,  $J_{\text{C-F}} = 26.1 \text{ Hz}$ ), 149.5, 149.4, 141.3, 140.0, 129.4, 129.3, 124.3, 123.4, 113.6, 80.1, 26.7 ppm, carbons corresponding to the C<sub>3</sub>F<sub>7</sub> group cannot be identified due to C-F coupling.

**HRMS (m/z):** calcd for C<sub>24</sub>H<sub>18</sub>F<sub>7</sub>N<sub>6</sub>O<sub>6</sub> [M+H]<sup>+</sup> 619.1171, found: 619.1170.

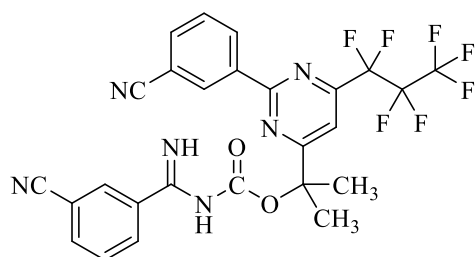

### 2-(2-(3-Cyanophenyl)-6-(perfluoropropyl)pyrimidin-4-yl)propan-2-yl

#### ((3-cyanophenyl)imino)methyl carbamate (3ak):

Yield = 30% (52.8 mg). White solid. M.p. 89.9–91.0 °C.

Purified by flash column chromatography through silica gel (petroleum ether/ethyl acetate, 4/1).

**IR (KBr):**  $\nu = 3414, 2929, 2234, 1625, 1555, 1522, 1380, 1273, 1122, 741 \text{ cm}^{-1}$ .

**<sup>1</sup>H NMR (400 MHz, CDCl<sub>3</sub>):**  $\delta = 9.38$  (brs, 1H), 8.81–8.75 (m, 2H), 8.24–8.21 (m, 1H), 8.12–8.08 (m, 1H), 7.83–7.76 (m, 2H), 7.70 (s, 1H), 7.65–7.54 (m, 2H), 6.95 (brs, 1H), 1.91 (s, 6H) ppm.

**<sup>19</sup>F NMR (376 MHz, CDCl<sub>3</sub>):**  $\delta = -80.00$  (t,  $J = 9.1 \text{ Hz}$ , 3F),  $-116.55$  (t,  $J = 9.4 \text{ Hz}$ , 2F),  $-126.22$  (s, 2F) ppm.

**<sup>13</sup>C NMR (100 MHz, CDCl<sub>3</sub>):**  $\delta = 176.7, 166.6, 163.1, 162.2, 156.2$  (t,  $J_{\text{C-F}} = 26.2 \text{ Hz}$ ), 137.4, 135.6, 135.4, 134.5, 132.8, 132.3, 131.5, 131.3, 129.7, 129.6, 118.6, 117.7, 113.0, 112.8, 112.7, 81.4, 27.1 ppm, carbons corresponding to the C<sub>3</sub>F<sub>7</sub> group cannot be identified due to C-F coupling.

**HRMS (m/z):** calcd for C<sub>26</sub>H<sub>18</sub>F<sub>7</sub>N<sub>6</sub>O<sub>2</sub> [M+H]<sup>+</sup> 579.1374, found: 579.1371.

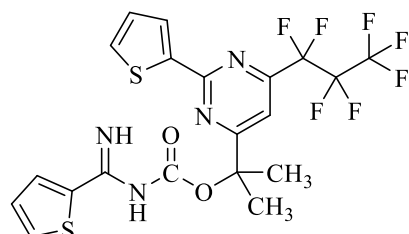

### 2-(6-(Perfluoropropyl)-2-(thiophen-2-yl)pyrimidin-4-yl)propan-2-yl

#### (imino(thiophen-2-yl)methyl) carbamate (3al):

Yield = 43% (70.0 mg). White solid. M.p. 145.9–146.8 °C.

Purified by flash column chromatography through silica gel (petroleum ether/ethyl acetate, 10/1).

**IR (KBr):**  $\nu = 3374, 1665, 1607, 1547, 1491, 1438, 1277, 1239, 1146, 1121, 741, 716 \text{ cm}^{-1}$ .

**$^1\text{H}$  NMR (400 MHz,  $\text{CDCl}_3$ ):**  $\delta = 9.34$  (brs, 1H), 8.09 (d,  $J = 3.8$  Hz, 1H), 7.62 (d,  $J = 3.8$  Hz, 1H), 7.54-7.48 (m, 3H), 7.13 (dd,  $J = 5.0, 3.7$  Hz, 1H), 7.08 (dd,  $J = 5.0, 3.8$  Hz, 1H), 6.71 (brs, 1H), 1.83 (s, 6H) ppm.

**$^{19}\text{F}$  NMR (376 MHz,  $\text{CDCl}_3$ ):**  $\delta = -80.00$  (t,  $J = 9.0$  Hz, 3F),  $-116.70$  (q,  $J = 9.0$  Hz, 2F),  $-126.32$  (s, 2F) ppm.

**$^{13}\text{C}$  NMR (100 MHz,  $\text{CDCl}_3$ ):**  $\delta = 176.5, 163.1, 162.7, 161.0, 155.7$  (t,  $J_{\text{C-F}} = 26.2$  Hz), 142.2, 138.3, 132.0, 131.0, 130.4, 128.8, 128.3, 128.0, 111.0, 81.3, 27.0 ppm, carbons corresponding to the  $\text{C}_3\text{F}_7$  group cannot be identified due to C-F coupling.

**HRMS (m/z):** calcd for  $\text{C}_{20}\text{H}_{16}\text{F}_7\text{N}_4\text{O}_2\text{S}_2$   $[\text{M}+\text{H}]^+$  541.0597, found: 541.0599.

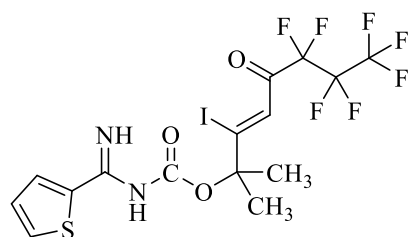

**(Z)-6,6,7,7,8,8,8-Heptafluoro-3-iodo-2-methyl-5-oxooct-3-en-2-yl  
(imino(thiophen-2-yl)methyl)carbamate (3al')**

Yield = 13% (22.4 mg). Yellow solid. M.p. 140.6–141.2 °C.

Purified by flash column chromatography through silica gel (petroleum ether/ethyl acetate, 10/1).

**IR (KBr):**  $\nu = 3419, 3292, 2994, 1654, 1539, 1485, 1354, 1278, 1117, 962, 797 \text{ cm}^{-1}$ .

**$^1\text{H}$  NMR (400 MHz,  $\text{CDCl}_3$ ):**  $\delta = 9.47$  (brs, 1H), 7.64 (dd,  $J = 3.8, 1.1$  Hz, 1H), 7.55 (d,  $J = 5.1$  Hz, 1H), 7.11-7.09 (m, 1H), 6.56 (brs, 1H), 5.78 (s, 1H), 1.57 (s, 6H) ppm.

**$^{19}\text{F}$  NMR (376 MHz,  $\text{CDCl}_3$ ):**  $\delta = -80.21$  (t,  $J = 8.9$  Hz, 3F),  $-120.12$  (q,  $J = 9.5$  Hz, 2F),  $-127.10$  (s, 2F) ppm.

**$^{13}\text{C}$  NMR (100 MHz,  $\text{CDCl}_3$ ):**  $\delta = 201.3, 163.4, 162.6, 147.1, 138.5, 131.9, 128.7, 128.0, 91.2, 82.9, 24.0$  ppm, carbons corresponding to the  $\text{C}_3\text{F}_7$  group cannot be identified due to C-F coupling.

**HRMS (m/z):** calcd for  $\text{C}_{15}\text{H}_{13}\text{F}_7\text{IN}_2\text{O}_3\text{S}$   $[\text{M}+\text{H}]^+$  560.9574, found: 560.9575.

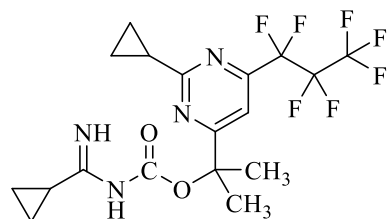

**2-(2-Cyclopropyl-6-(perfluoropropyl)pyrimidin-4-yl)propan-2-yl  
(cyclopropyl(imino)methyl)carbamate (3am)**

Yield = 47% (64.7 mg). Yellow solid. M.p. 70.2–70.3 °C.

Purified by flash column chromatography through silica gel (petroleum ether/ethyl acetate, 4/1).

**IR (KBr):**  $\nu = 3350, 3220, 1764, 1674, 1614, 1518, 1434, 1294, 1116, 942, 741 \text{ cm}^{-1}$ .

**$^1\text{H}$  NMR (400 MHz,  $\text{CDCl}_3$ ):**  $\delta = 9.12$  (brs, 1H), 7.37 (s, 1H), 6.37 (brs, 1H), 2.35-2.26 (m, 1H), 1.69 (s, 6H), 1.42-1.34 (m, 1H), 1.19-1.15 (m, 2H), 1.08 (dt,  $J = 8.2, 3.1$  Hz, 2H), 1.01-0.95 (m, 2H), 0.90-0.84 (m, 2H) ppm.

**<sup>19</sup>F NMR (376 MHz, CDCl<sub>3</sub>):**  $\delta$  = -80.12 (t,  $J$  = 9.1 Hz, 3F), -116.94 (q,  $J$  = 9.3 Hz, 2F), -126.46 (s, 2F) ppm.

**<sup>13</sup>C NMR (100 MHz, CDCl<sub>3</sub>):**  $\delta$  = 176.1, 176.1, 172.4, 163.2, 154.9 (t,  $J_{C-F}$  = 25.8 Hz), 110.5, 80.7, 27.2, 18.2, 16.6, 11.7, 9.1 ppm, carbons corresponding to the C<sub>3</sub>F<sub>7</sub> group cannot be identified due to C-F coupling.

**HRMS (m/z):** calcd for C<sub>18</sub>H<sub>20</sub>F<sub>7</sub>N<sub>4</sub>O<sub>2</sub> [M+H]<sup>+</sup> 457.1469, found: 457.1466.

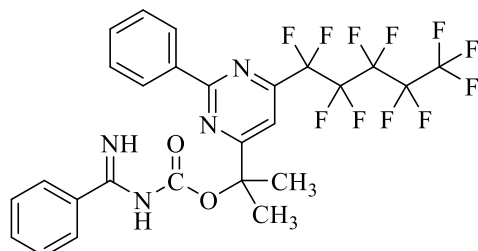

**2-(6-(Perfluoropentyl)-2-phenylpyrimidin-4-yl)propan-2-yl (imino(phenyl)methyl)carbamate (3ba):**

Yield = 64% (120.5 mg). Yellow solid. M.p. 100.2–100.6 °C.

Purified by flash column chromatography through silica gel (petroleum ether/ethyl acetate, 10/1).

**IR (KBr):**  $\nu$  = 3451, 3309, 1659, 1575, 1381, 1276, 1237, 1139, 865, 696 cm<sup>-1</sup>.

**<sup>1</sup>H NMR (400 MHz, CDCl<sub>3</sub>):**  $\delta$  = 9.41 (brs, 1H), 8.59–8.53 (m, 2H), 7.78 (d,  $J$  = 7.1 Hz, 2H), 7.66 (s, 1H), 7.54–7.45 (m, 4H), 7.35 (t,  $J$  = 7.8 Hz, 2H), 6.83 (brs, 1H), 1.89 (s, 6H) ppm.

**<sup>19</sup>F NMR (376 MHz, CDCl<sub>3</sub>):**  $\delta$  = -80.74 (t,  $J$  = 10.0 Hz, 3F), -115.58 (t,  $J$  = 13.3 Hz, 2F), -122.06 (dt,  $J$  = 60.3, 13.4 Hz, 4F), -126.12 (t,  $J$  = 14.4 Hz, 2F) ppm.

**<sup>13</sup>C NMR (100 MHz, CDCl<sub>3</sub>):**  $\delta$  = 176.4, 168.7, 164.2, 163.4, 156.0 (t,  $J_{C-F}$  = 26.2 Hz), 136.4, 134.2, 132.3, 131.4, 128.6, 128.6, 128.5, 127.1, 111.7, 81.3, 27.1 ppm, carbons corresponding to the C<sub>5</sub>F<sub>11</sub> group cannot be identified due to C-F coupling.

**HRMS (m/z):** calcd for C<sub>26</sub>H<sub>20</sub>F<sub>11</sub>N<sub>4</sub>O<sub>2</sub> [M+H]<sup>+</sup> 629.1405, found: 629.1408.

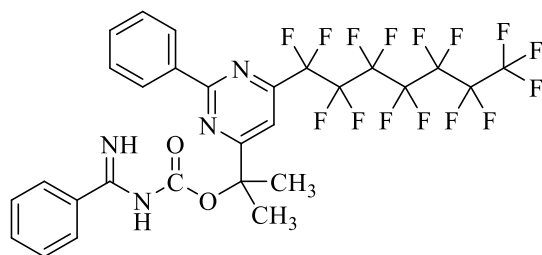

**2-(6-(Perfluoroheptyl)-2-phenylpyrimidin-4-yl)propan-2-yl (imino(phenyl)methyl)carbamate (3ca):**

Yield = 79% (172.8 mg). Yellow oil.

Purified by flash column chromatography through silica gel (petroleum ether/ethyl acetate, 10/1).

**IR (KBr):**  $\nu$  = 3352, 1776, 1617, 1578, 1519, 1387, 1278, 1143, 1011, 696 cm<sup>-1</sup>.

**<sup>1</sup>H NMR (400 MHz, CDCl<sub>3</sub>):**  $\delta$  = 9.41 (brs, 1H), 8.59–8.53 (m, 2H), 7.77 (d,  $J$  = 7.1 Hz, 2H), 7.66 (s, 1H), 7.52–7.43 (m, 5H), 7.33 (t,  $J$  = 7.8 Hz, 2H), 1.89 (s, 6H) ppm.

**<sup>19</sup>F NMR (376 MHz, CDCl<sub>3</sub>):**  $\delta$  = -80.83 (t,  $J$  = 9.6 Hz, 3F), -115.51 (t,  $J$  = 13.5 Hz, 2F), -121.18 (s, 2F), -121.69 (s, 2F), -121.97 (s, 2F), -122.74 (s, 2F), -126.17 (dq,  $J$  = 14.7, 7.3 Hz, 2F) ppm.

$^{13}\text{C}$  NMR (100 MHz,  $\text{CDCl}_3$ ):  $\delta = 176.2, 168.7, 164.3, 162.9, 156.1$  (t,  $J_{\text{C-F}} = 26.1$  Hz), 136.3, 133.8, 132.4, 131.4, 128.6, 128.6, 128.5, 127.2, 111.6, 81.4, 27.0 ppm, carbons corresponding to the  $\text{C}_7\text{F}_{15}$  group cannot be identified due to C-F coupling.

HRMS (m/z): calcd for  $\text{C}_{28}\text{H}_{20}\text{F}_{15}\text{N}_4\text{O}_2$   $[\text{M}+\text{H}]^+$  729.1341, found: 729.1342.

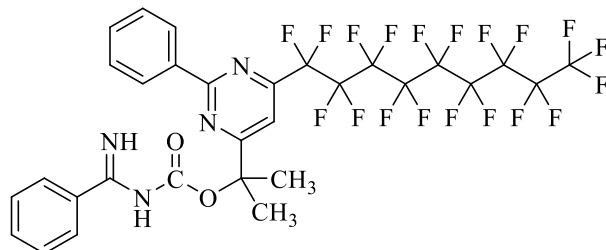

**2-(6-(Perfluorononyl)-2-phenylpyrimidin-4-yl)propan-2-yl (imino(phenyl)methyl)carbamate (3da):**

Yield = 69% (170.8 mg). White solid. M.p. 138.3–139.6 °C.

Purified by flash column chromatography through silica gel (petroleum ether/ethyl acetate, 10/1).

IR (KBr):  $\nu = 3349, 3181, 1676, 1614, 1552, 1519, 1385, 1216, 1151, 701$   $\text{cm}^{-1}$ .

$^1\text{H}$  NMR (400 MHz,  $\text{CDCl}_3$ ):  $\delta = 9.42$  (brs, 1H), 8.56 (dd,  $J = 7.5, 2.3$  Hz, 2H), 7.78 (d,  $J = 7.1$  Hz, 2H), 7.66 (s, 1H), 7.48 (dd,  $J = 6.6, 4.9$  Hz, 4H), 7.35 (t,  $J = 7.8$  Hz, 2H), 6.80 (brs, 1H), 1.89 (s, 6H) ppm.

$^{19}\text{F}$  NMR (376 MHz,  $\text{CDCl}_3$ ):  $\delta = -80.87$  (t,  $J = 9.9$  Hz, 3F), -115.55 (t,  $J = 13.5$  Hz, 2F), -121.14 (s, 2F), -121.84 (d,  $J = 83.4$  Hz, 8F), -122.77 (s, 2F), -126.20 (s, 2F) ppm.

$^{13}\text{C}$  NMR (100 MHz,  $\text{CDCl}_3$ ):  $\delta = 176.4, 168.7, 164.3, 163.4, 156.1$  (t,  $J_{\text{C-F}} = 26.5$  Hz), 136.4, 134.2, 132.3, 131.4, 128.6, 128.6, 128.5, 127.2, 111.7, 81.3, 27.1 ppm, carbons corresponding to the  $\text{C}_9\text{F}_{19}$  group cannot be identified due to C-F coupling.

HRMS (m/z): calcd for  $\text{C}_{30}\text{H}_{20}\text{F}_{19}\text{N}_4\text{O}_2$   $[\text{M}+\text{H}]^+$  829.1277, found: 829.1274.

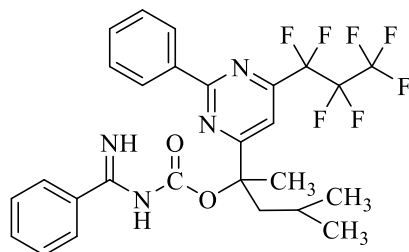

**4-Methyl-2-(6-(perfluoropropyl)-2-phenylpyrimidin-4-yl)pentan-2-yl (imino(phenyl)methyl)carbamate (3fa):**

Yield = 56% (95.7 mg). Yellow oil.

Purified by flash column chromatography through silica gel (petroleum ether/ethyl acetate, 10/1).

IR (KBr):  $\nu = 3351, 2961, 1735, 1616, 1577, 1518, 1260, 1231, 962, 739, 696$   $\text{cm}^{-1}$ .

$^1\text{H}$  NMR (400 MHz,  $\text{CDCl}_3$ ):  $\delta = 9.42$  (brs, 1H), 8.57 (dd,  $J = 7.4, 2.4$  Hz, 2H), 7.79 (d,  $J = 8.5$  Hz, 2H), 7.71 (s, 1H), 7.55-7.46 (m, 4H), 7.37 (t,  $J = 7.7$  Hz, 2H), 6.83 (brs, 1H), 2.15 (d,  $J = 6.0$  Hz, 2H), 2.01 (s, 3H), 1.85-1.75 (m, 1H), 0.90-0.84 (m, 6H) ppm.

$^{19}\text{F}$  NMR (376 MHz,  $\text{CDCl}_3$ ):  $\delta = -80.01$  (t,  $J = 9.0$  Hz, 3F), -116.55 ~ -116.64 (m, 2F), -126.33 (s, 2F) ppm.

**<sup>13</sup>C NMR (100 MHz, CDCl<sub>3</sub>):**  $\delta$  = 176.3, 168.6, 164.1, 163.4, 155.7 (t,  $J_{C-F}$  = 26.2 Hz), 136.4, 134.3, 132.3, 131.4, 128.6, 128.6, 128.6, 127.2, 112.3, 84.0, 48.9, 24.3, 24.0, 24.0, 23.9 ppm, carbons corresponding to the C<sub>3</sub>F<sub>7</sub> group cannot be identified due to C-F coupling.

**HRMS (m/z):** calcd for C<sub>27</sub>H<sub>26</sub>F<sub>7</sub>N<sub>4</sub>O<sub>2</sub> [M+H]<sup>+</sup> 571.1938, found: 571.1935.

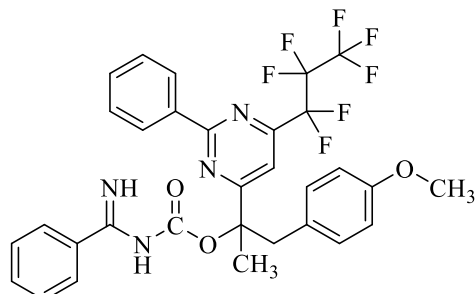

**1-(4-Methoxyphenyl)-2-(6-(perfluoropropyl)-2-phenylpyrimidin-4-yl)propan-2-yl (imino(phenyl)methyl)carbamate (3ga):**

Yield = 57% (72.9 mg; using 0.2 mmol **1g**). Yellow solid. M.p. 137.4–138.1 °C.

Purified by flash column chromatography through silica gel (petroleum ether/ethyl acetate, 10/1).

**IR (KBr):**  $\nu$  = 3329, 1659, 1617, 1514, 1384, 1279, 1232, 1121, 913, 791, 697 cm<sup>-1</sup>.

**<sup>1</sup>H NMR (400 MHz, CDCl<sub>3</sub>):**  $\delta$  = 9.41 (brs, 1H), 8.56-8.51 (m, 2H), 7.85-7.81 (m, 2H), 7.57-7.48 (m, 4H), 7.46-7.20 (m, 2H), 7.32 (s, 1H), 6.92-6.88 (m, 2H), 6.74-6.69 (m, 2H), 6.50 (brs, 1H), 3.72 (s, 3H), 3.50 (d,  $J$  = 13.9 Hz, 1H), 3.38 (d,  $J$  = 13.9 Hz, 1H), 2.00 (s, 3H) ppm.

**<sup>19</sup>F NMR (376 MHz, CDCl<sub>3</sub>):**  $\delta$  = -80.00 (t,  $J$  = 8.9 Hz, 3F), -116.55 (dt,  $J$  = 12.9, 6.3 Hz, 2F), -126.30 (s, 2F) ppm.

**<sup>13</sup>C NMR (100 MHz, CDCl<sub>3</sub>):**  $\delta$  = 175.1, 168.5, 164.0, 163.5, 158.5, 155.2 (t,  $J_{C-F}$  = 26.5 Hz), 136.4, 134.2, 132.4, 131.5, 131.5, 128.7, 128.6, 128.6, 127.3, 127.2, 113.5, 112.9, 83.8, 55.1, 45.9, 23.4 ppm, carbons corresponding to the C<sub>3</sub>F<sub>7</sub> group cannot be identified due to C-F coupling.

**HRMS (m/z):** calcd for C<sub>31</sub>H<sub>26</sub>F<sub>7</sub>N<sub>4</sub>O<sub>3</sub> [M+H]<sup>+</sup> 635.1888, found: 635.1888.

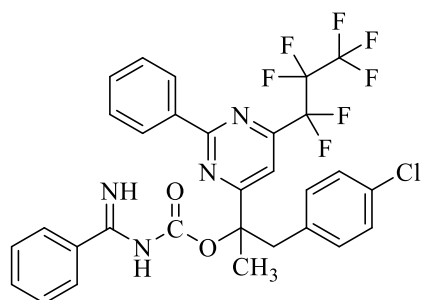

**1-(4-Chlorophenyl)-2-(6-(perfluoropropyl)-2-phenylpyrimidin-4-yl)propan-2-yl (imino(phenyl)methyl)carbamate (3ha):**

Yield = 66% (127.1 mg). Yellow solid. M.p. 80.3–81.2 °C.

Purified by flash column chromatography through silica gel (petroleum ether/ethyl acetate, 10/1).

**IR (KBr):**  $\nu$  = 3629, 3310, 1735, 1654, 1492, 1382, 1273, 1231, 965, 697 cm<sup>-1</sup>.

**<sup>1</sup>H NMR (400 MHz, CDCl<sub>3</sub>):**  $\delta$  = 9.43 (brs, 1H), 8.54 (dd,  $J$  = 7.8, 2.1 Hz, 2H), 7.80 (d,  $J$  = 7.8 Hz, 2H), 7.58-7.50 (m, 4H), 7.44-7.34 (m, 3H), 7.16 (d,  $J$  = 8.5 Hz, 2H), 6.96 (d,  $J$  = 8.3 Hz, 2H), 6.74 (brs, 1H), 3.49 (q,  $J$  = 13.9 Hz, 2H), 1.97 (s, 3H) ppm.

**<sup>19</sup>F NMR (376 MHz, CDCl<sub>3</sub>):**  $\delta$  = -80.00 (t, *J* = 8.9 Hz, 3F), -116.58 (dd, *J* = 16.8, 8.9 Hz, 2F), -126.34 (s, 2F) ppm.

**<sup>13</sup>C NMR (100 MHz, CDCl<sub>3</sub>):**  $\delta$  = 174.9, 168.7, 164.2, 163.3, 155.5 (t, *J*<sub>C-F</sub> = 26.2 Hz), 136.2, 134.1, 133.9, 132.8, 132.5, 131.8, 131.6, 128.8, 128.6, 128.6, 128.2, 127.2, 112.7, 83.4, 45.6, 23.8 ppm, carbons corresponding to the C<sub>3</sub>F<sub>7</sub> group cannot be identified due to C-F coupling.

**HRMS (m/z):** calcd for C<sub>30</sub>H<sub>23</sub>ClF<sub>7</sub>N<sub>4</sub>O<sub>2</sub> [M+H]<sup>+</sup> 639.1392, found: 639.1389.

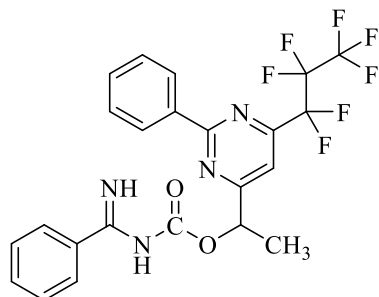

**1-(6-(Perfluoropropyl)-2-phenylpyrimidin-4-yl)ethyl (imino(phenyl)methyl)carbamate (3ia):**

Yield = 31% (48.5 mg). Yellow solid. M.p. 94.1–95.8 °C.

Purified by flash column chromatography through silica gel (petroleum ether/ethyl acetate, 10/1).

**IR (KBr):**  $\nu$  = 3432, 3299, 1665, 1600, 1575, 1390, 1262, 1111, 739, 694 cm<sup>-1</sup>.

**<sup>1</sup>H NMR (400 MHz, CDCl<sub>3</sub>):**  $\delta$  = 9.60 (brs, 1H), 8.55–8.51 (m, 2H), 7.92–7.88 (m, 2H), 7.73 (s, 1H), 7.60–7.55 (m, 1H), 7.52–7.45 (m, 5H), 6.56 (brs, 1H), 5.97 (dd, *J* = 6.9, 0.5 Hz, 1H), 1.76 (d, *J* = 6.9 Hz, 3H) ppm.

**<sup>19</sup>F NMR (376 MHz, CDCl<sub>3</sub>):**  $\delta$  = -79.98 (t, *J* = 9.0 Hz, 3F), -116.25 ~ -116.34 (m, 2F), -126.03 (s, 2F) ppm.

**<sup>13</sup>C NMR (100 MHz, CDCl<sub>3</sub>):**  $\delta$  = 173.3, 168.9, 164.5, 163.8, 156.7 (t, *J*<sub>C-F</sub> = 26.2 Hz), 136.1, 134.2, 132.6, 131.6, 128.9, 128.7, 128.6, 127.2, 111.8, 73.5, 20.7 ppm, carbons corresponding to the C<sub>3</sub>F<sub>7</sub> group cannot be identified due to C-F coupling.

**HRMS (m/z):** calcd for C<sub>23</sub>H<sub>18</sub>F<sub>7</sub>N<sub>4</sub>O<sub>2</sub> [M+H]<sup>+</sup> 515.1312, found: 515.1317.

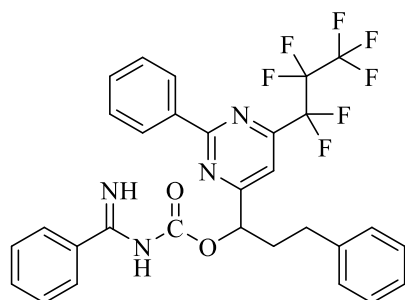

**1-(6-(Perfluoropropyl)-2-phenylpyrimidin-4-yl)-3-phenylpropyl (imino(phenyl)methyl)carbamate (3ja):**

Yield = 20% (36.2 mg). Yellow solid. M.p. 106.9–107.1 °C.

Purified by flash column chromatography through silica gel (petroleum ether/ethyl acetate, 10/1).

**IR (KBr):**  $\nu$  = 3309, 1675, 1625, 1574, 1557, 1389, 1256, 1144, 963, 698 cm<sup>-1</sup>.

**<sup>1</sup>H NMR (400 MHz, CDCl<sub>3</sub>):**  $\delta$  = 9.59 (brs, 1H), 8.56–8.51 (m, 2H), 7.92–7.86 (m, 2H), 7.70 (s, 1H), 7.60–7.43 (m, 7H), 7.30–7.22 (m, 4H), 7.20 (d, *J* = 7.0 Hz, 1H), 5.91 (t, *J* = 6.6 Hz, 1H),

2.94-2.86 (m, 2H), 2.41 (q,  $J = 7.2$  Hz, 2H) ppm.

$^{19}\text{F}$  NMR (376 MHz,  $\text{CDCl}_3$ ):  $\delta = -79.97$  (t,  $J = 9.0$  Hz, 3F),  $-116.30 \sim -116.40$  (m, 2F),  $-126.08$  (s, 2F) ppm.

$^{13}\text{C}$  NMR (100 MHz,  $\text{CDCl}_3$ ):  $\delta = 172.6, 169.1, 164.6, 164.0, 156.7$  (t,  $J_{\text{C-F}} = 26.2$  Hz),  $140.9, 136.1, 134.3, 132.5, 131.6, 128.9, 128.7, 128.6, 128.5, 128.5, 127.3, 126.1, 112.3, 76.5, 36.5, 31.6$  ppm, carbons corresponding to the  $\text{C}_3\text{F}_7$  group cannot be identified due to C-F coupling.

HRMS (m/z): calcd for  $\text{C}_{30}\text{H}_{24}\text{F}_7\text{N}_4\text{O}_2$   $[\text{M}+\text{H}]^+$  605.1782, found: 605.1780.

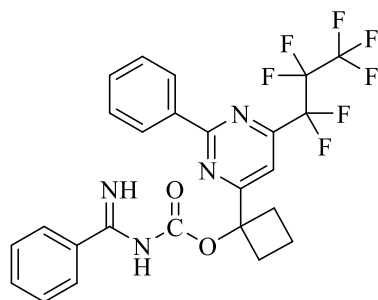

**1-(6-(Perfluoropropyl)-2-phenylpyrimidin-4-yl)cyclobutyl (imino(phenyl)methyl)carbamate (3ka):**

Yield = 32% (52.5 mg). Yellow solid. M.p. 108.1–109.9 °C.

Purified by flash column chromatography through silica gel (petroleum ether/ethyl acetate, 10/1).

IR (KBr):  $\nu = 3352, 1665, 1617, 1554, 1385, 1282, 1243, 1118, 736, 697$   $\text{cm}^{-1}$ .

$^1\text{H}$  NMR (400 MHz,  $\text{CDCl}_3$ ):  $\delta = 9.45$  (brs, 1H),  $8.64\text{--}8.57$  (m, 2H),  $7.86\text{--}7.78$  (m, 2H),  $7.60$  (s, 1H),  $7.54\text{--}7.49$  (m, 4H),  $7.40$  (t,  $J = 7.8$  Hz, 2H),  $6.70$  (brs, 1H),  $2.96\text{--}2.87$  (m, 2H),  $2.79\text{--}2.68$  (m, 2H),  $2.29\text{--}2.05$  (m, 2H) ppm.

$^{19}\text{F}$  NMR (376 MHz,  $\text{CDCl}_3$ ):  $\delta = -80.02$  (t,  $J = 8.9$  Hz, 3F),  $-116.56$  (q,  $J = 8.9$  Hz, 2F),  $-126.30$  (s, 2F) ppm.

$^{13}\text{C}$  NMR (100 MHz,  $\text{CDCl}_3$ ):  $\delta = 174.5, 168.9, 164.5, 163.3, 156.1$  (t,  $J_{\text{C-F}} = 27.0$  Hz),  $136.4, 134.0, 132.5, 131.5, 128.7, 128.7, 128.6, 127.2, 110.9, 81.8, 34.2, 13.8$  ppm, carbons corresponding to the  $\text{C}_3\text{F}_7$  group cannot be identified due to C-F coupling.

HRMS (m/z): calcd for  $\text{C}_{25}\text{H}_{20}\text{F}_7\text{N}_4\text{O}_2$   $[\text{M}+\text{H}]^+$  541.1469, found: 541.1468.

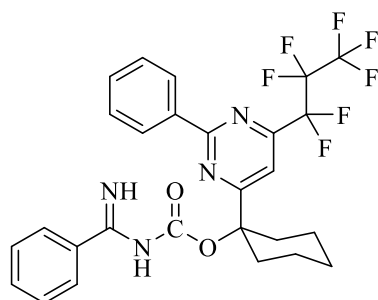

**1-(6-(Perfluoropropyl)-2-phenylpyrimidin-4-yl)cyclohexyl (imino(phenyl)methyl)carbamate (3la):**

Yield = 46% (78.6 mg). White solid. M.p. 115.1–115.7 °C.

Purified by flash column chromatography through silica gel (petroleum ether/ethyl acetate, 10/1).

IR (KBr):  $\nu = 3349, 2940, 1614, 1577, 1382, 1240, 1119, 965, 736, 695$   $\text{cm}^{-1}$ .



**<sup>1</sup>H NMR (400 MHz, CDCl<sub>3</sub>):**  $\delta$  = 9.39 (brs, 1H), 8.58-8.53 (m, 2H), 7.83-7.79 (m, 2H), 7.63 (s, 1H), 7.55-7.48 (m, 4H), 7.44-7.38 (m, 2H), 6.40 (brs, 1H), 2.46 (d,  $J$  = 13.5 Hz, 2H), 2.13 (td,  $J$  = 13.2, 3.9 Hz, 2H), 1.95-1.83 (m, 2H), 1.82-1.71 (m, 3H), 1.48-1.37 (m, 1H) ppm.

**<sup>19</sup>F NMR (376 MHz, CDCl<sub>3</sub>):**  $\delta$  = -80.04 (t,  $J$  = 8.9 Hz, 3F), -116.66 (q,  $J$  = 8.9 Hz, 2F), -126.42 (s, 2F) ppm.

**<sup>13</sup>C NMR (100 MHz, CDCl<sub>3</sub>):**  $\delta$  = 176.7, 168.7, 164.2, 163.4, 155.1 (t,  $J_{C-F}$  = 26.2 Hz), 136.5, 134.3, 132.2, 131.4, 128.6, 128.6, 128.5, 127.2, 112.0 (t,  $J_{C-F}$  = 4.3 Hz), 82.6, 34.7, 25.1, 21.6 ppm, carbons corresponding to the C<sub>3</sub>F<sub>7</sub> group cannot be identified due to C-F coupling.

**HRMS (m/z):** calcd for C<sub>27</sub>H<sub>24</sub>F<sub>7</sub>N<sub>4</sub>O<sub>2</sub> [M+H]<sup>+</sup> 569.1782, found: 569.1779.

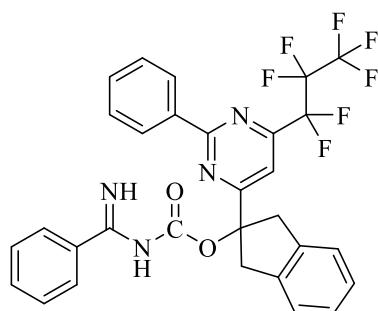

**2-(6-(Perfluoropropyl)-2-phenylpyrimidin-4-yl)-2,3-dihydro-1H-inden-2-yl (imino(phenyl)methyl)carbamate (3ma):**

Yield = 79% (143.1 mg). Yellow solid. M.p. 120.1–120.9 °C.

Purified by flash column chromatography through silica gel (petroleum ether/ethyl acetate, 10/1).

**IR (KBr):**  $\nu$  = 3358, 1654, 1617, 1577, 1514, 1377, 1279, 1230, 740, 695 cm<sup>-1</sup>.

**<sup>1</sup>H NMR (400 MHz, CDCl<sub>3</sub>):**  $\delta$  = 9.43 (brs, 1H), 8.48 (dd,  $J$  = 8.1, 1.7 Hz, 2H), 7.75 (d,  $J$  = 7.0 Hz, 2H), 7.72 (s, 1H), 7.52-7.43 (m, 4H), 7.35 (t,  $J$  = 7.8 Hz, 2H), 7.30-7.22 (m, 4H), 6.80 (brs, 1H), 4.02 (d,  $J$  = 17.1 Hz, 2H), 3.76 (d,  $J$  = 17.0 Hz, 2H) ppm.

**<sup>19</sup>F NMR (376 MHz, CDCl<sub>3</sub>):**  $\delta$  = -79.98 (t,  $J$  = 9.1 Hz, 3F), -116.57 (t,  $J$  = 8.9 Hz, 2F), -126.33 (s, 2H) ppm.

**<sup>13</sup>C NMR (100 MHz, CDCl<sub>3</sub>):**  $\delta$  = 174.5, 168.9, 164.2, 163.6, 156.2 (t,  $J_{C-F}$  = 26.0 Hz), 139.7, 136.1, 133.9, 132.5, 131.5, 128.7, 128.6, 128.5, 127.1, 127.0, 124.3, 111.6, 90.5, 45.2 ppm, carbons corresponding to the C<sub>3</sub>F<sub>7</sub> group cannot be identified due to C-F coupling.

**HRMS (m/z):** calcd for C<sub>30</sub>H<sub>22</sub>F<sub>7</sub>N<sub>4</sub>O<sub>2</sub> [M+H]<sup>+</sup> 603.1625, found: 603.1628.

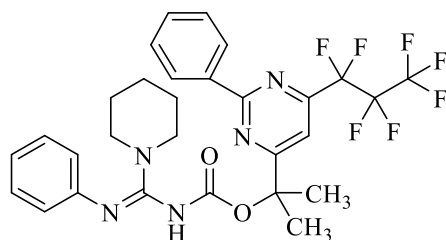

**(Z)-3-Methyl-3-(6-(perfluoropropyl)-2-phenylpyrimidin-4-yl)-N-((phenylimino)(piperidin-1-yl)methyl)butanamide (4):**

Yield = 30% (55.2 mg). White solid. M.p. 328.1–328.9 °C.

Purified by flash column chromatography through silica gel (petroleum ether/ethyl acetate, 10/1).

**IR (KBr):**  $\nu$  = 3470, 3414, 1735, 1637, 1618, 1388, 1273, 1226, 1121, 614 cm<sup>-1</sup>.

**<sup>1</sup>H NMR (400 MHz, CDCl<sub>3</sub>):**  $\delta$  = 8.53 (dd,  $J$  = 7.6, 2.2 Hz, 2H), 7.65 (s, 1H), 7.49 (d,  $J$  = 7.7 Hz, 3H), 7.29-7.23 (m, 3H), 7.06 (t,  $J$  = 7.4 Hz, 1H), 6.92 (d,  $J$  = 7.4 Hz, 2H), 3.24 (t,  $J$  = 5.4 Hz, 4H), 1.87 (s, 6H), 1.50 (q,  $J$  = 6.2 Hz, 2H), 1.43-1.36 (m, 4H) ppm.

**<sup>19</sup>F NMR (376 MHz, CDCl<sub>3</sub>):**  $\delta$  = -80.06 (t,  $J$  = 9.1 Hz, 3F), -116.65 (q,  $J$  = 9.2 Hz, 2F), -126.31 (s, 2F) ppm.

**<sup>13</sup>C NMR (100 MHz, CDCl<sub>3</sub>):**  $\delta$  = 177.3, 164.1, 162.3, 159.9, 155.5 (t,  $J_{C-F}$  = 26.2 Hz), 139.9, 136.5, 131.3, 129.3, 128.6, 128.5, 124.3, 121.2, 111.9, 80.8, 47.8, 27.5, 25.2, 24.1 ppm, carbons corresponding to the C<sub>3</sub>F<sub>7</sub> group cannot be identified due to C-F coupling.

**HRMS (m/z):** calcd for C<sub>29</sub>H<sub>29</sub>F<sub>7</sub>N<sub>5</sub>O<sub>2</sub> [M+H]<sup>+</sup> 612.2204, found: 612.2205.

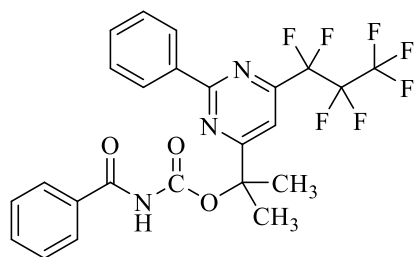

**2-(6-(Perfluoropropyl)-2-phenylpyrimidin-4-yl)propan-2-yl benzoylcarbamate (5):**

Yield = 56% (89.1 mg). White solid. M.p. 141.3–142.7 °C.

Purified by flash column chromatography through silica gel (petroleum ether/ethyl acetate, 10/1).

**IR (KBr):**  $\nu$  = 3275, 3085, 1753, 1729, 1700, 1573, 1555, 1389, 1333, 1230, 739, 695 cm<sup>-1</sup>.

**<sup>1</sup>H NMR (400 MHz, CDCl<sub>3</sub>):**  $\delta$  = 8.70 (s, 1H), 8.53 (d,  $J$  = 8.6 Hz, 2H), 7.94-7.80 (m, 3H), 7.60-7.37 (m, 6H), 1.97 (s, 6H) ppm.

**<sup>19</sup>F NMR (376 MHz, CDCl<sub>3</sub>):**  $\delta$  = -79.96 (t,  $J$  = 9.2 Hz, 3F), -116.23 (q,  $J$  = 9.3 Hz, 2F), -126.01 (s, 2F) ppm.

**<sup>13</sup>C NMR (100 MHz, CDCl<sub>3</sub>):**  $\delta$  = 174.5, 165.1, 164.5, 156.8 (t,  $J_{C-F}$  = 26.2 Hz), 150.1, 136.1, 133.0, 132.8, 131.6, 128.7, 128.6, 128.6, 127.7, 111.6, 84.0, 26.6 ppm, carbons corresponding to the C<sub>3</sub>F<sub>7</sub> group cannot be identified due to C-F coupling.

**HRMS (m/z):** calcd for C<sub>24</sub>H<sub>19</sub>F<sub>7</sub>N<sub>3</sub>O<sub>3</sub> [M+H]<sup>+</sup> 530.1309, found: 530.1305.

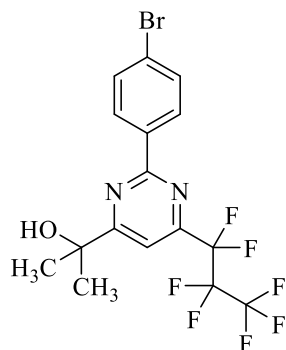

**2-(2-(4-Bromophenyl)-6-(perfluoropropyl)pyrimidin-4-yl)propan-2-ol (1p):**

Yield = 41% (57.3 mg). Yellow oil.

Purified by flash column chromatography through silica gel (petroleum ether/ethyl acetate, 50/1~20/1).

**IR (KBr):**  $\nu$  = 3626, 3438, 1654, 1587, 1560, 1388, 1232, 1122, 1012, 743 cm<sup>-1</sup>.

**<sup>1</sup>H NMR (400 MHz, CDCl<sub>3</sub>):**  $\delta$  = 8.43-8.35 (m, 2H), 7.74 (s, 1H), 7.67-7.61 (m, 2H), 3.64 (brs, 1H), 1.65 (s, 6H) ppm.

**<sup>19</sup>F NMR (376 MHz, CDCl<sub>3</sub>):**  $\delta$  = -80.00 (t,  $J$  = 9.5 Hz, 3F), -116.34 (q,  $J$  = 9.5 Hz, 2F), -126.03 (s, 2F) ppm.

**<sup>13</sup>C NMR (100 MHz, CDCl<sub>3</sub>):**  $\delta$  = 177.9, 163.3, 156.9 (t,  $J_{C-F}$  = 26.7 Hz), 134.8, 132.0, 130.1, 126.8, 111.5 (t,  $J_{C-F}$  = 4.6 Hz), 73.1, 30.0 ppm, carbons corresponding to the C<sub>3</sub>F<sub>7</sub> group cannot be identified due to C-F coupling.

**HRMS (m/z):** calcd for C<sub>16</sub>H<sub>13</sub>BrF<sub>7</sub>N<sub>2</sub>O [M+H]<sup>+</sup> 461.0094, found: 461.0099.

## Reference

[1] T. Xu, C. W. Cheung, X. Hu, Iron-Catalyzed 1,2-Addition of Perfluoroalkyl Iodides to Alkynes and Alkenes, *Angew. Chem. Int. Ed.* **2014**, *53*, 4910-4914.

[2] M. Baetena, B. U. W. Maes, Guanidine Synthesis: Use of Amidines as Guanylation Agents, *Adv. Synth. Catal.* **2016**, *358*, 826-833.

[3] X.-Q. Chu, D. Ge, Z.-L. Shen, T.-P. Loh, Recent Advances in Radical-Initiated C(sp<sup>3</sup>)-H Bond Oxidative Functionalization of Alkyl Nitriles, *ACS Catal.* **2018**, *8*, 258-271.

## The X-ray crystal structure of product 3ac

The single crystals were grown from the mixed solution of DCM and EtOAc (v/v = 1:3) by slowly evaporating the above solvents at room temperature.

### 2-(2-(2-Ethoxyphenyl)-6-(perfluoropropyl)pyrimidin-4-yl)propan-2-yl ((2-ethoxyphenyl)(imino)methyl)carbamate (3ac):

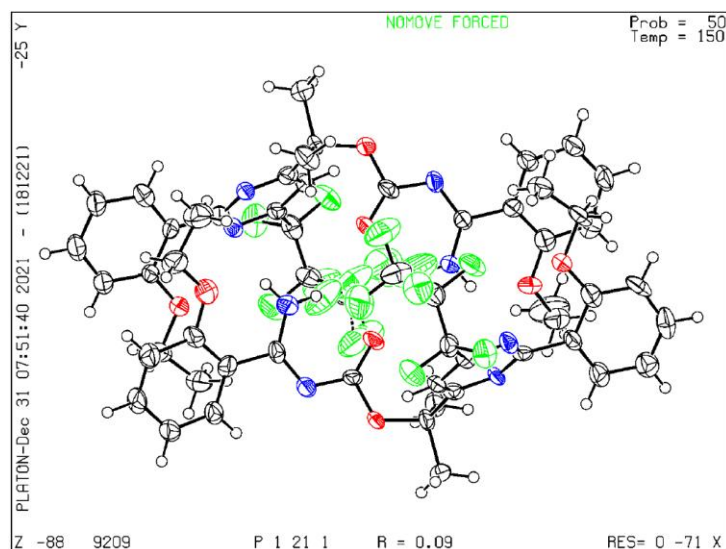

CCDC number: 2131913

**Table 1 Crystal data and structure refinement for 3ac.**

|                     |                                                                              |
|---------------------|------------------------------------------------------------------------------|
| Identification code | <b>3ac</b>                                                                   |
| Empirical formula   | C <sub>28</sub> H <sub>27</sub> F <sub>7</sub> N <sub>4</sub> O <sub>4</sub> |
| Formula weight      | 616.53                                                                       |
| Temperature/K       | 150.00(10)                                                                   |

|                                             |                                                               |
|---------------------------------------------|---------------------------------------------------------------|
| Crystal system                              | monoclinic                                                    |
| Space group                                 | P2 <sub>1</sub>                                               |
| a/Å                                         | 9.8007(8)                                                     |
| b/Å                                         | 19.4570(18)                                                   |
| c/Å                                         | 15.5025(12)                                                   |
| α/°                                         | 90                                                            |
| β/°                                         | 99.565(7)                                                     |
| γ/°                                         | 90                                                            |
| Volume/Å <sup>3</sup>                       | 2915.1(4)                                                     |
| Z                                           | 4                                                             |
| ρ <sub>calc</sub> /cm <sup>3</sup>          | 1.405                                                         |
| μ/mm <sup>-1</sup>                          | 0.125                                                         |
| F(000)                                      | 1272.0                                                        |
| Crystal size/mm <sup>3</sup>                | 0.15 × 0.13 × 0.12                                            |
| Radiation                                   | Mo Kα (λ = 0.71073)                                           |
| 2θ range for data collection/°              | 4.186 to 49.988                                               |
| Index ranges                                | -11 ≤ h ≤ 11, -23 ≤ k ≤ 22, -18 ≤ l ≤ 15                      |
| Reflections collected                       | 16749                                                         |
| Independent reflections                     | 9243 [R <sub>int</sub> = 0.1115, R <sub>sigma</sub> = 0.1485] |
| Data/restraints/parameters                  | 9243/61/812                                                   |
| Goodness-of-fit on F <sup>2</sup>           | 1.005                                                         |
| Final R indexes [I >= 2σ(I)]                | R <sub>1</sub> = 0.0926, wR <sub>2</sub> = 0.2199             |
| Final R indexes [all data]                  | R <sub>1</sub> = 0.1359, wR <sub>2</sub> = 0.2673             |
| Largest diff. peak/hole / e Å <sup>-3</sup> | 0.41/-0.37                                                    |
| Flack parameter                             | -1.8(10)                                                      |

### Crystal structure determination of [3ac]

**Crystal Data** for C<sub>28</sub>H<sub>27</sub>F<sub>7</sub>N<sub>4</sub>O<sub>4</sub> (*M* = 616.53 g/mol): monoclinic, space group P2<sub>1</sub> (no. 4), *a* = 9.8007(8) Å, *b* = 19.4570(18) Å, *c* = 15.5025(12) Å, β = 99.565(7)°, *V* = 2915.1(4) Å<sup>3</sup>, *Z* = 4, *T* = 150.00(10) K, μ(Mo Kα) = 0.125 mm<sup>-1</sup>, *D*<sub>calc</sub> = 1.405 g/cm<sup>3</sup>, 16749 reflections measured (4.186° ≤ 2θ ≤ 49.988°), 9243 unique (*R*<sub>int</sub> = 0.1115, *R*<sub>sigma</sub> = 0.1485) which were used in all calculations. The final *R*<sub>1</sub> was 0.0926 (*I* > 2σ(*I*)) and *wR*<sub>2</sub> was 0.2673 (all data).



<sup>13</sup>C NMR spectra of the product **3aa**

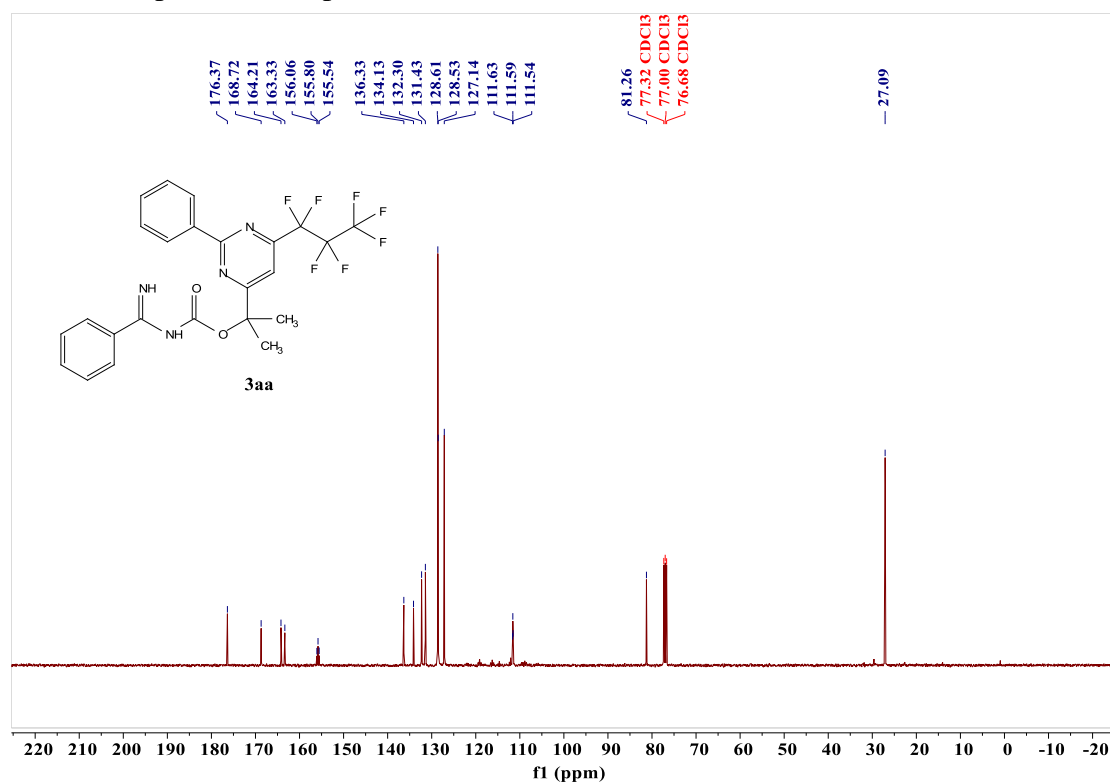

<sup>1</sup>H NMR spectra of the product **3ab**

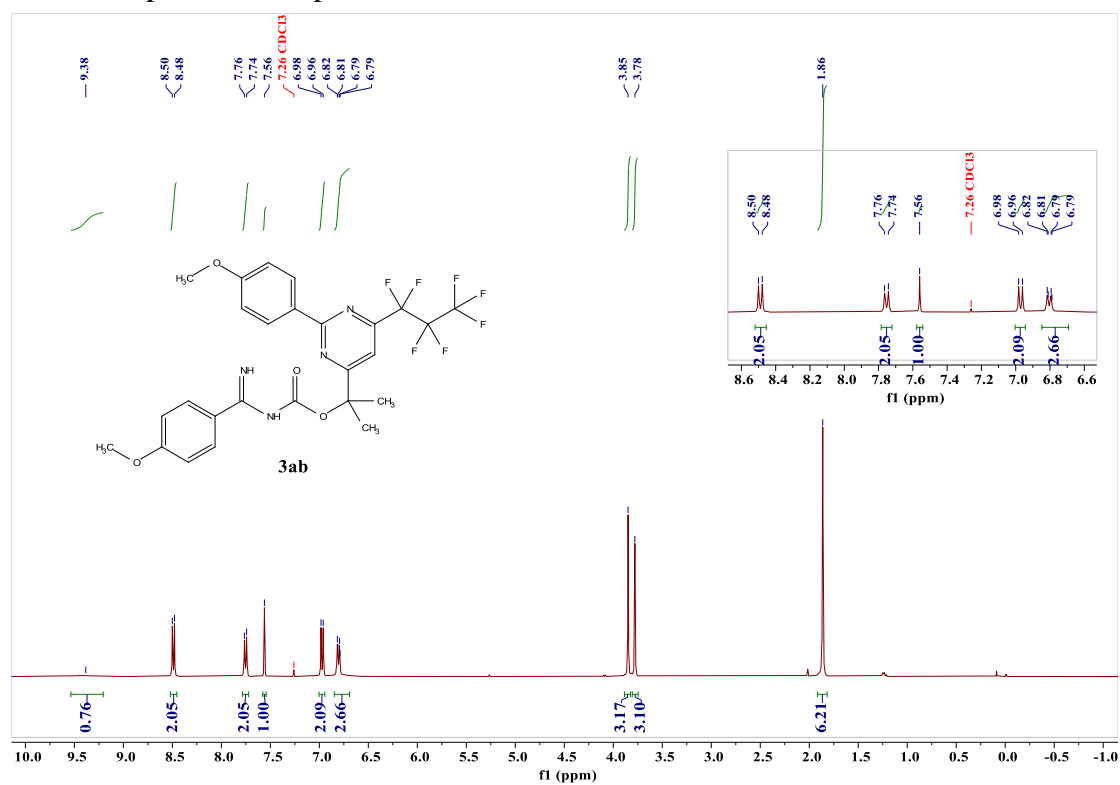

### <sup>19</sup>F NMR spectra of the product **3ab**

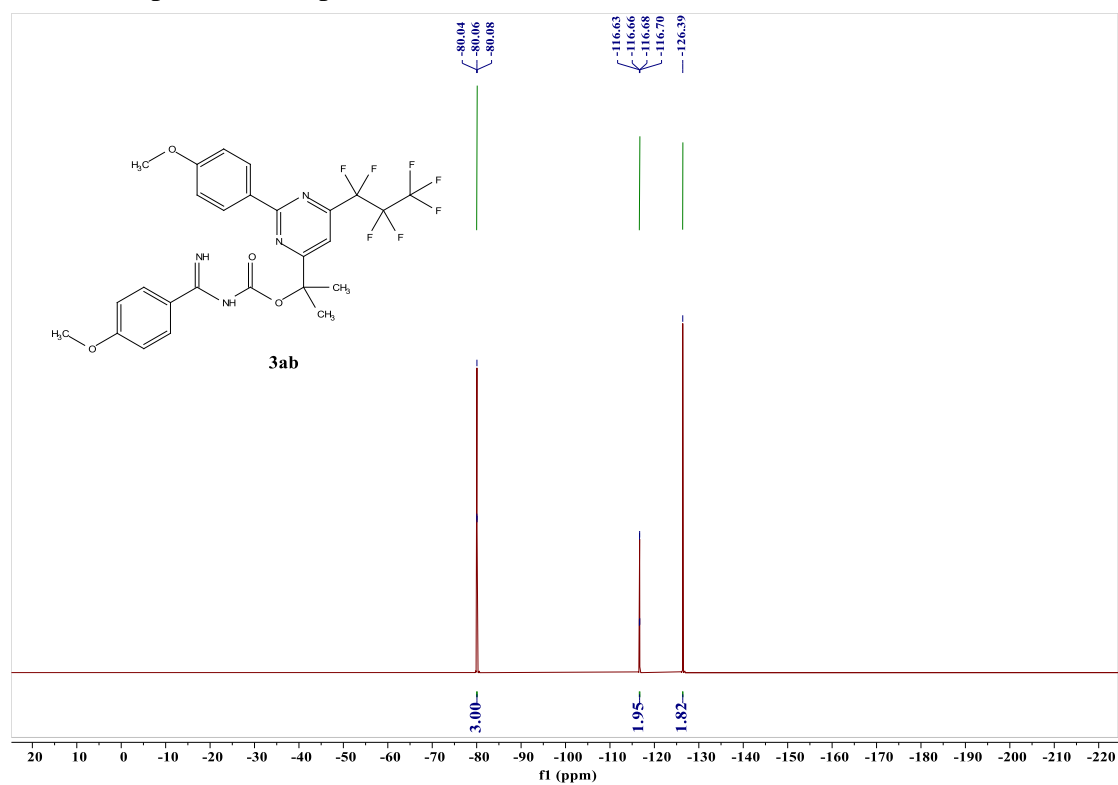

### <sup>13</sup>C NMR spectra of the product **3ab**

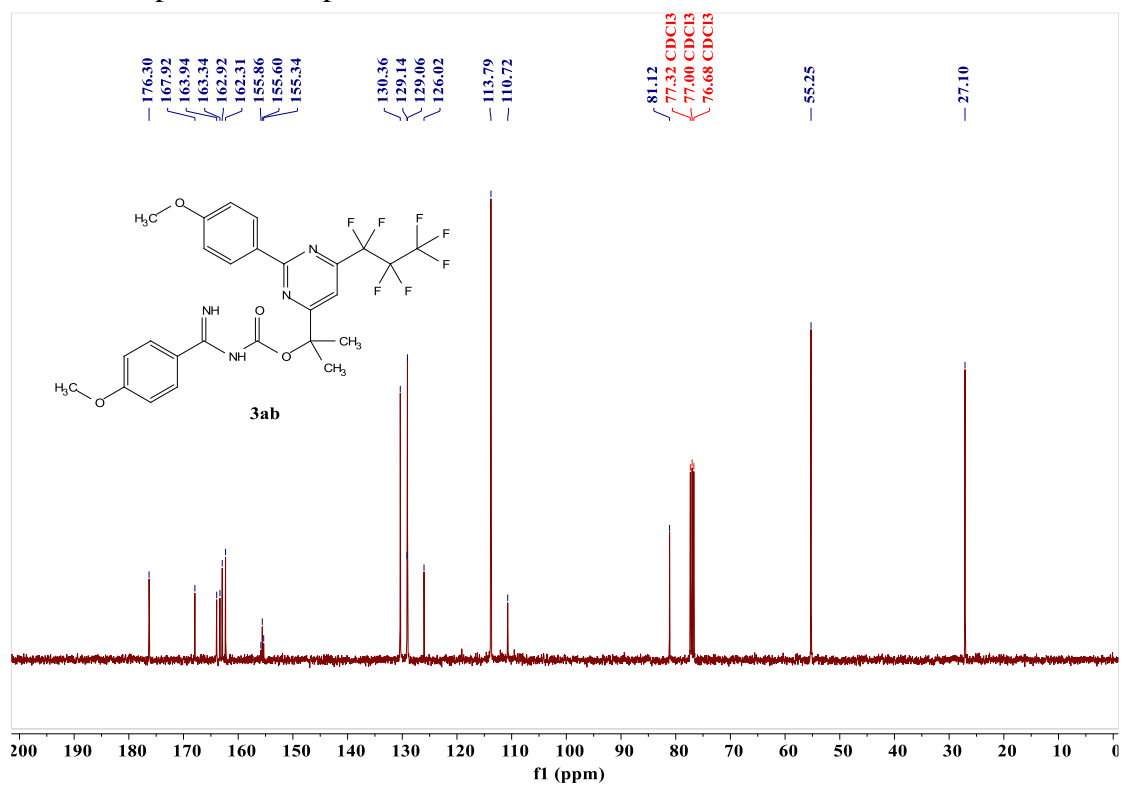

### $^1\text{H}$ NMR spectra of the product **3ac**

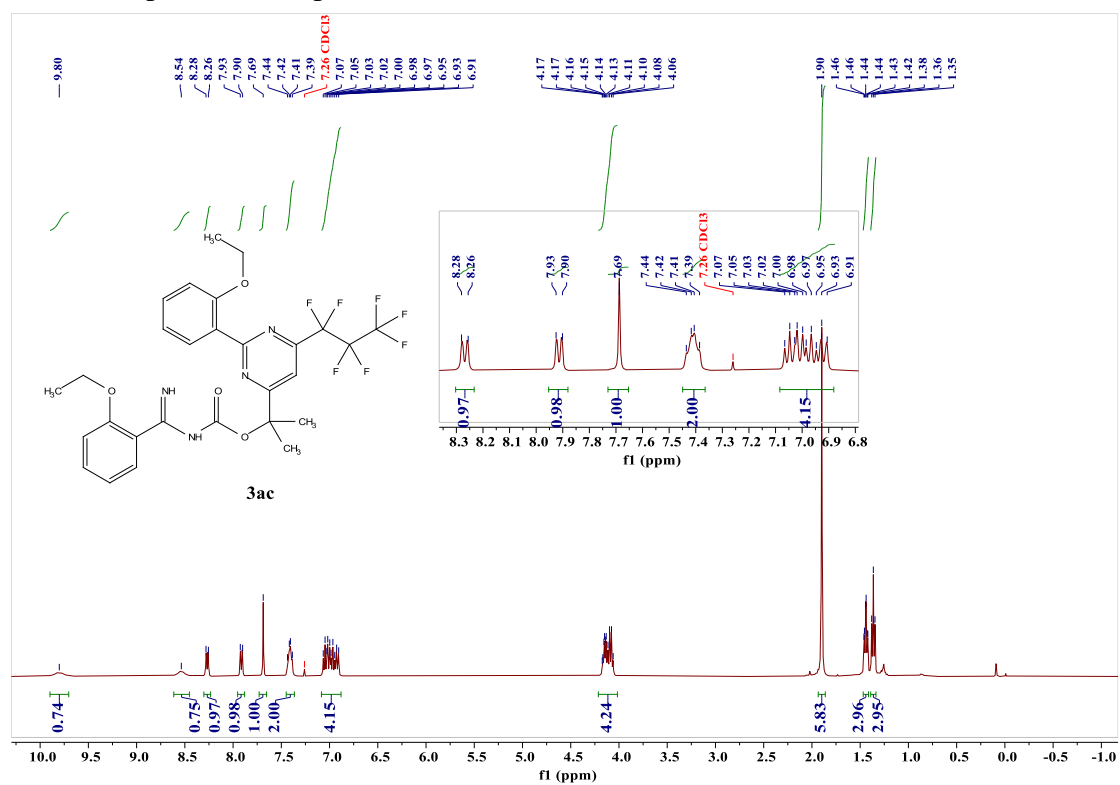

### $^{19}\text{F}$ NMR spectra of the product **3ac**

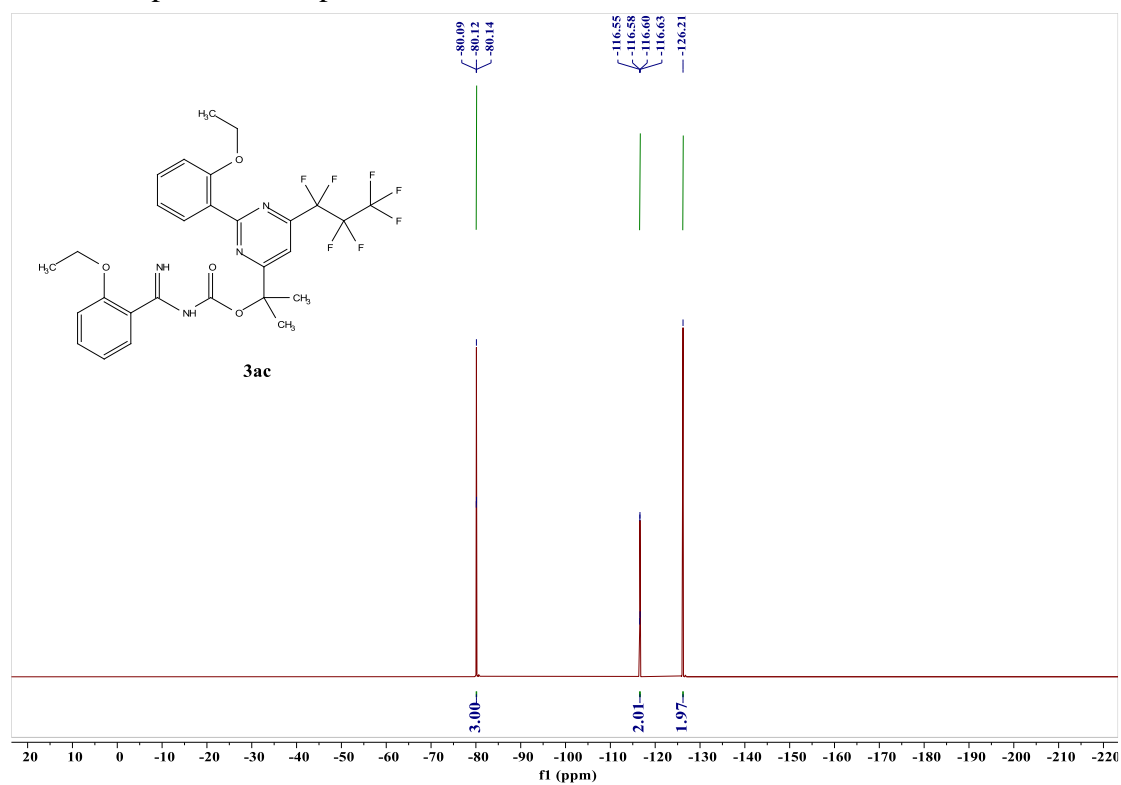



<sup>13</sup>C NMR spectra of the product **3ac**

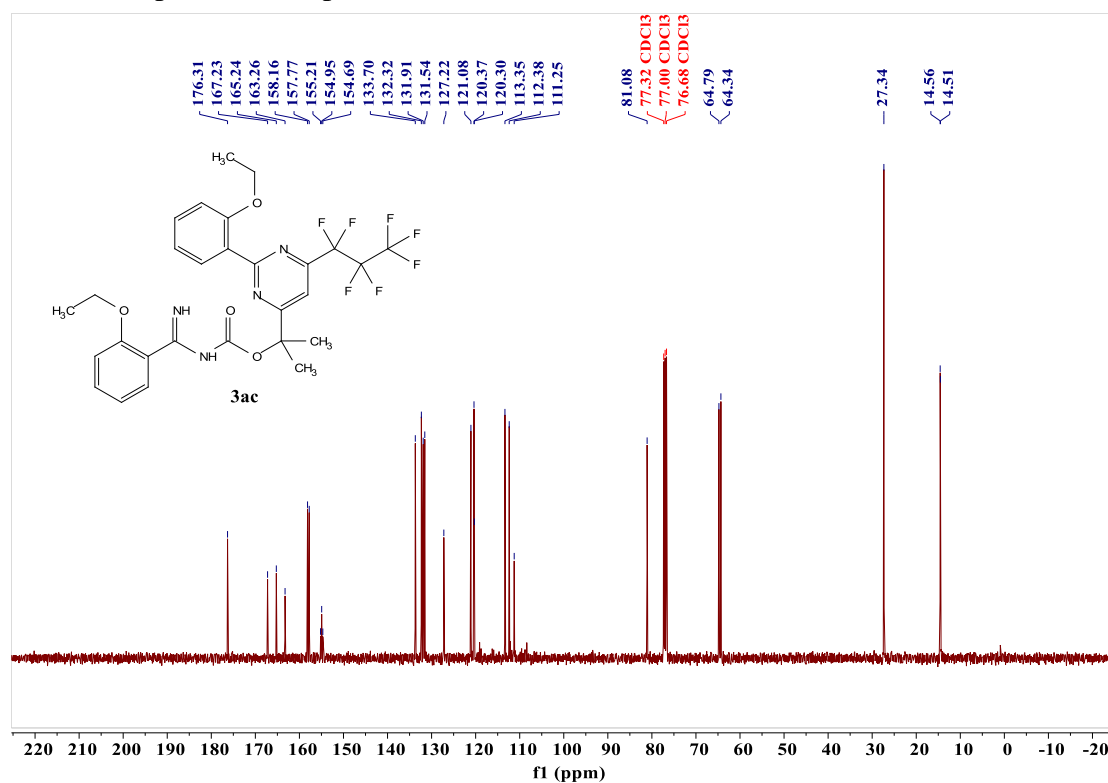

<sup>1</sup>H NMR spectra of the product **3ad**

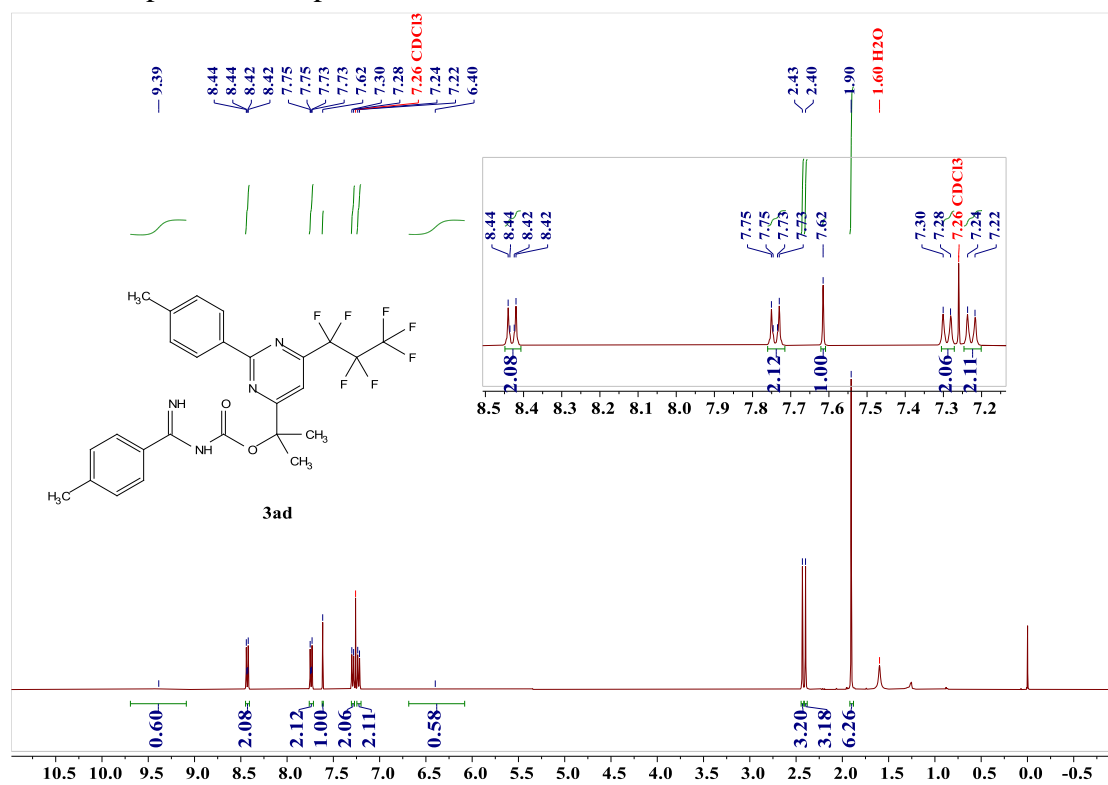

### $^{19}\text{F}$ NMR spectra of the product **3ad**

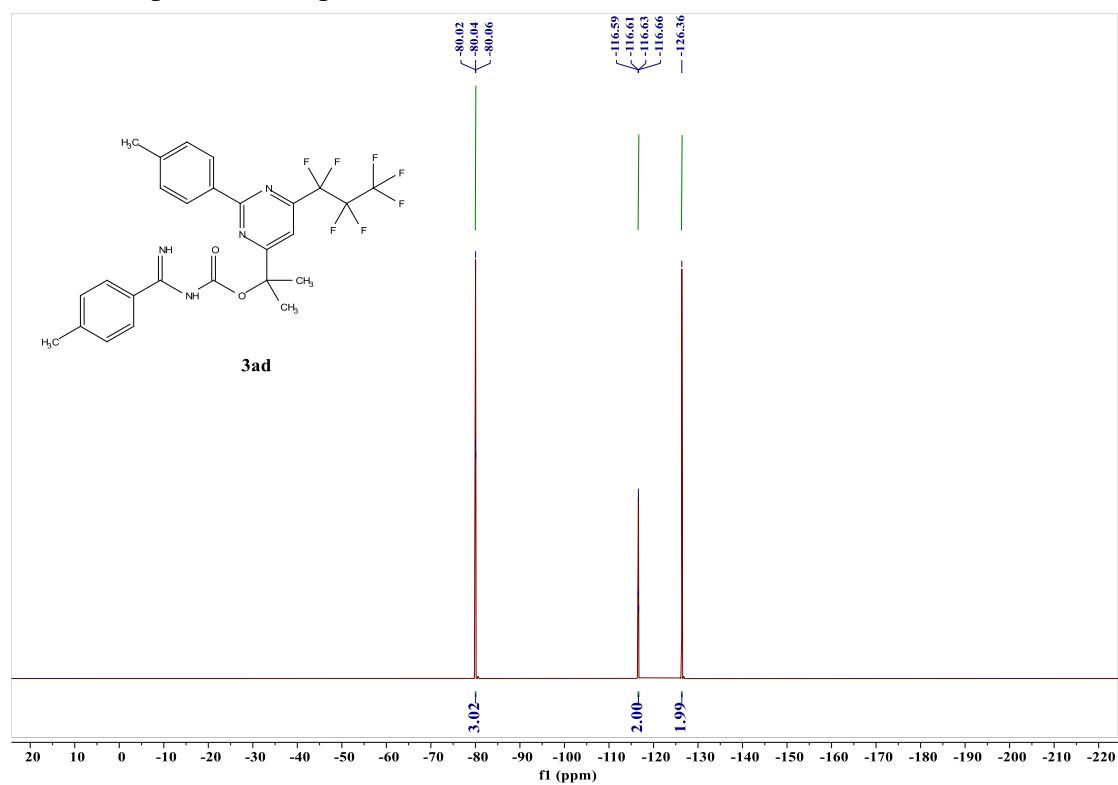

### $^{13}\text{C}$ NMR spectra of the product **3ad**

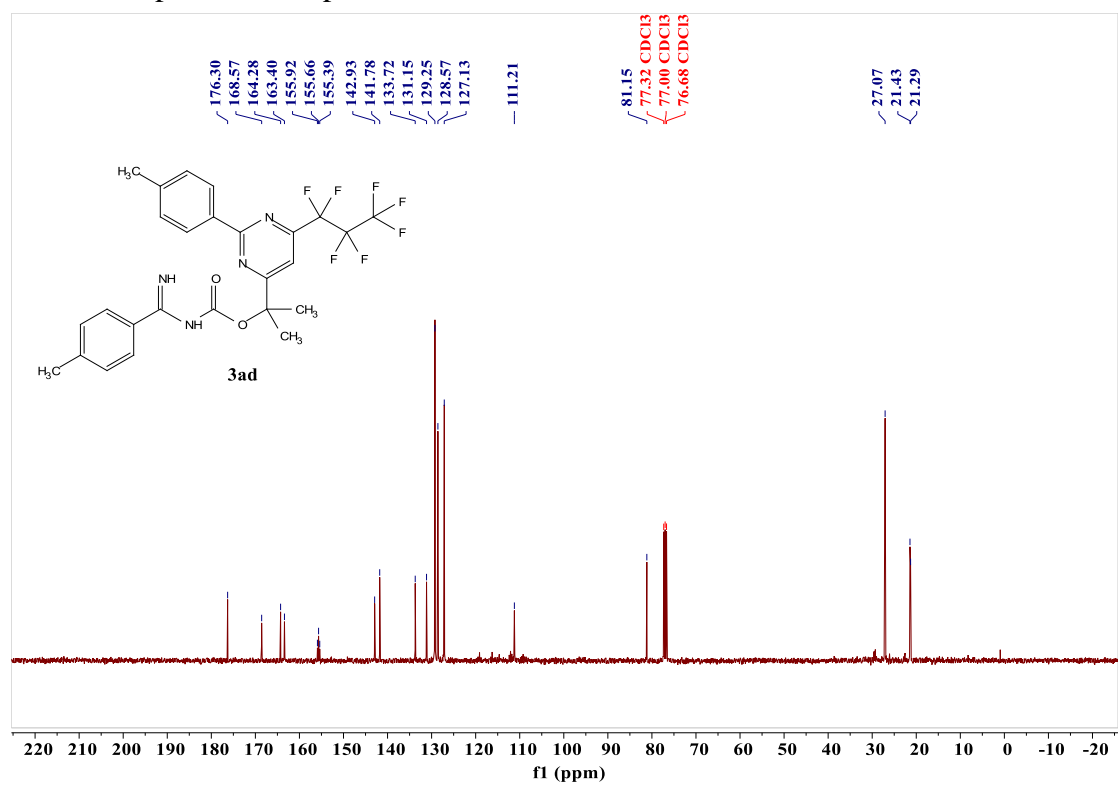

### $^1\text{H}$ NMR spectra of the product **3ae**

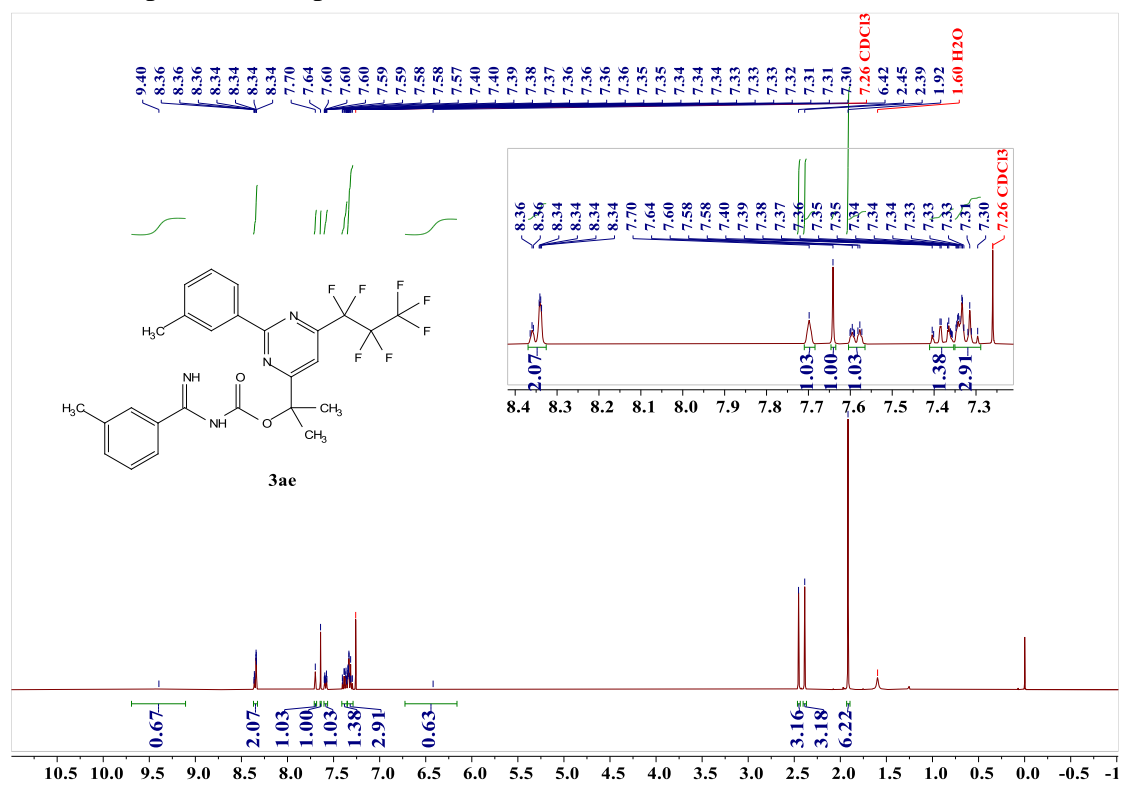

### $^{19}\text{F}$ NMR spectra of the product **3ae**

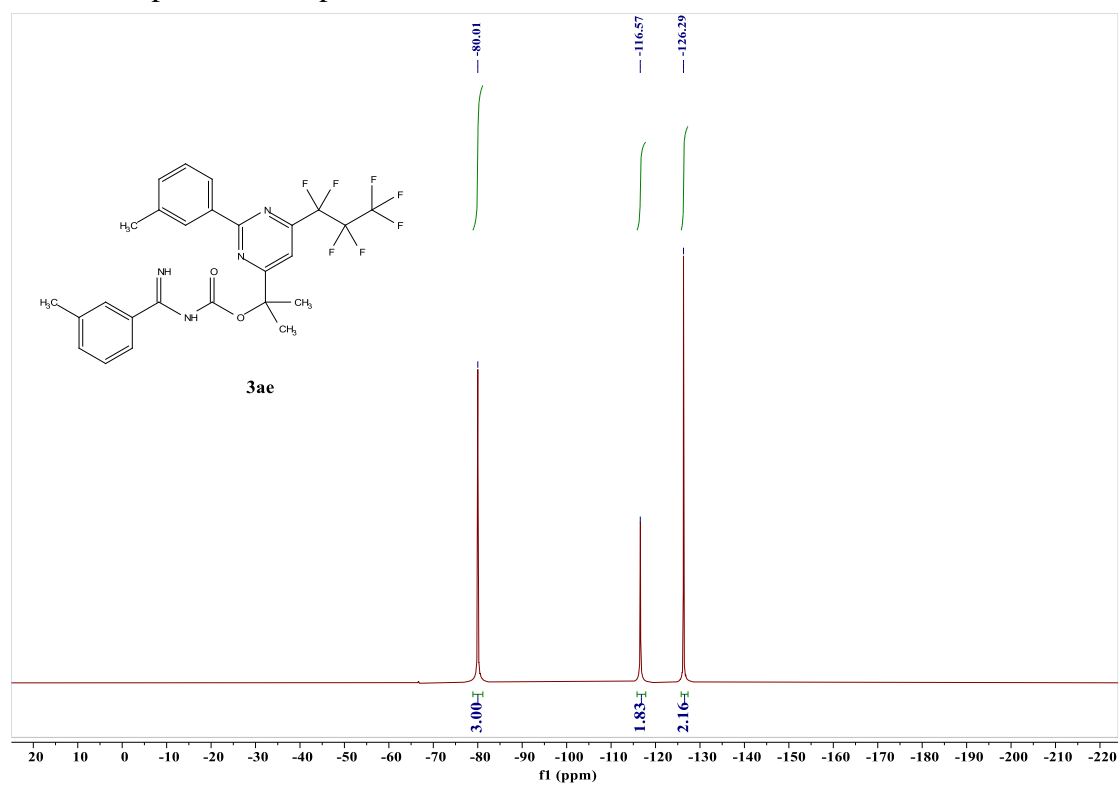

### $^{13}\text{C}$ NMR spectra of the product **3ae**

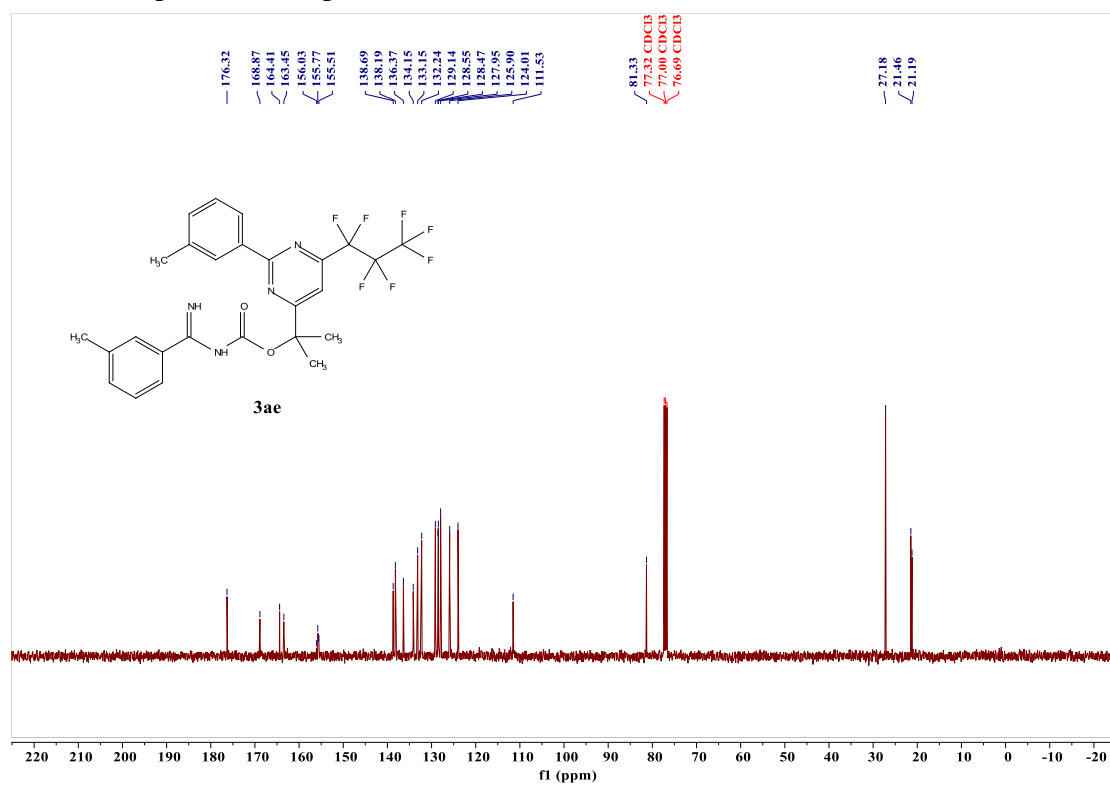

### $^1\text{H}$ NMR spectra of the product **3af**

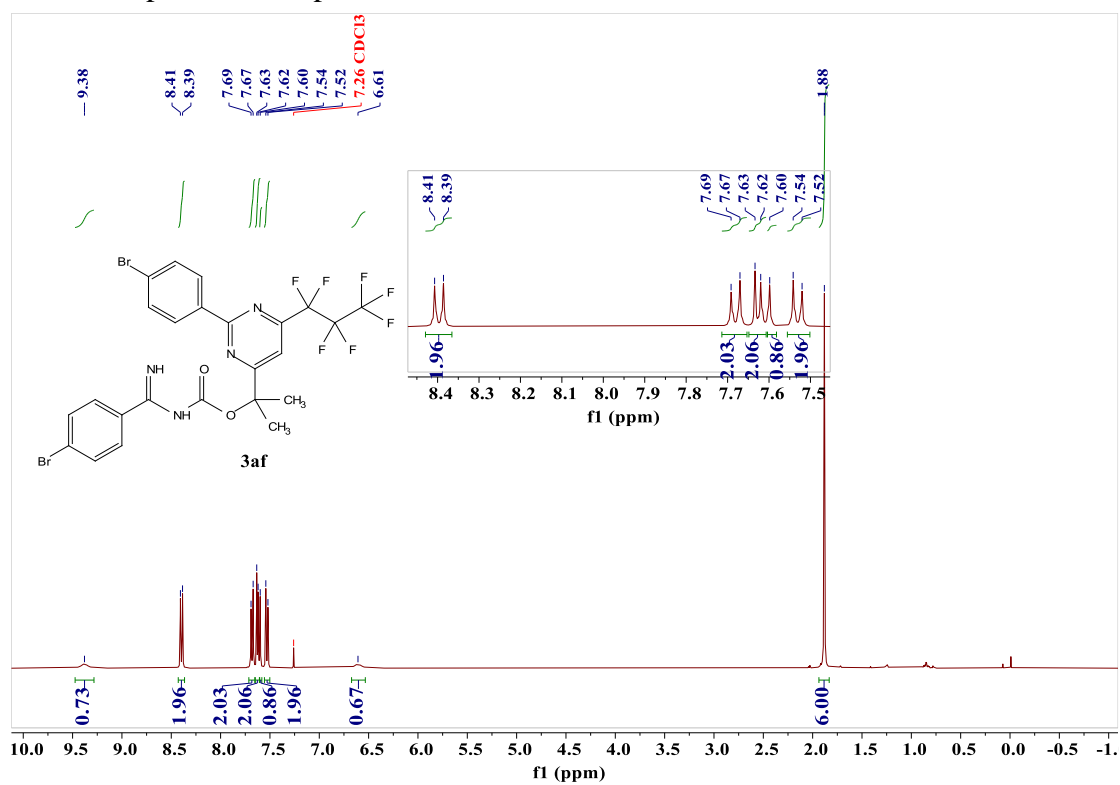

### <sup>19</sup>F NMR spectra of the product **3af**

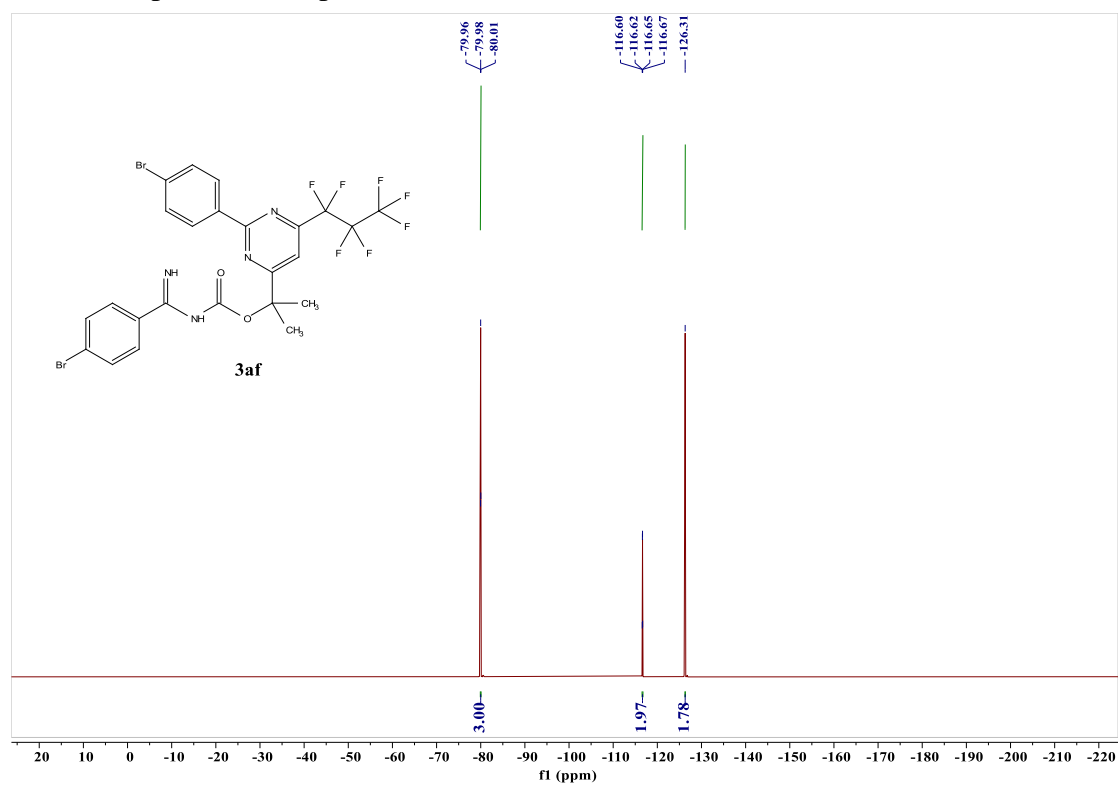

### <sup>13</sup>C NMR spectra of the product **3af**

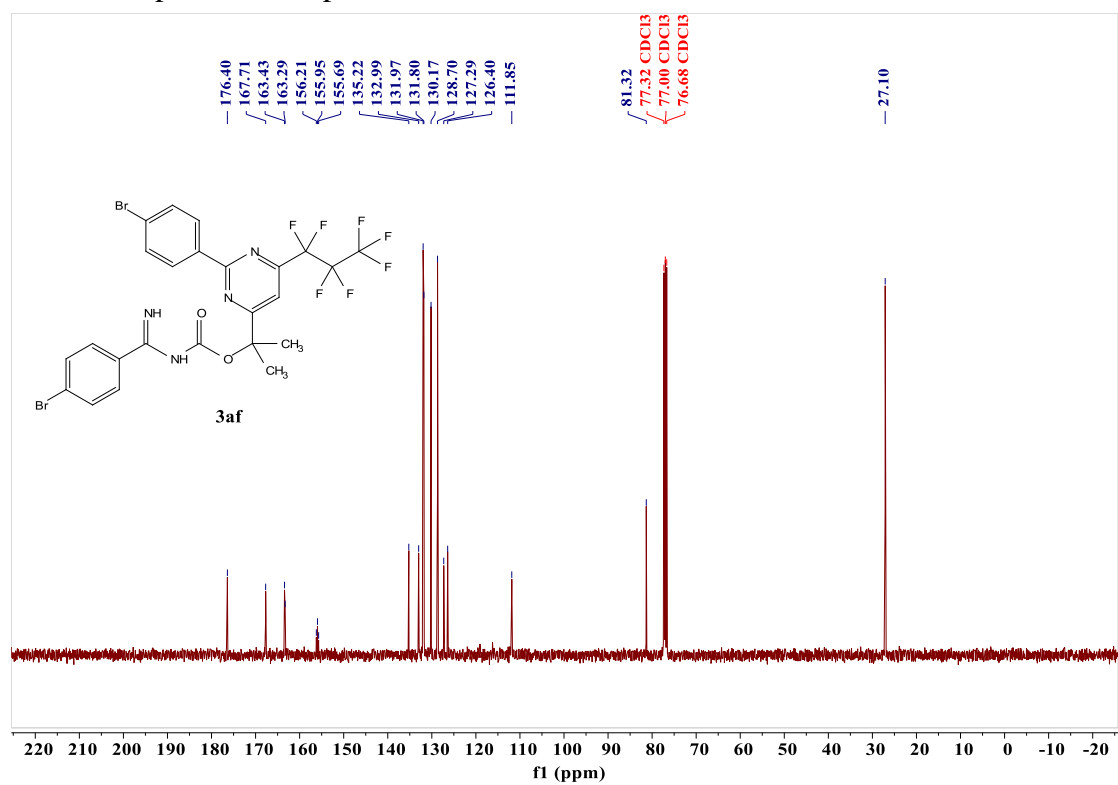

### $^1\text{H}$ NMR spectra of the product **3ag**

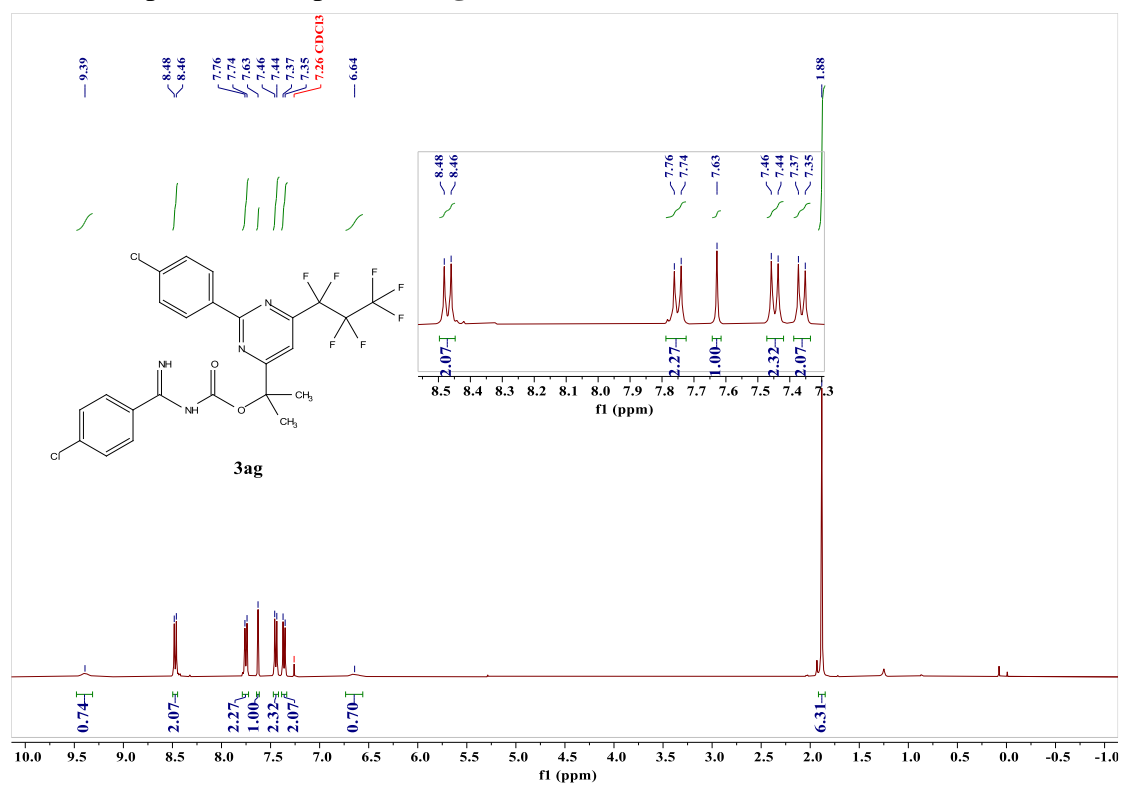

### $^{19}\text{F}$ NMR spectra of the product **3ag**

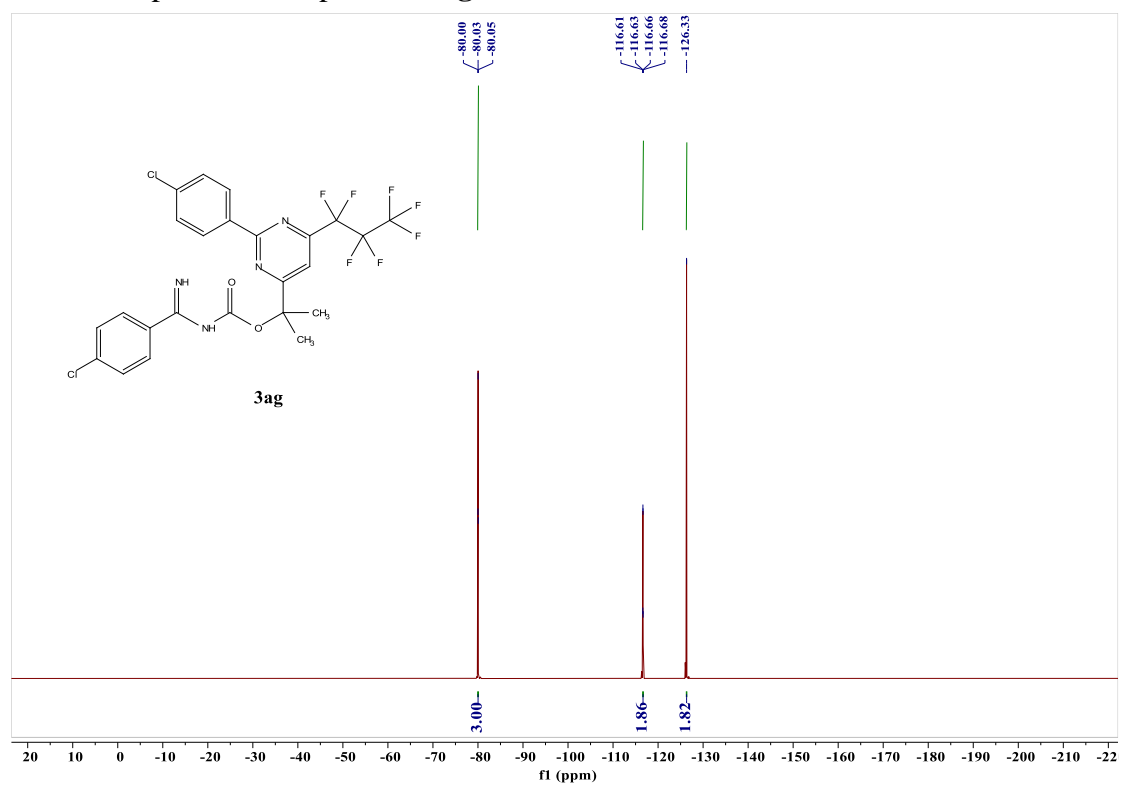



### <sup>19</sup>F NMR spectra of the product **3ah**

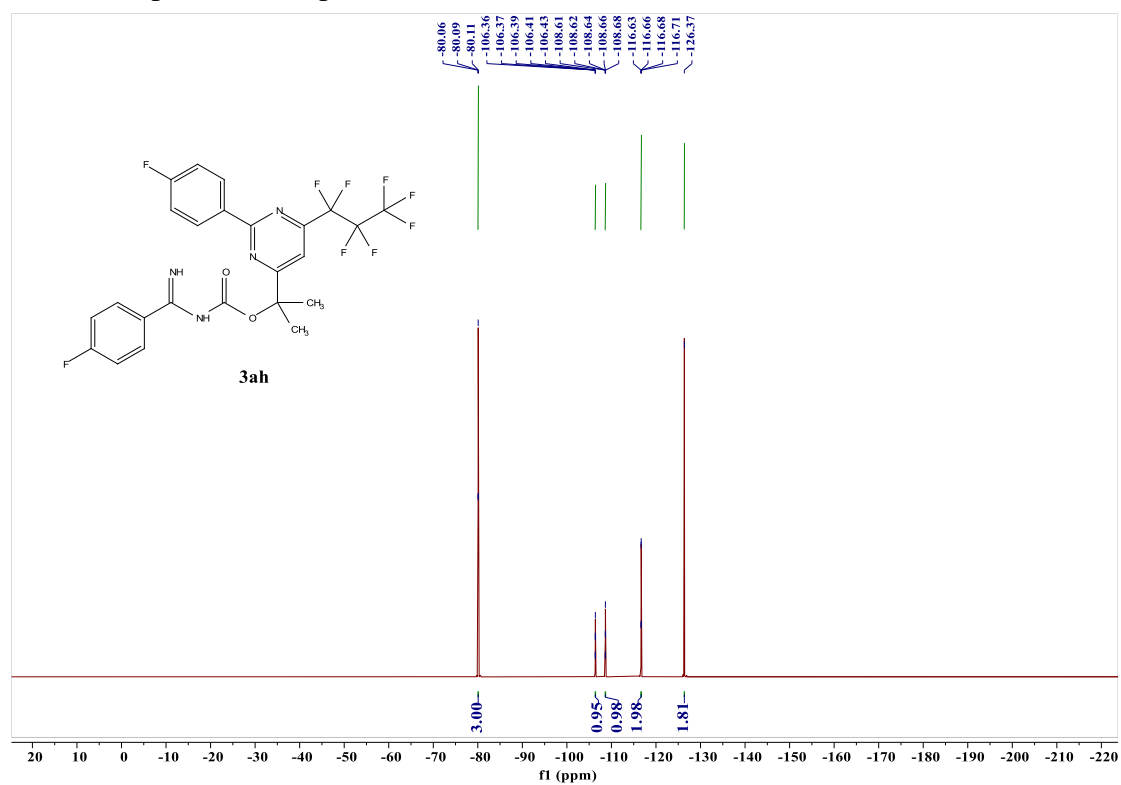

### <sup>13</sup>C NMR spectra of the product **3ah**

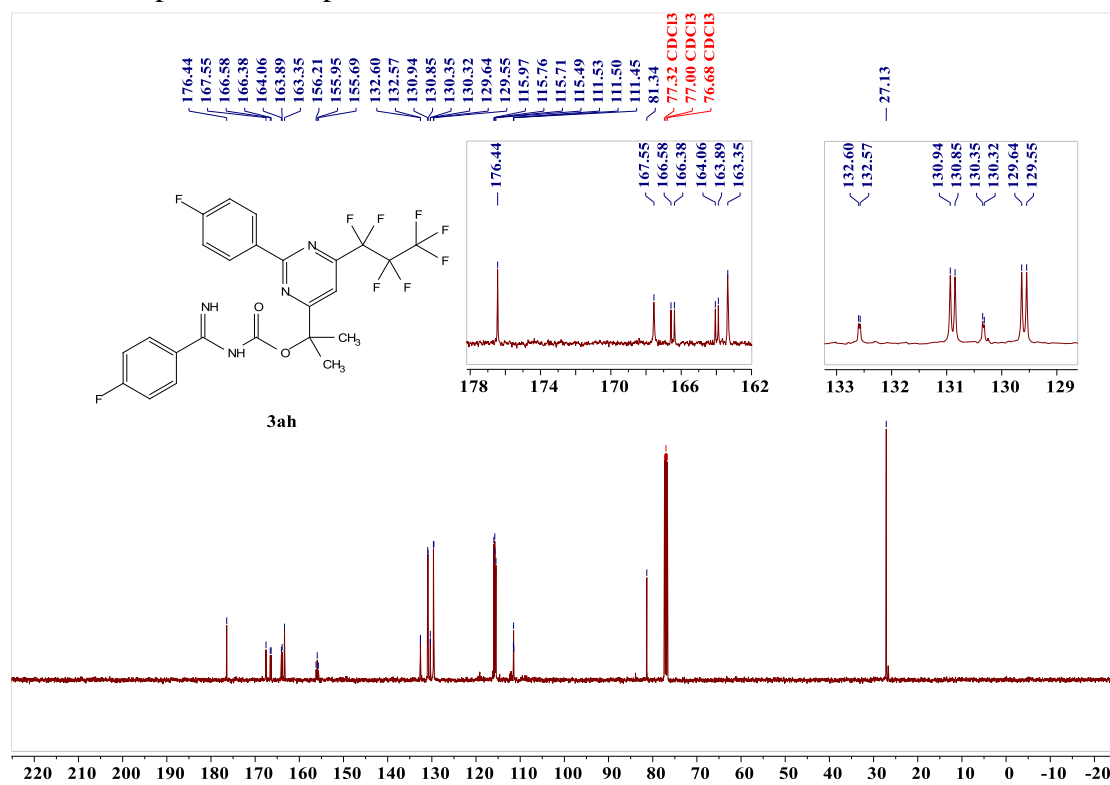



### $^1\text{H}$ NMR spectra of the product **3ai**

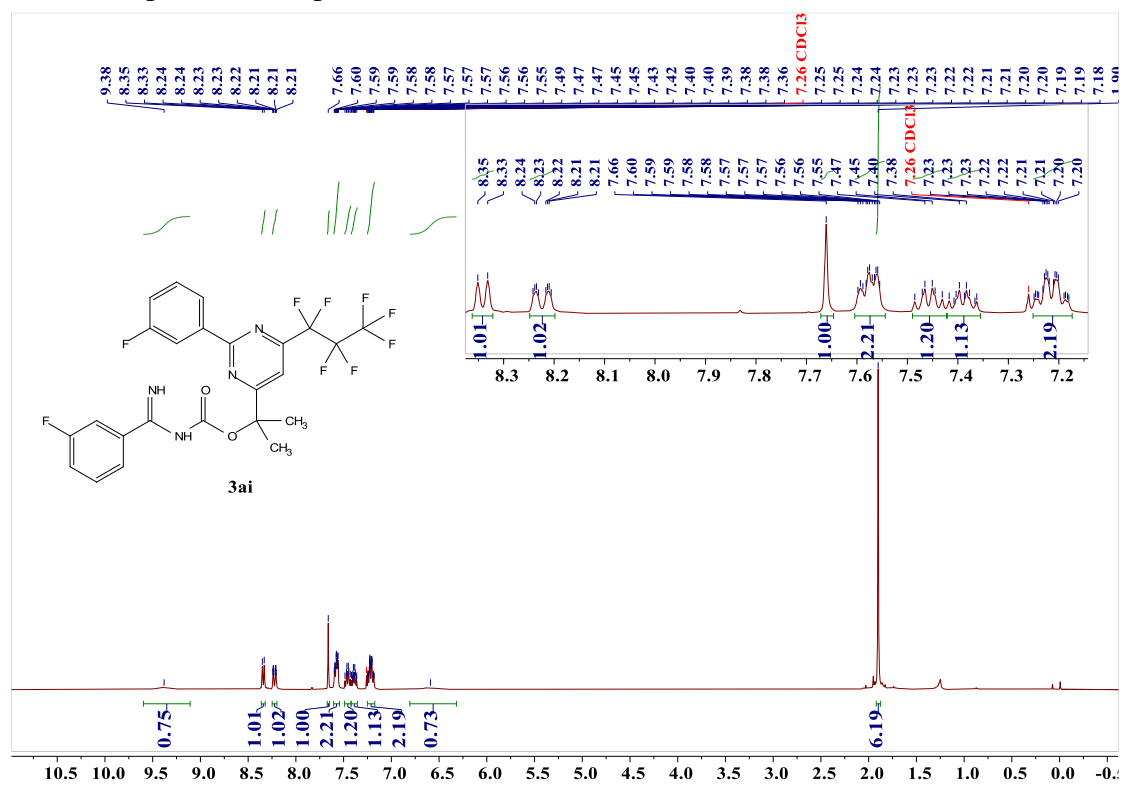

### $^{19}\text{F}$ NMR spectra of the product **3ai**

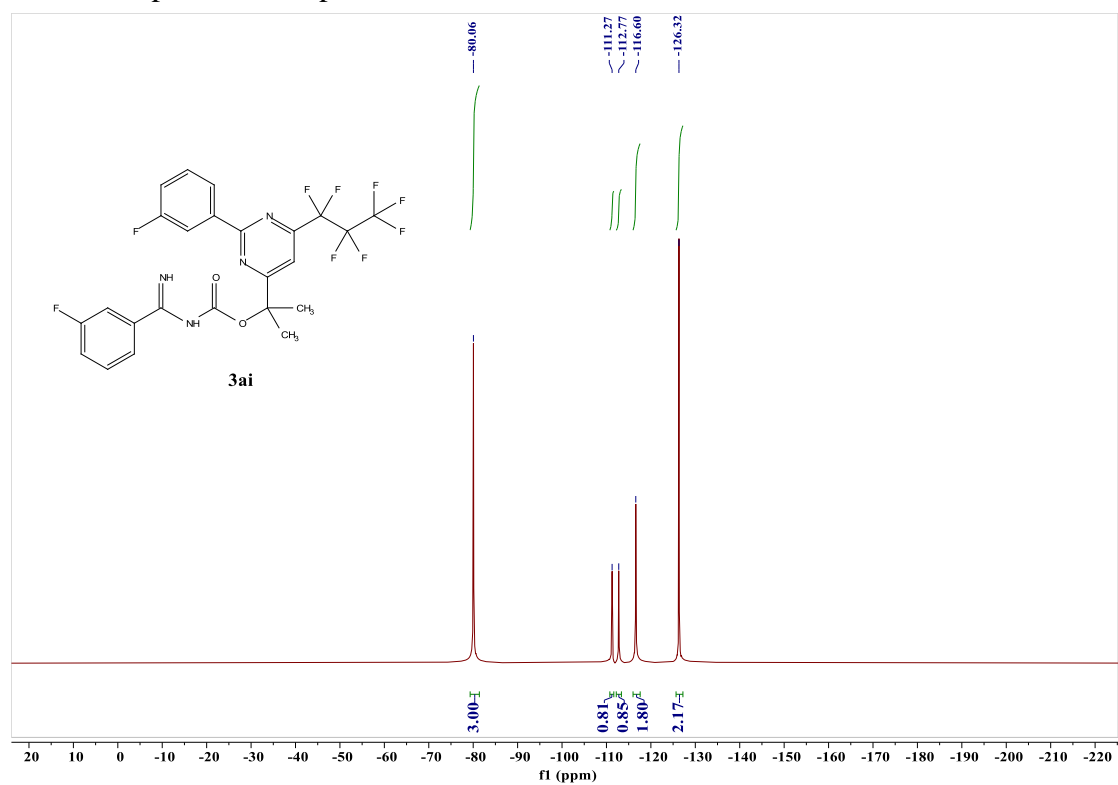

### $^{13}\text{C}$ NMR spectra of the product **3ai**

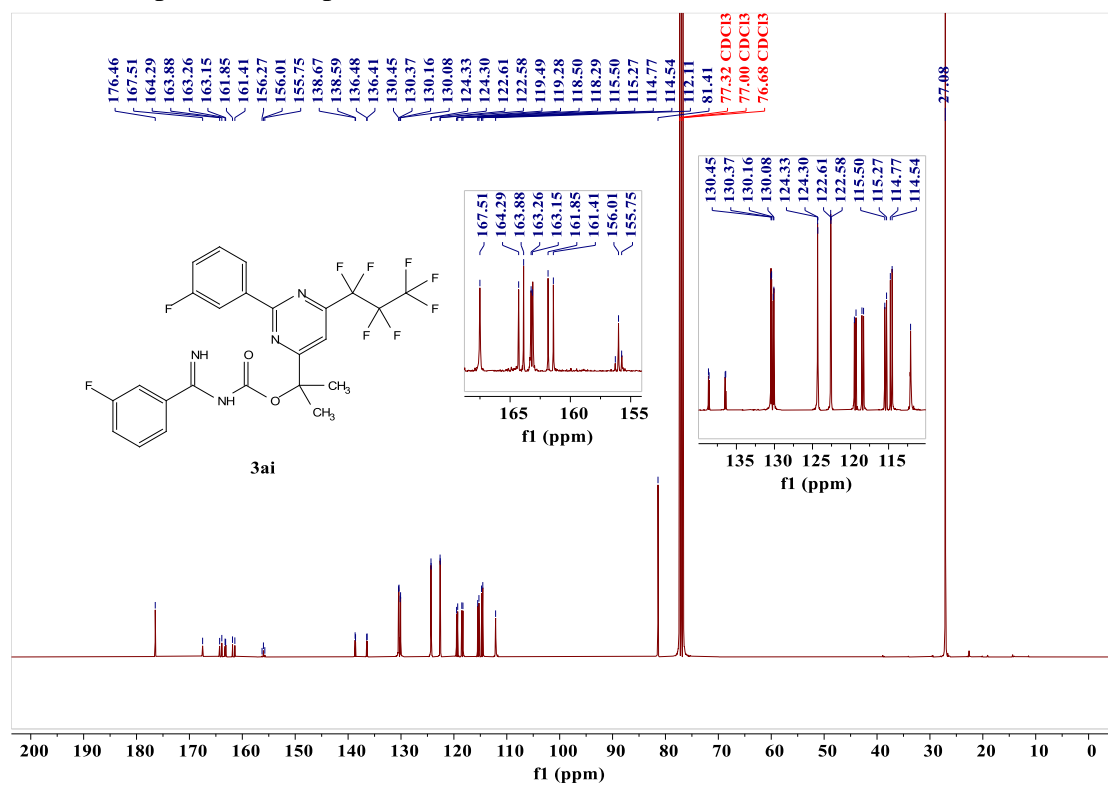

### $^1\text{H}$ NMR spectra of the product **3aj**

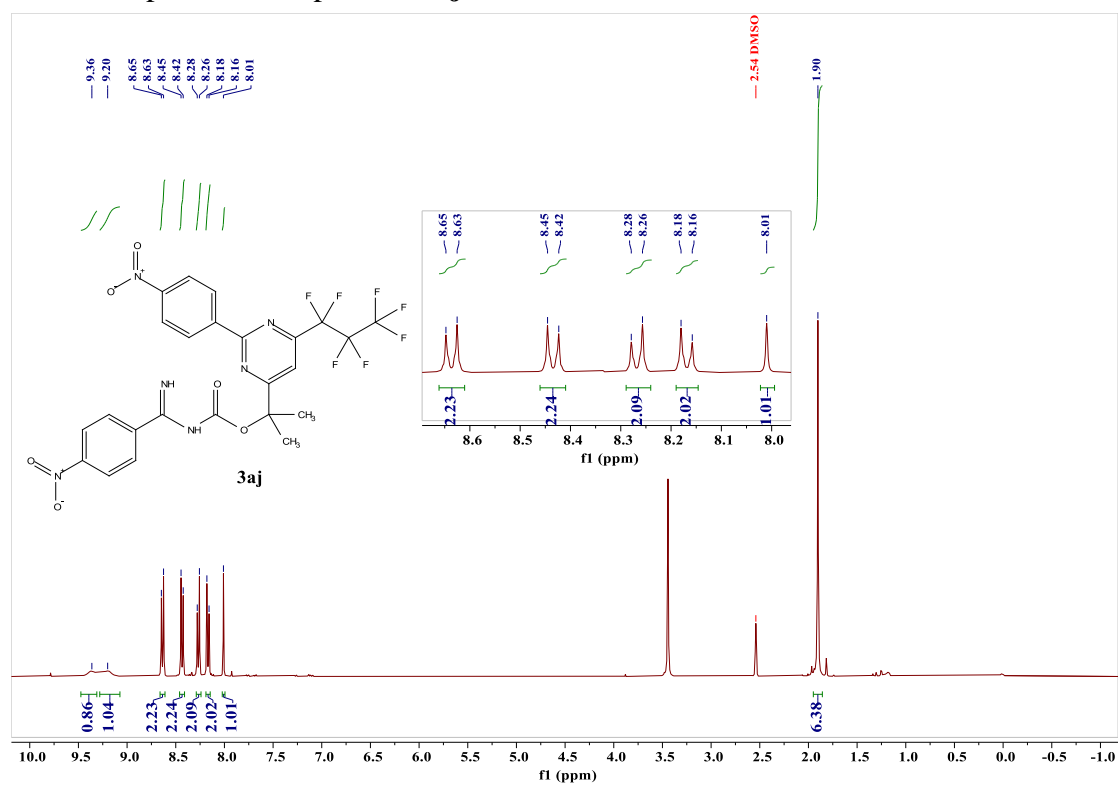

<sup>19</sup>F NMR spectra of the product **3aj**

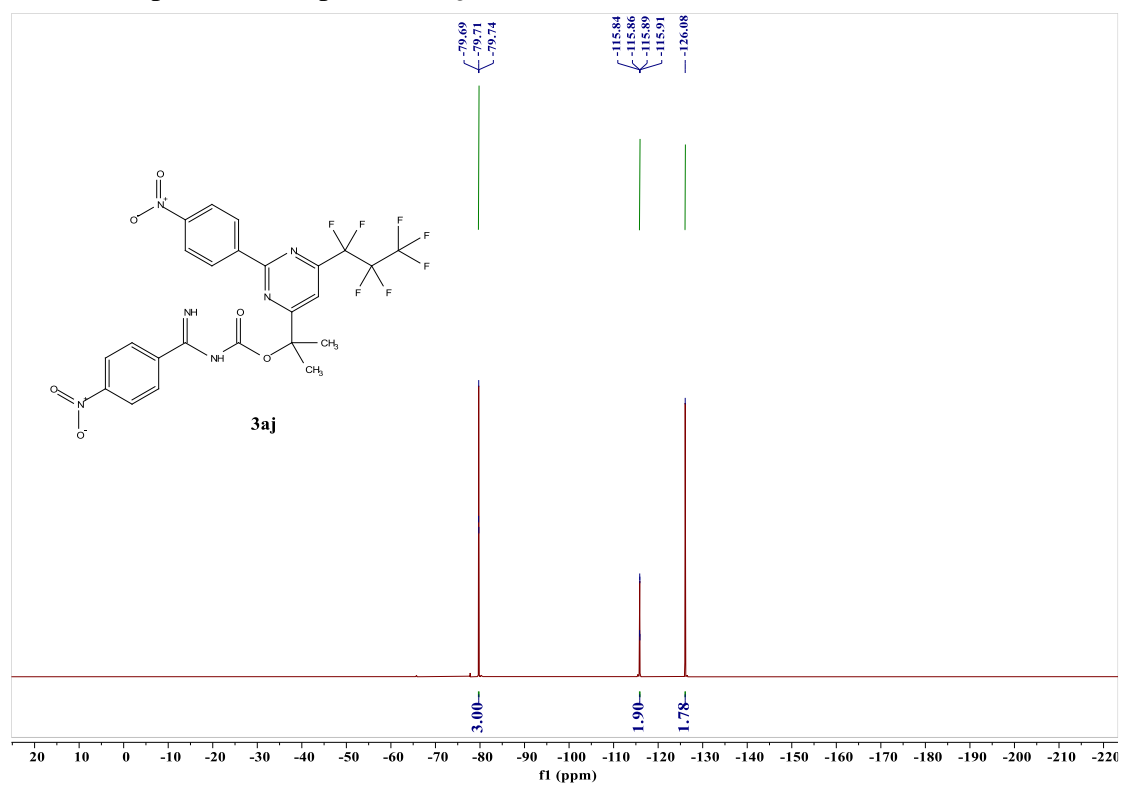

<sup>13</sup>C NMR spectra of the product **3aj**

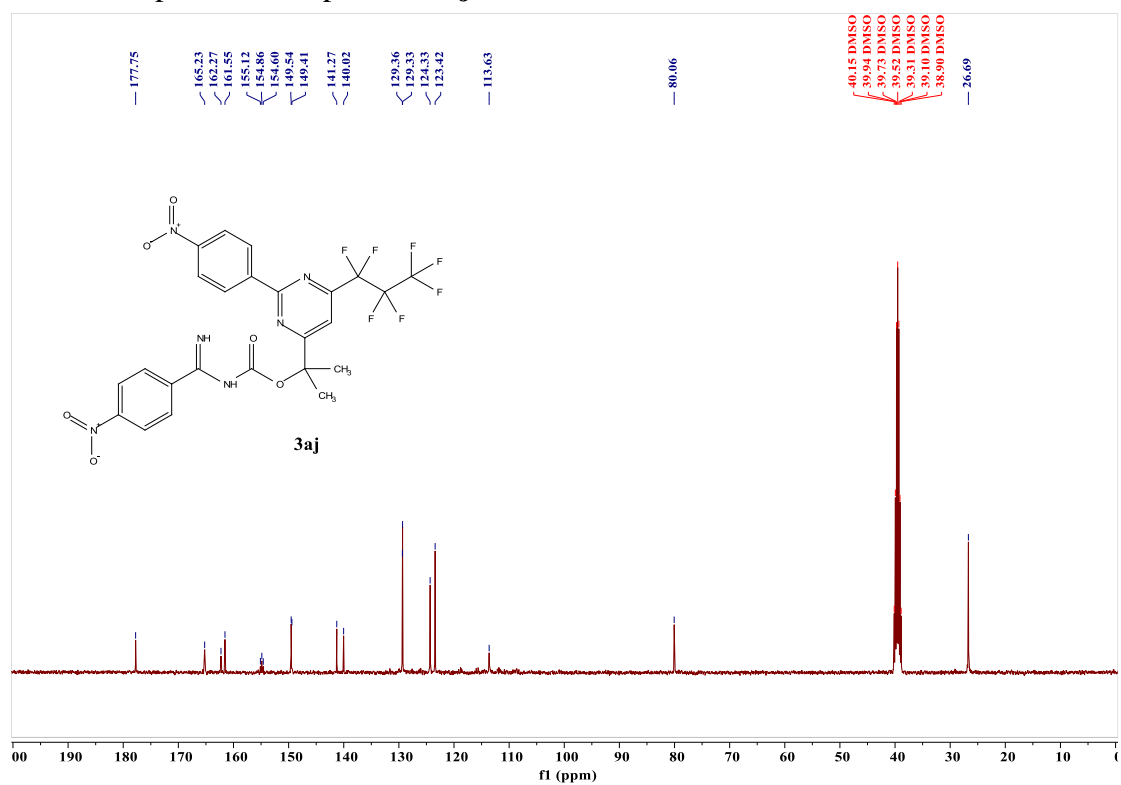



<sup>13</sup>C NMR spectra of the product **3ak**

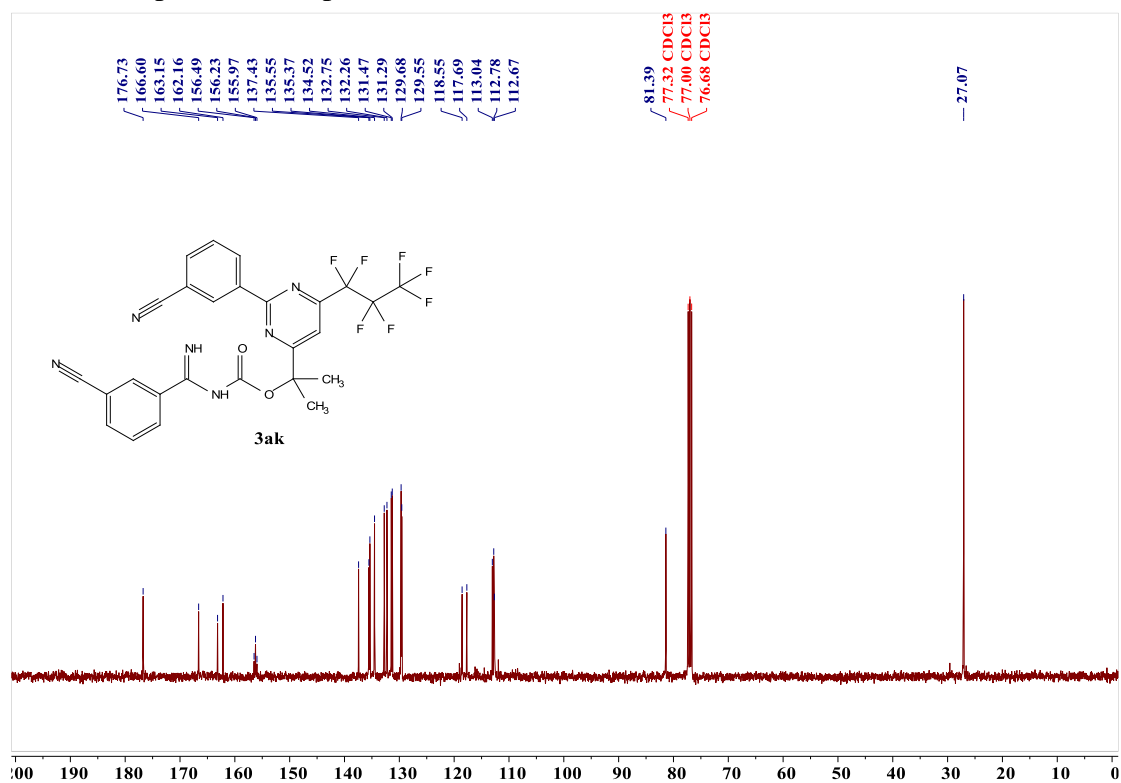

<sup>1</sup>H NMR spectra of the product **3al**

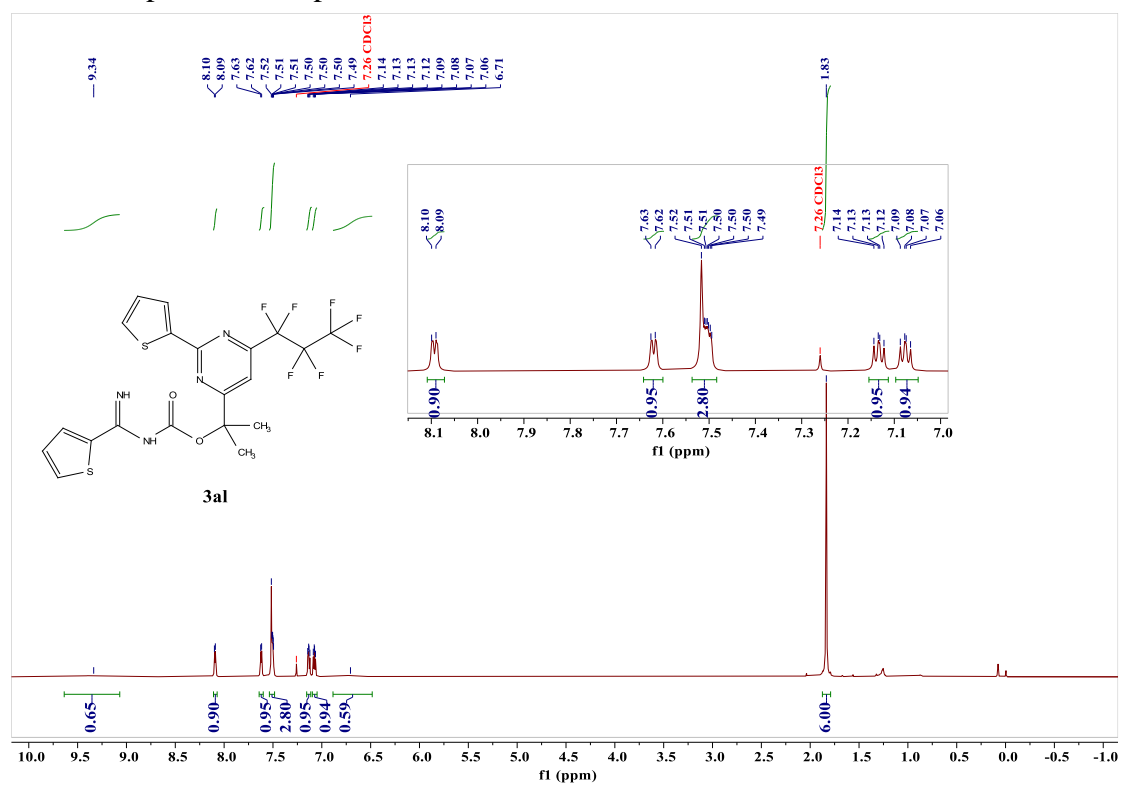

### <sup>19</sup>F NMR spectra of the product **3al**

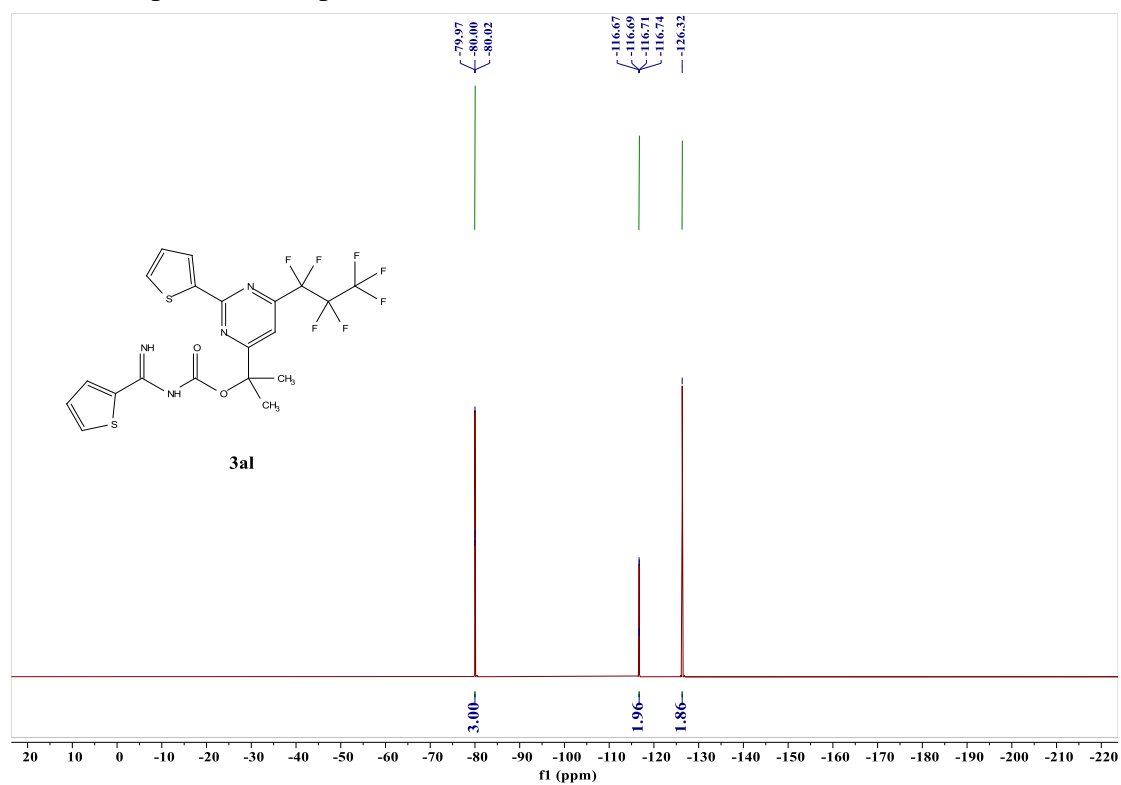

### <sup>13</sup>C NMR spectra of the product **3al**

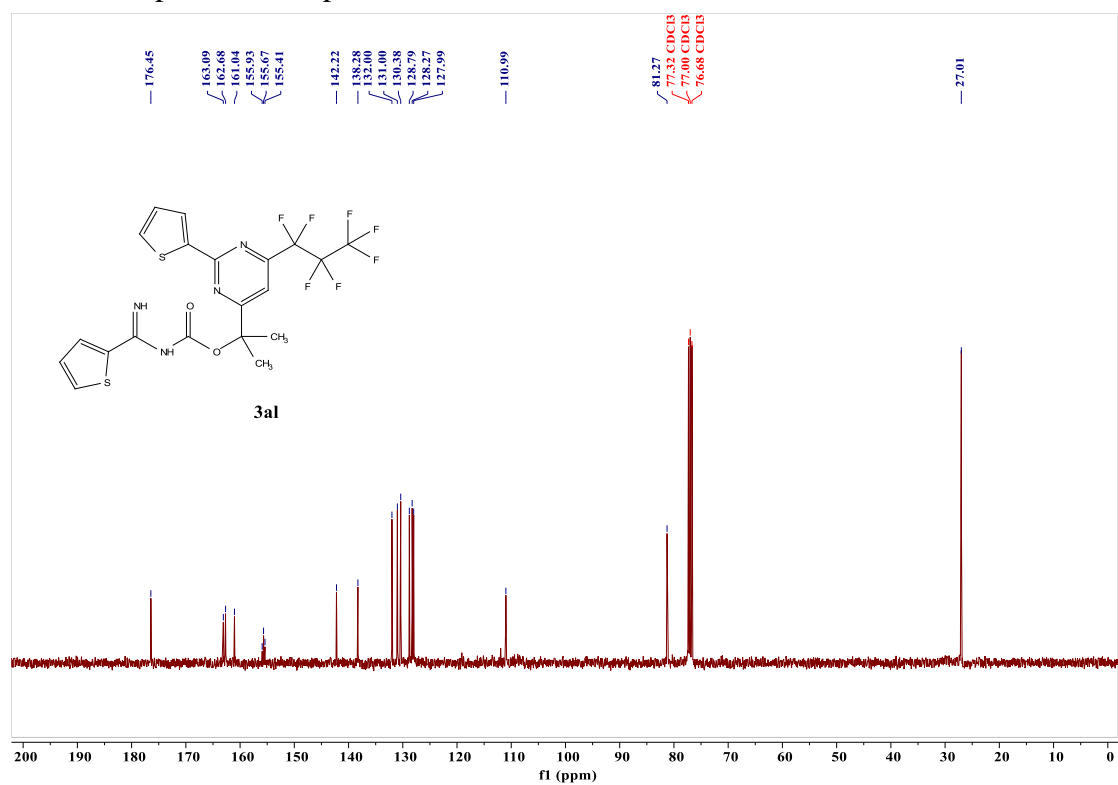

### <sup>1</sup>H NMR spectra of the product **3a1'**

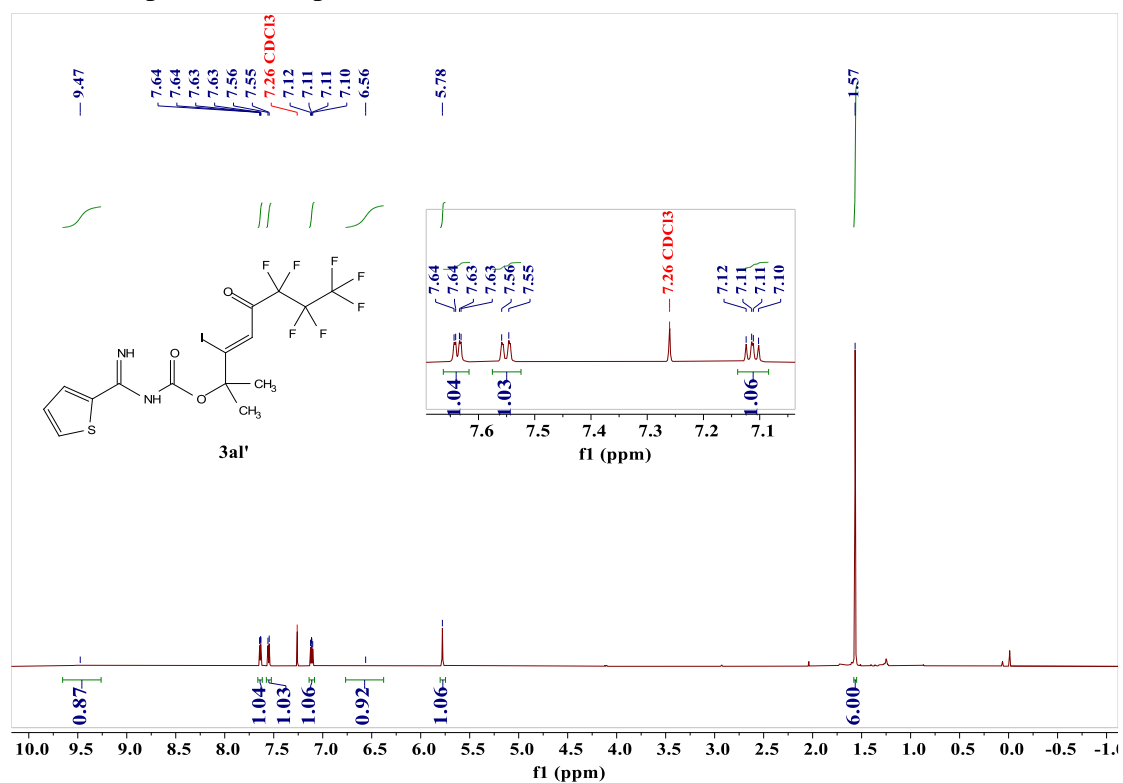

### <sup>19</sup>F NMR spectra of the product **3a1'**

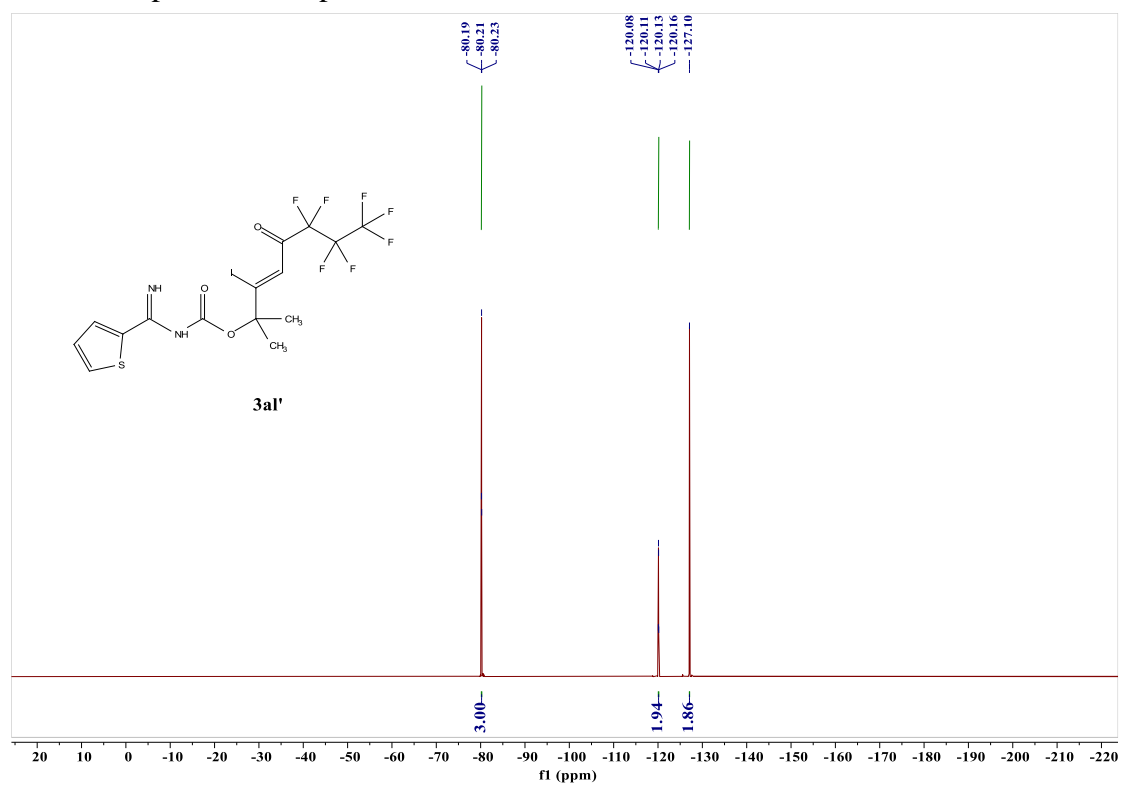

$^{13}\text{C}$  NMR spectra of the product **3al'**

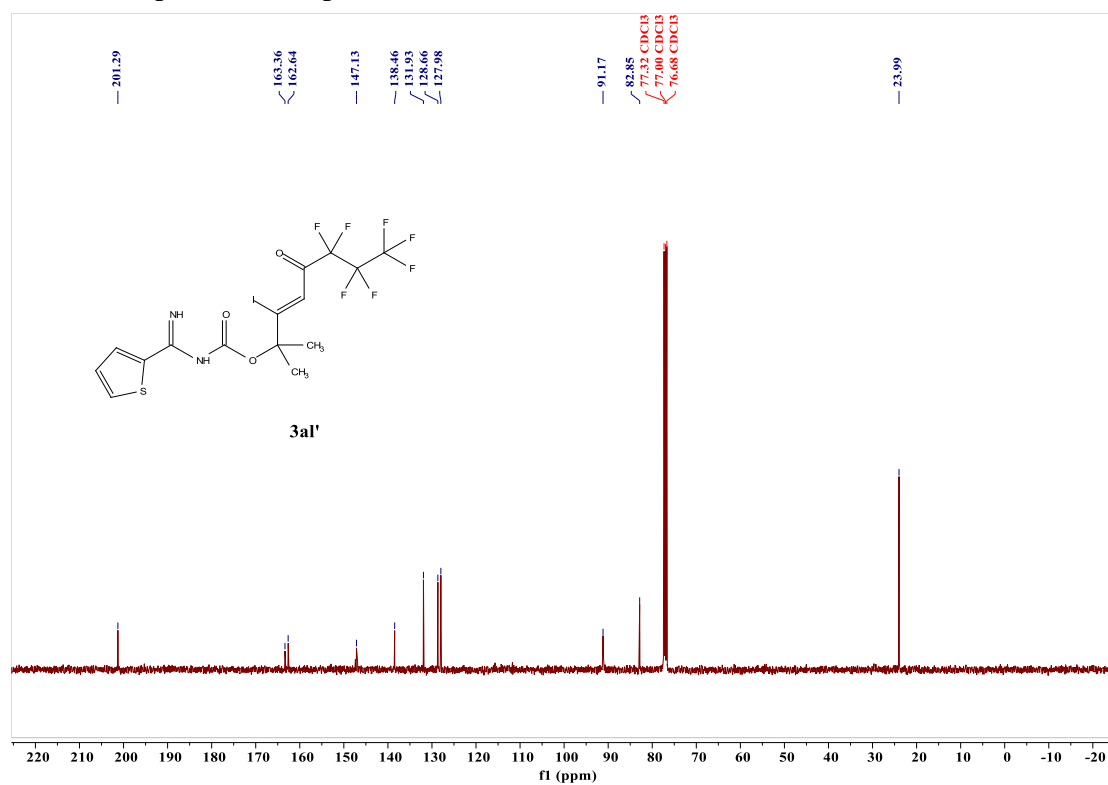

$^1\text{H}$  NMR spectra of the product **3am**

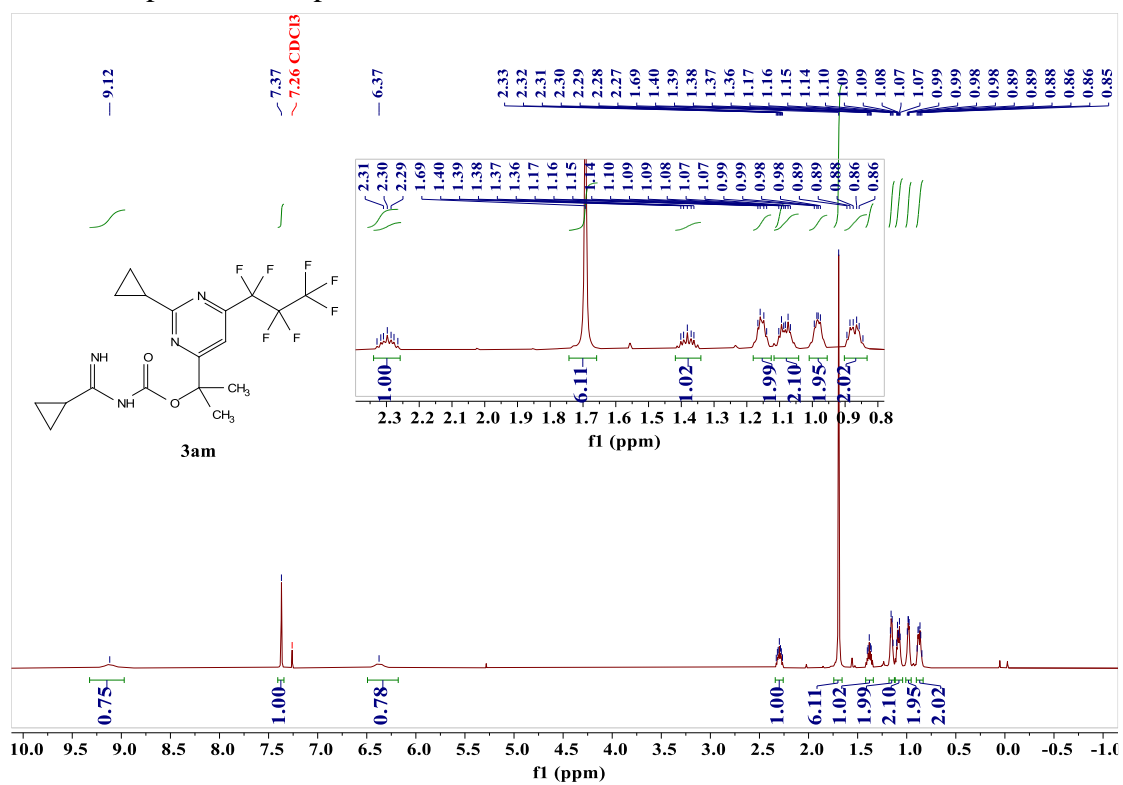



### <sup>19</sup>F NMR spectra of the product **3am**

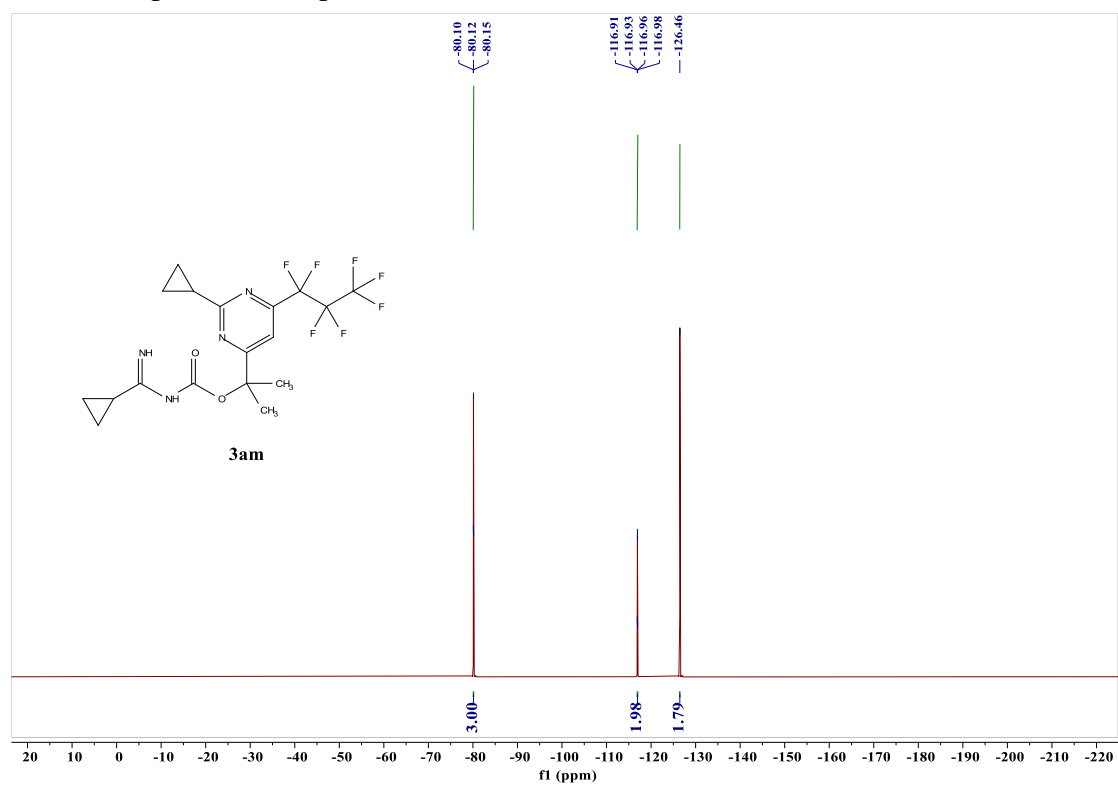

### <sup>13</sup>C NMR spectra of the product **3am**

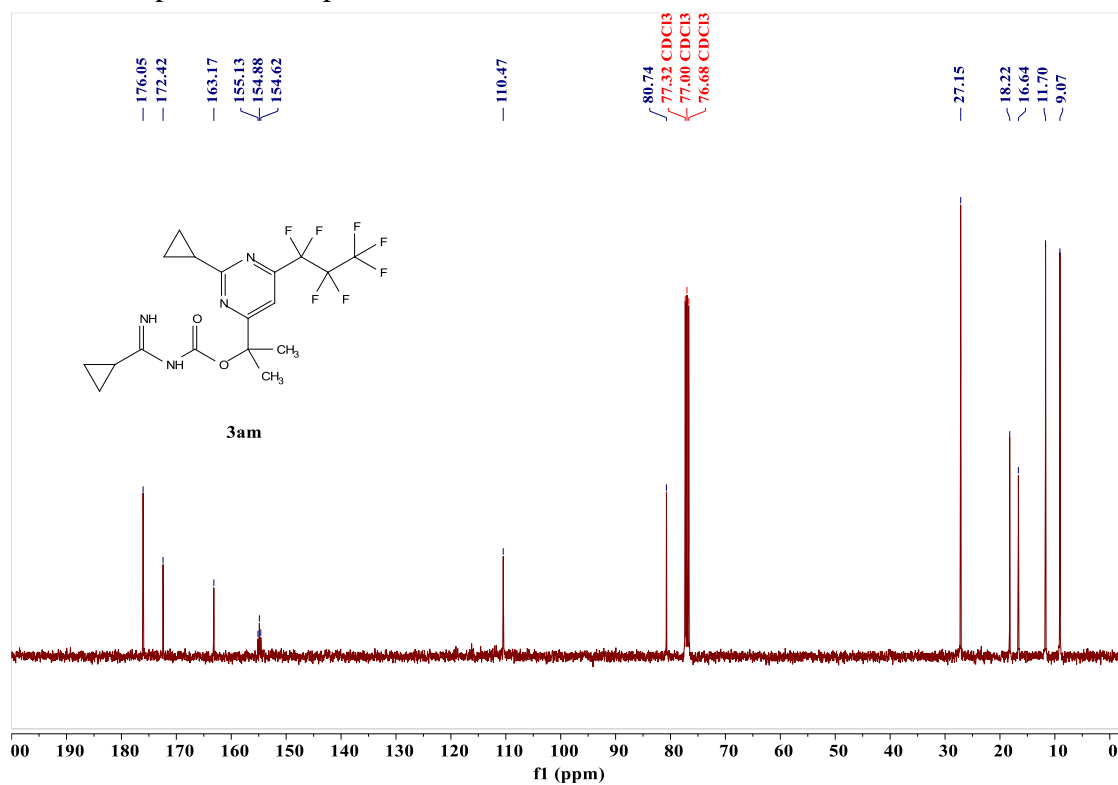

<sup>1</sup>H NMR spectra of the product **3ba**

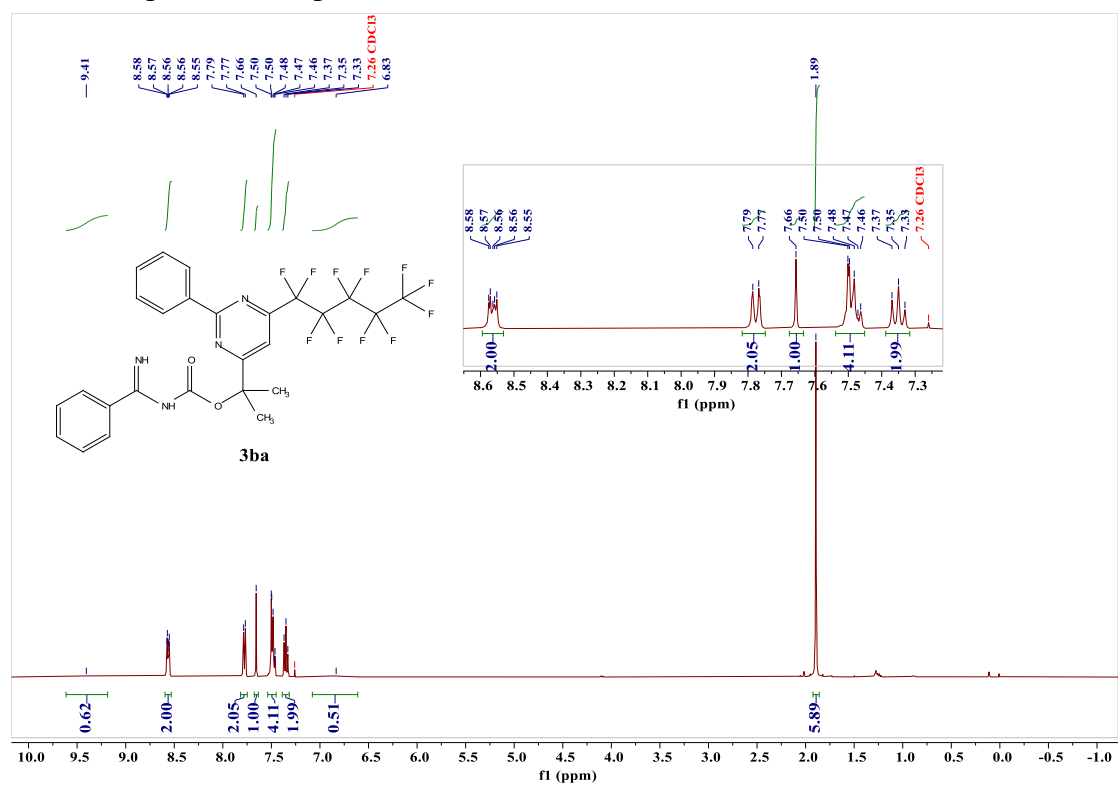

<sup>19</sup>F NMR spectra of the product **3ba**

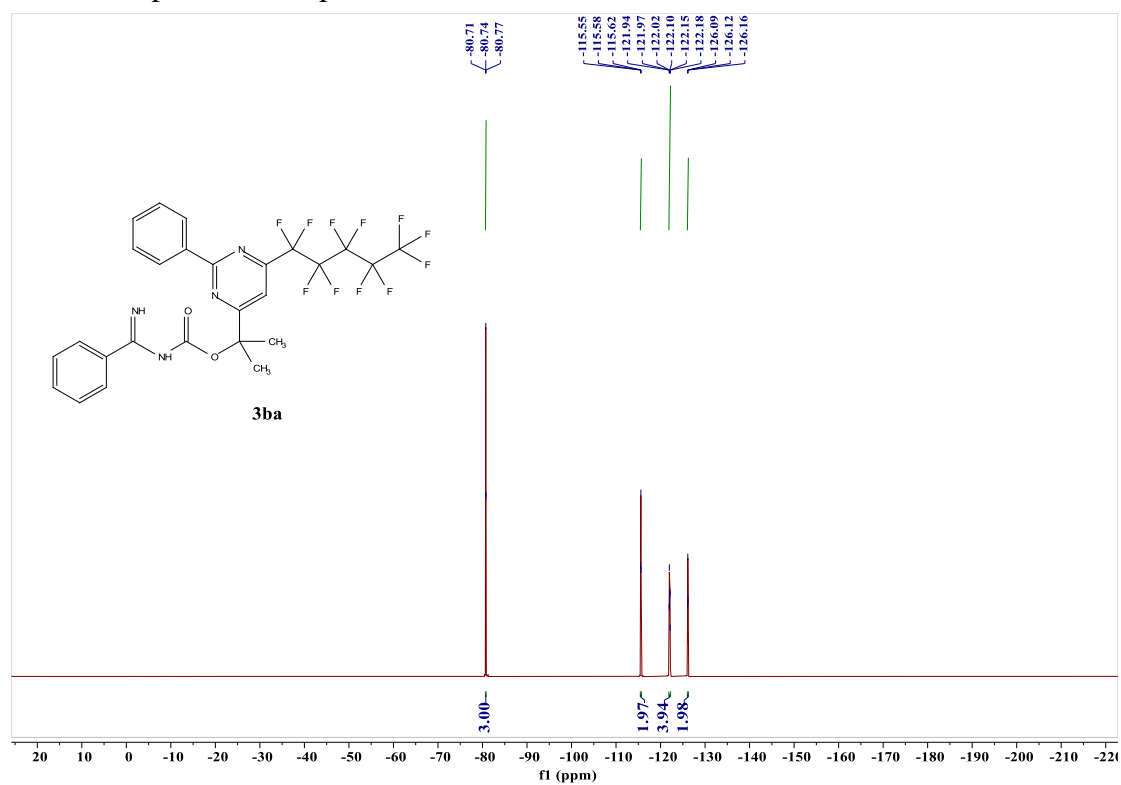

<sup>13</sup>C NMR spectra of the product **3ba**

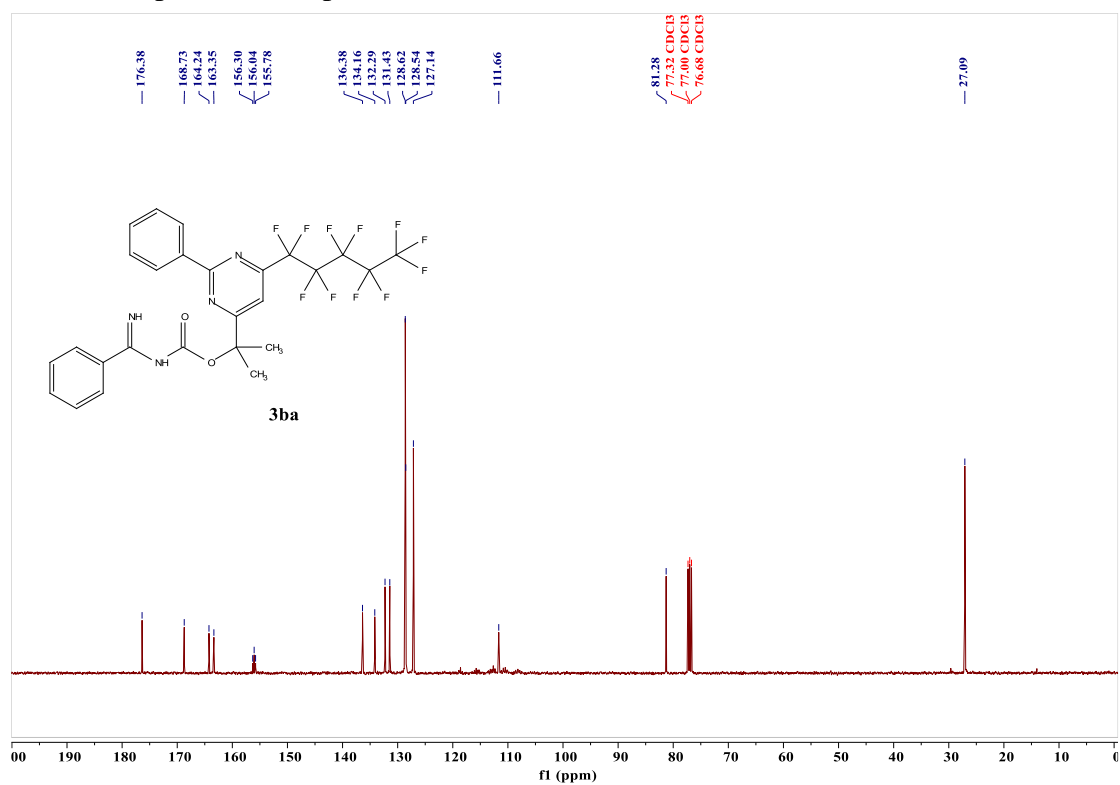

<sup>1</sup>H NMR spectra of the product **3ca**

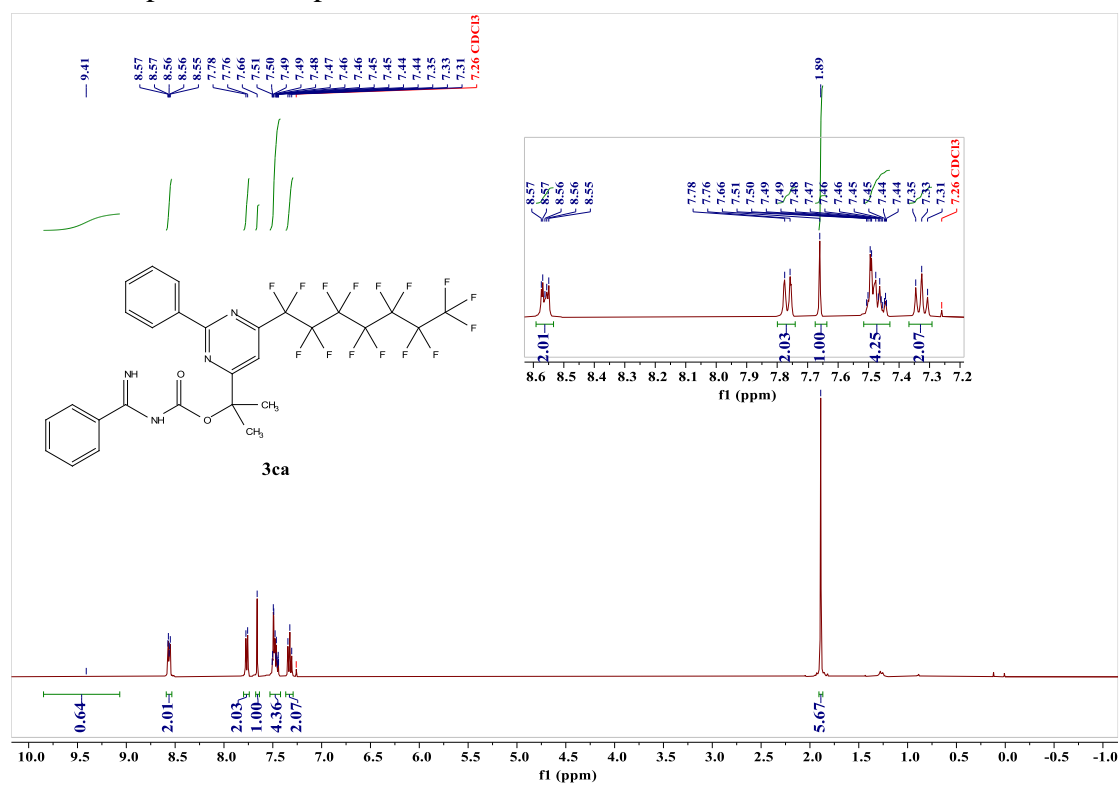

<sup>19</sup>F NMR spectra of the product **3ca**

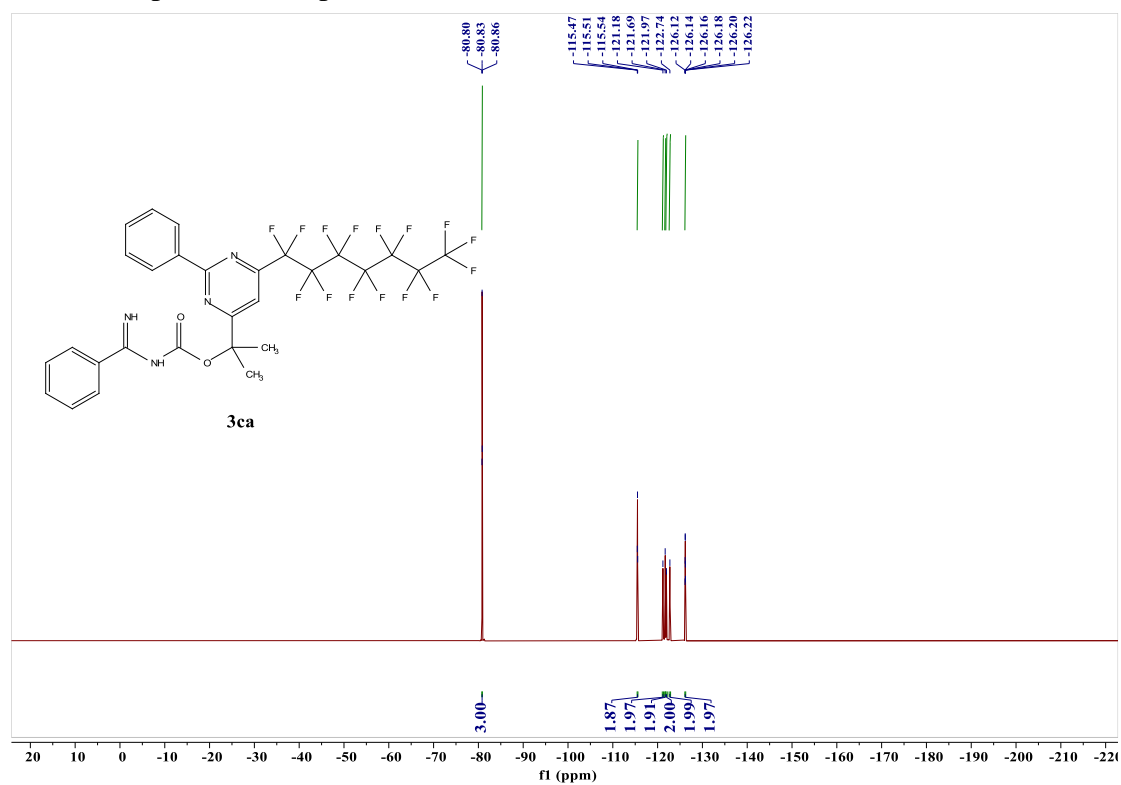

<sup>13</sup>C NMR spectra of the product **3ca**

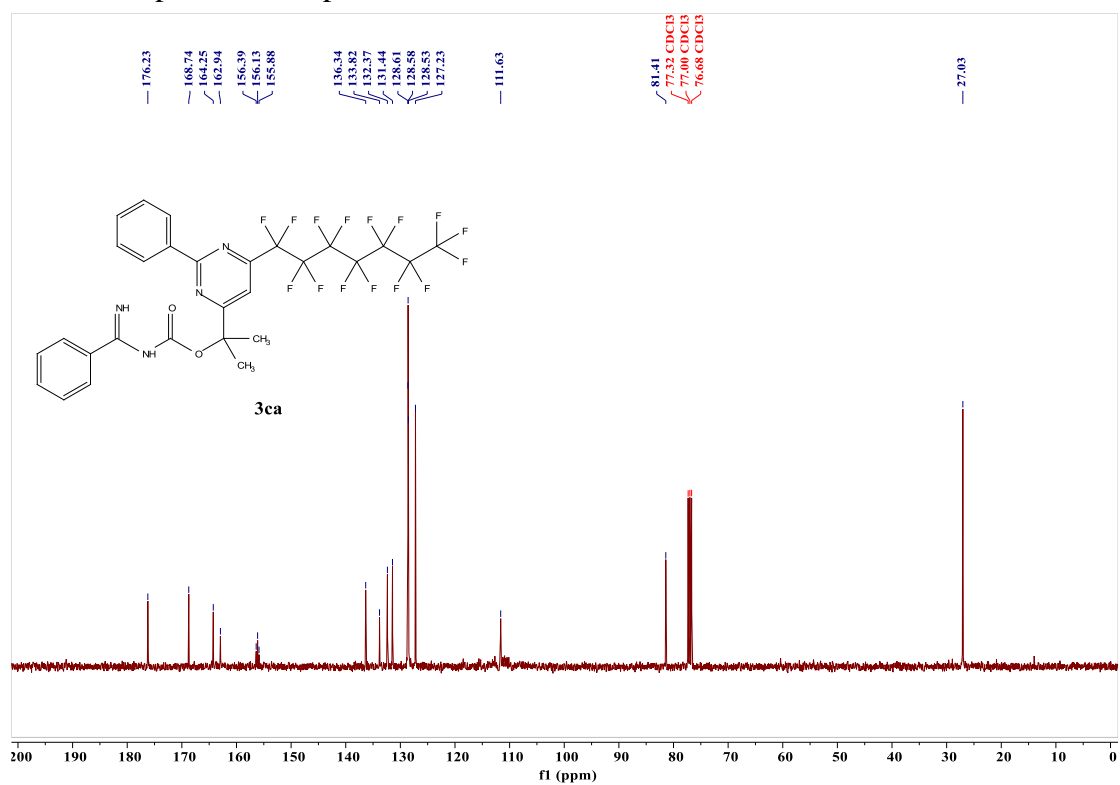

### <sup>1</sup>H NMR spectra of the product **3da**

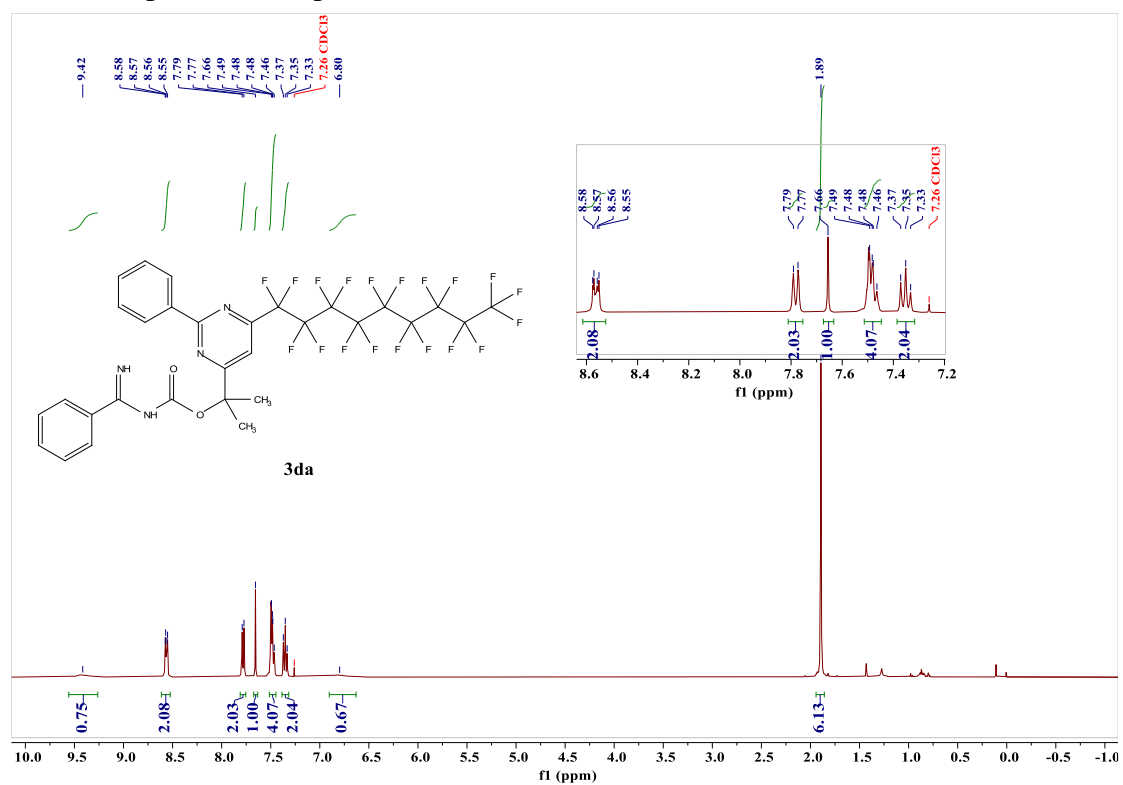

### <sup>19</sup>F NMR spectra of the product **3da**

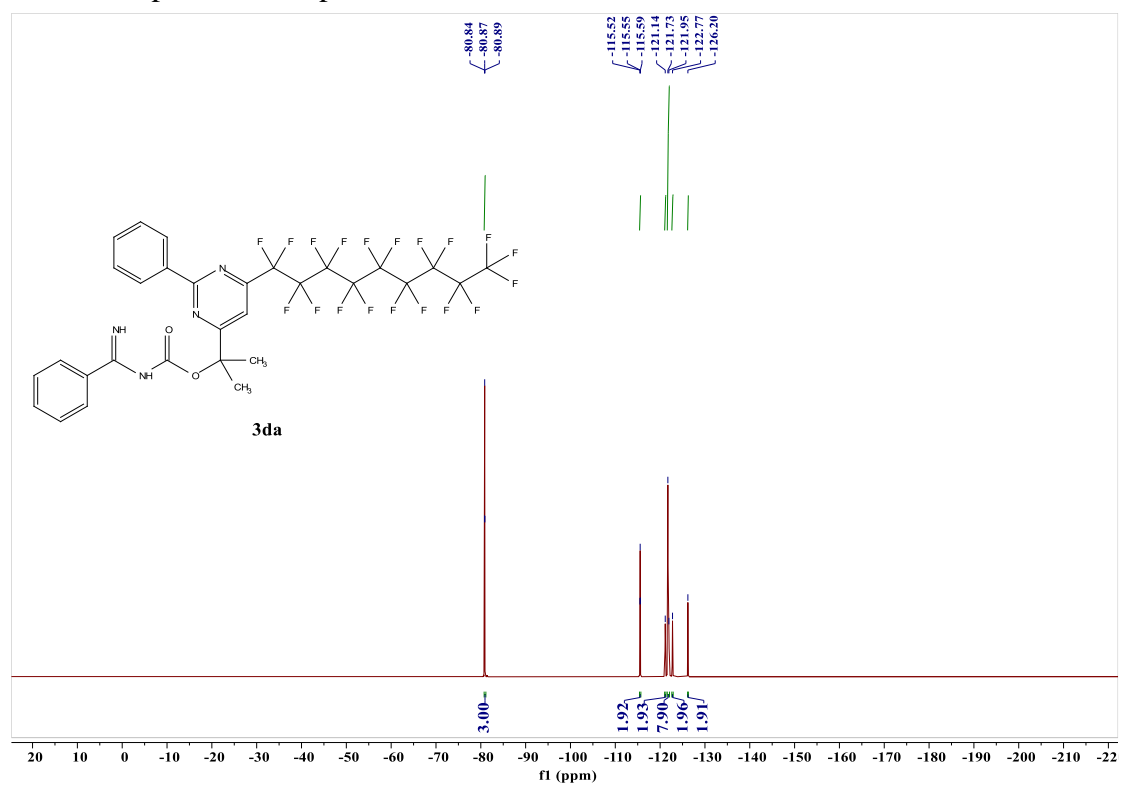

<sup>13</sup>C NMR spectra of the product **3da**

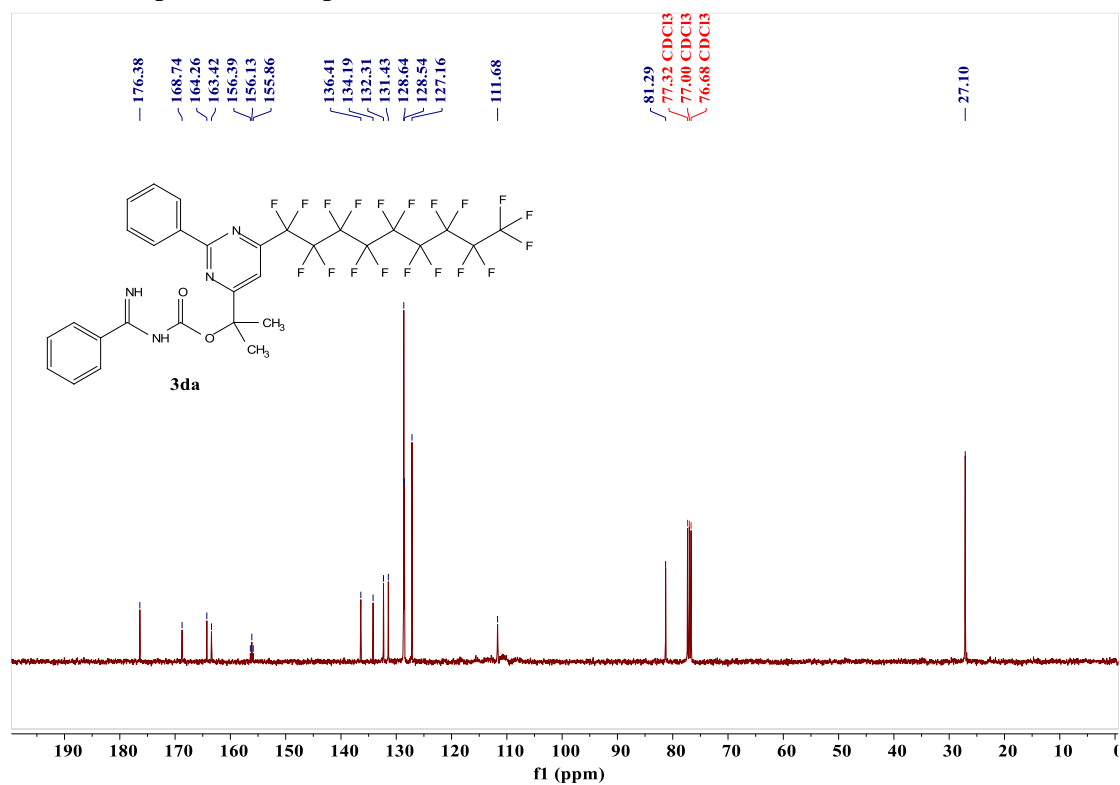

<sup>1</sup>H NMR spectra of the product **3fa**

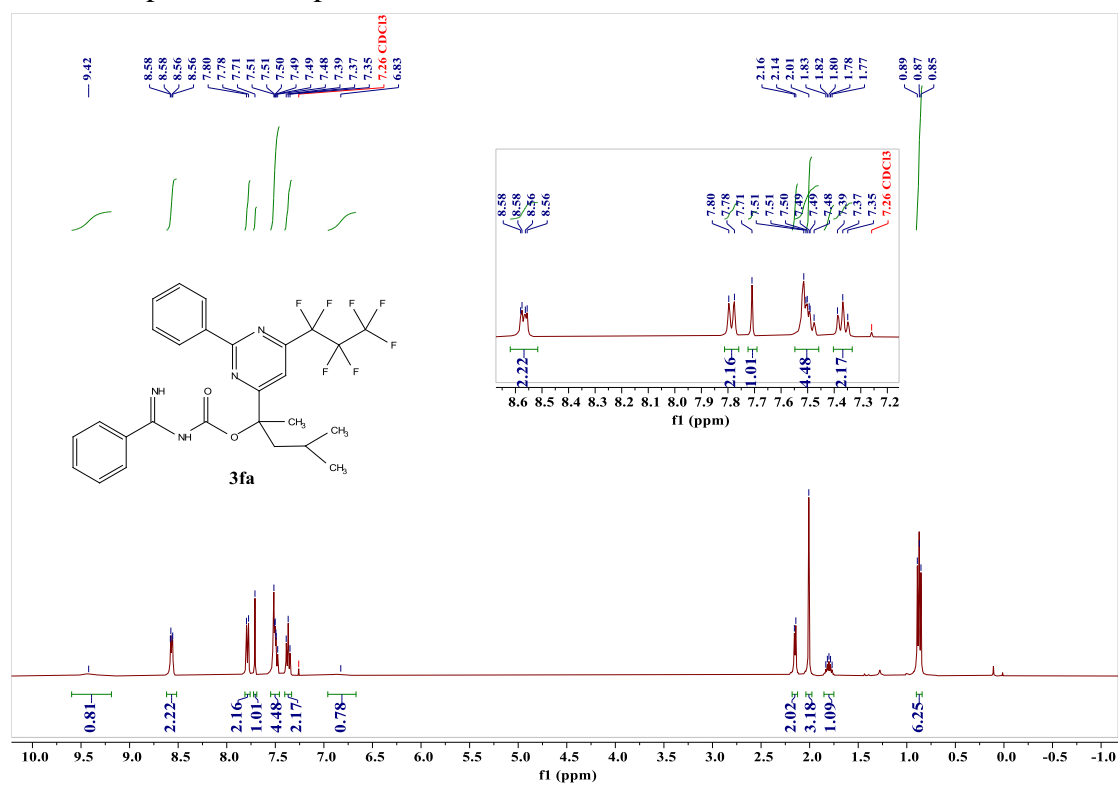

### <sup>19</sup>F NMR spectra of the product **3fa**

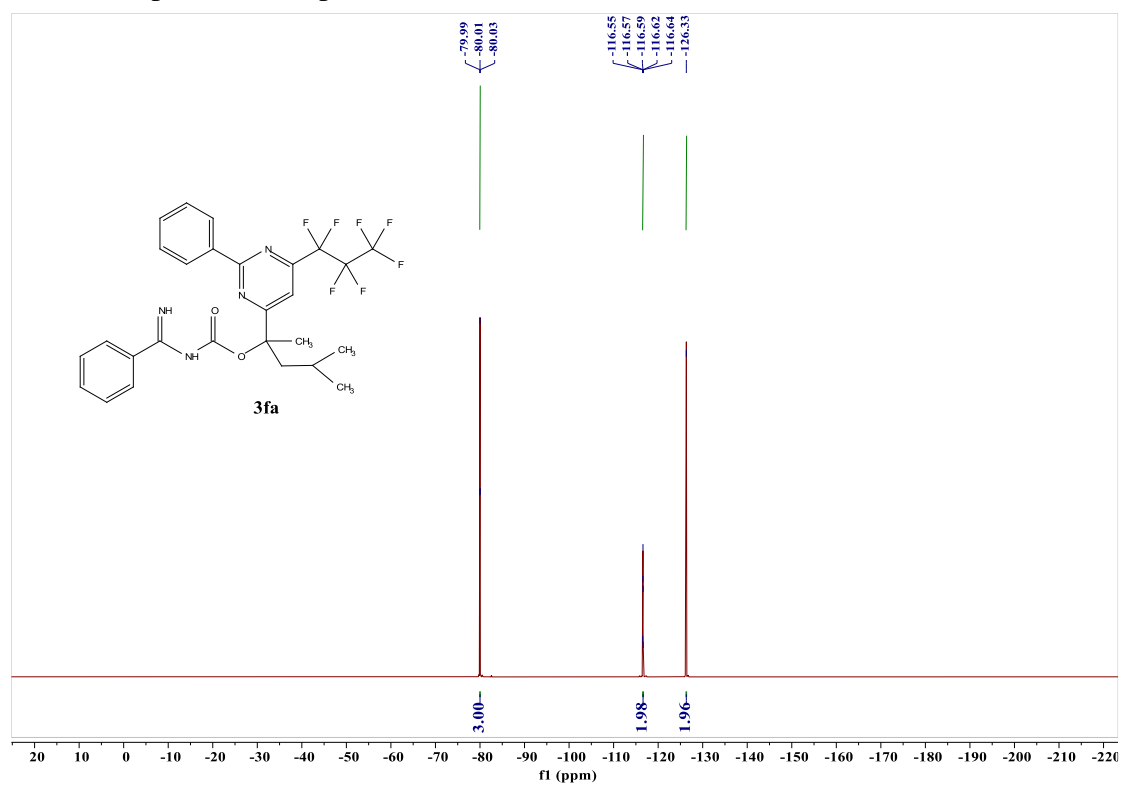

### <sup>13</sup>C NMR spectra of the product **3fa**

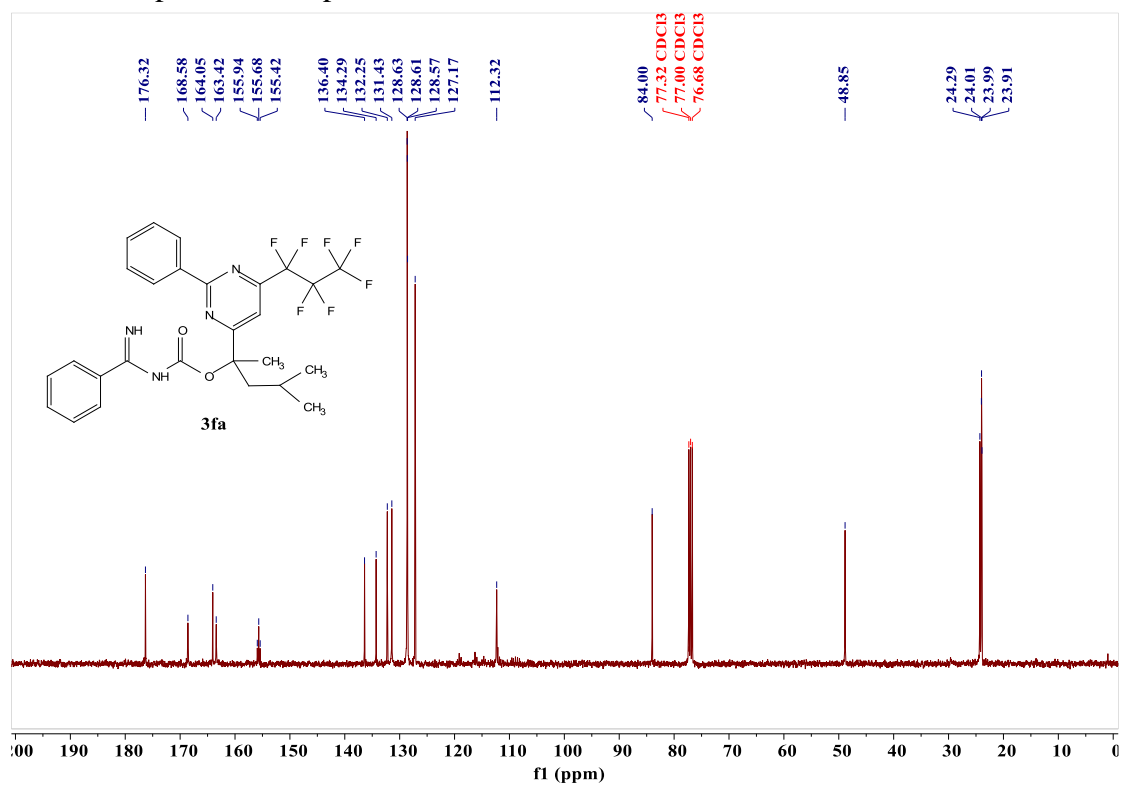

### $^1\text{H}$ NMR spectra of the product **3ga**

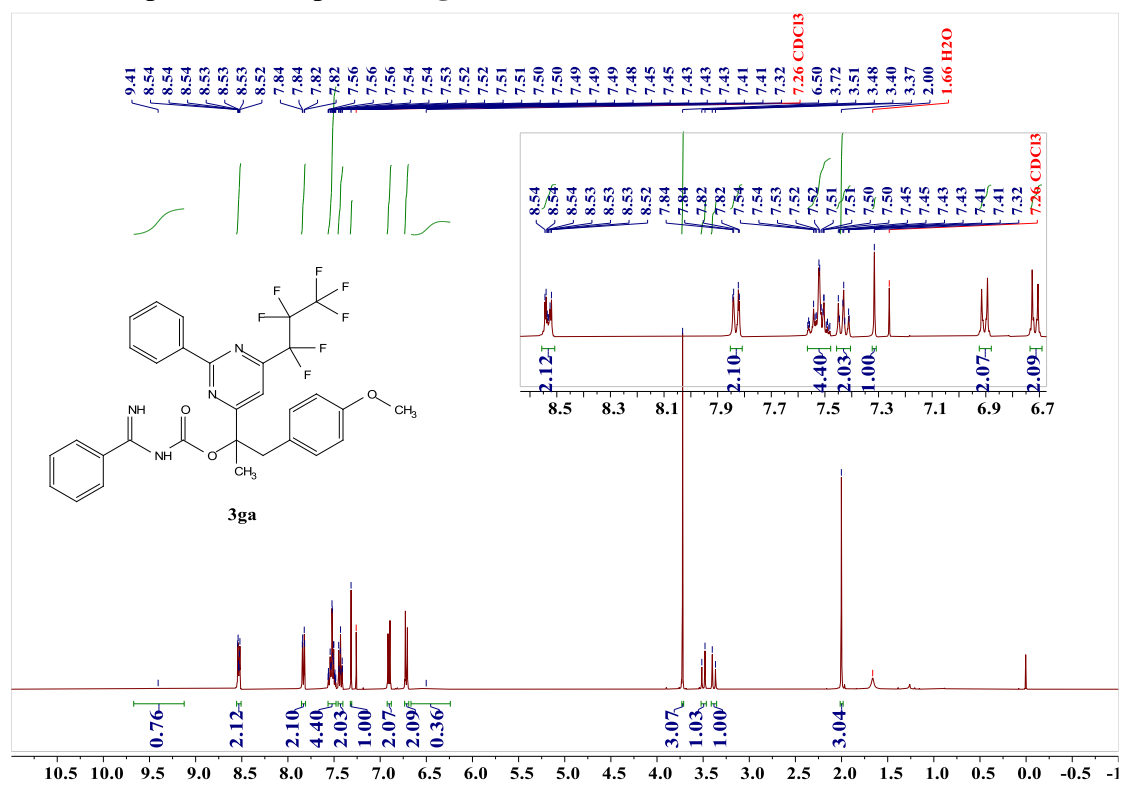

### $^{19}\text{F}$ NMR spectra of the product **3ga**

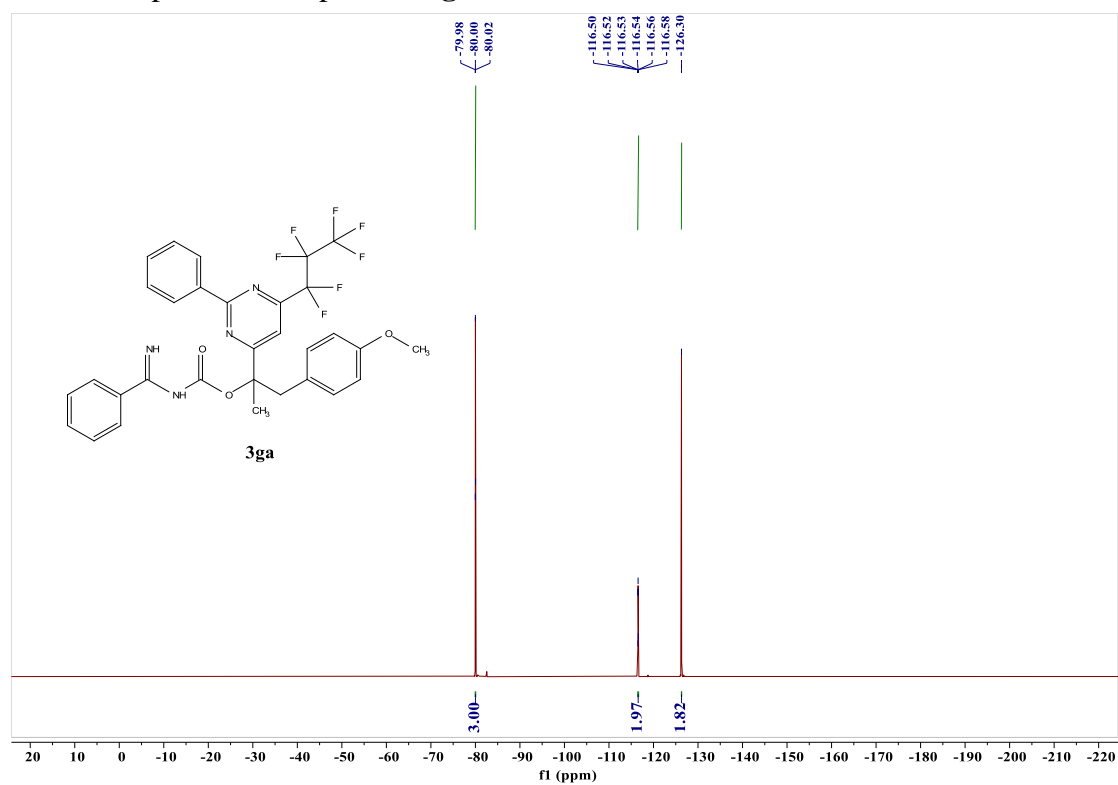



$^{13}\text{C}$  NMR spectra of the product **3ga**

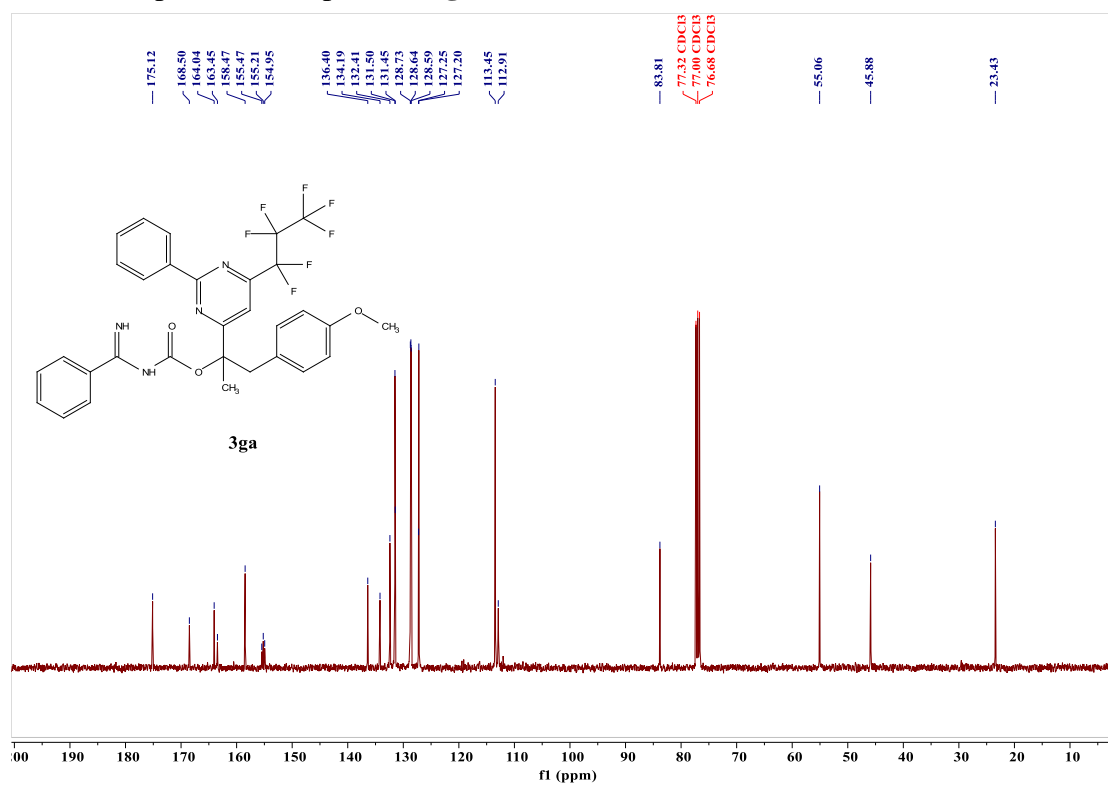

$^1\text{H}$  NMR spectra of the product **3ha**

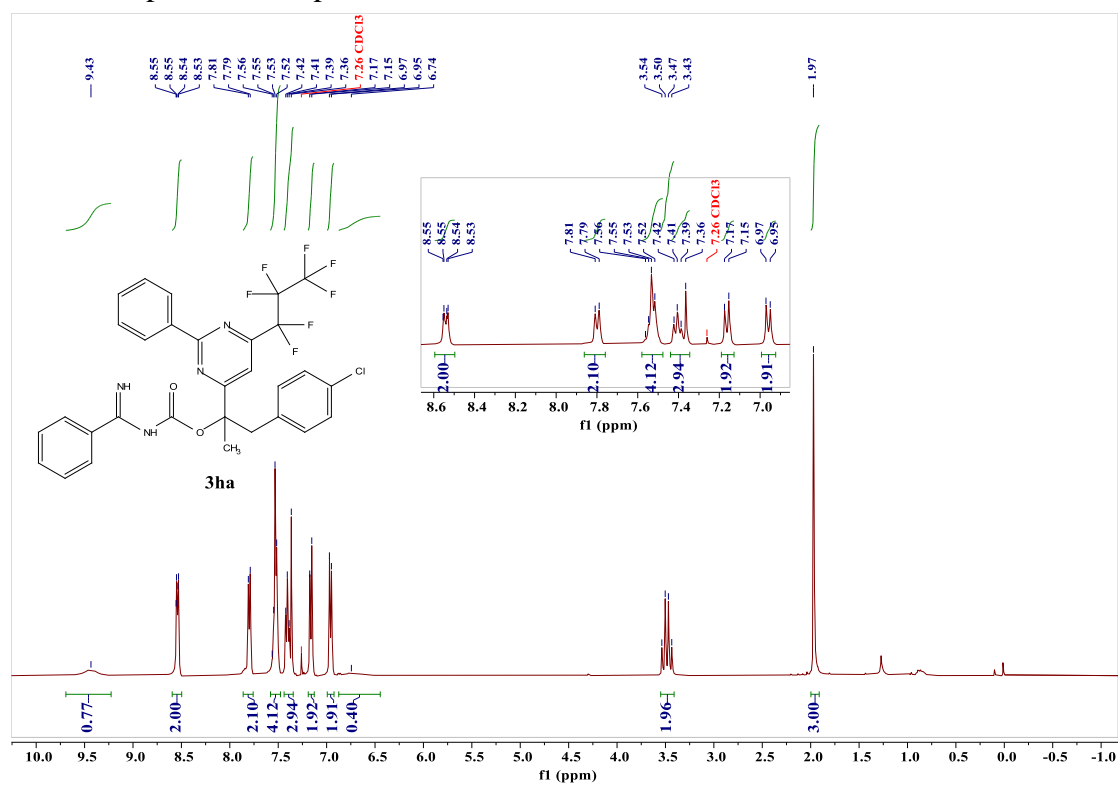

### <sup>19</sup>F NMR spectra of the product **3ha**

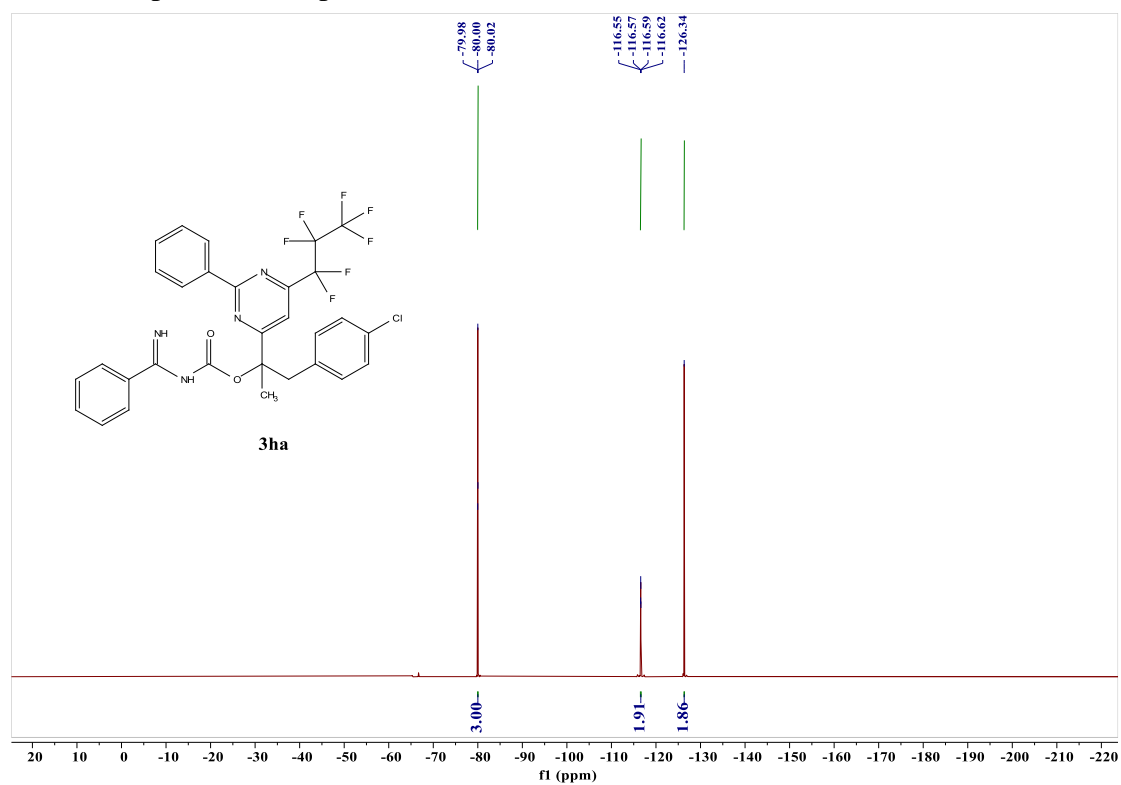

### <sup>13</sup>C NMR spectra of the product **3ha**

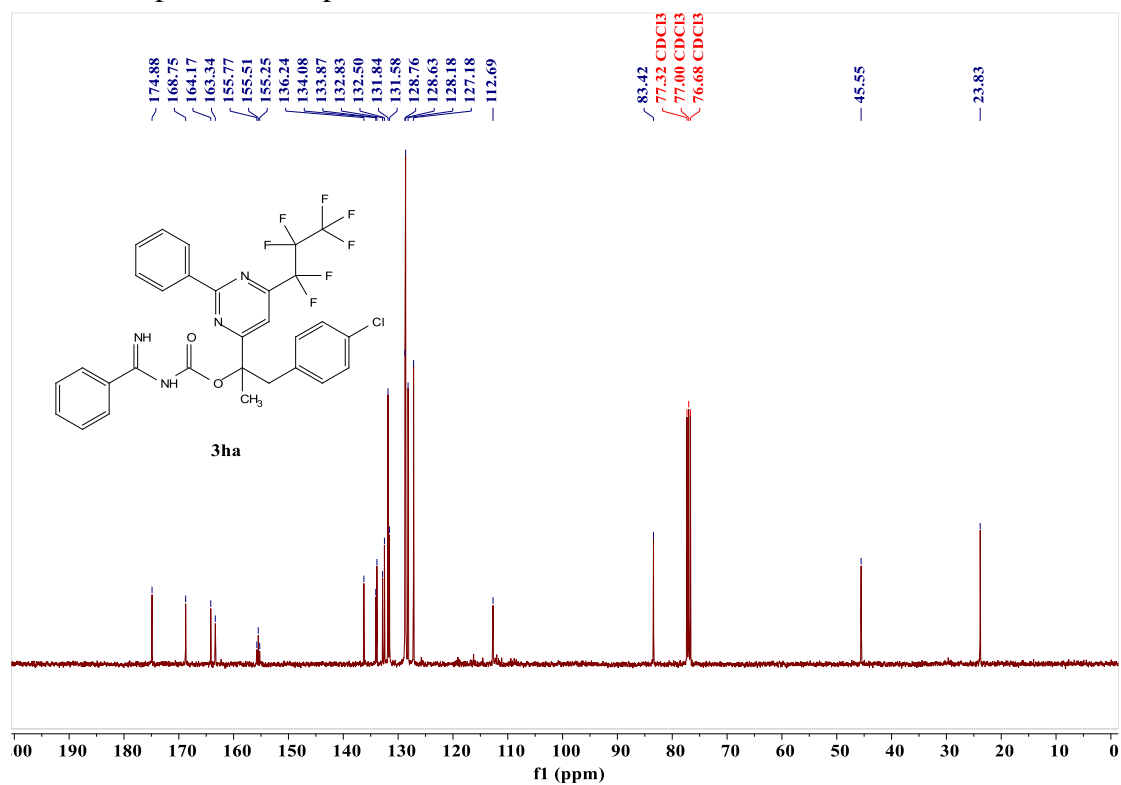





### <sup>19</sup>F NMR spectra of the product **3ja**

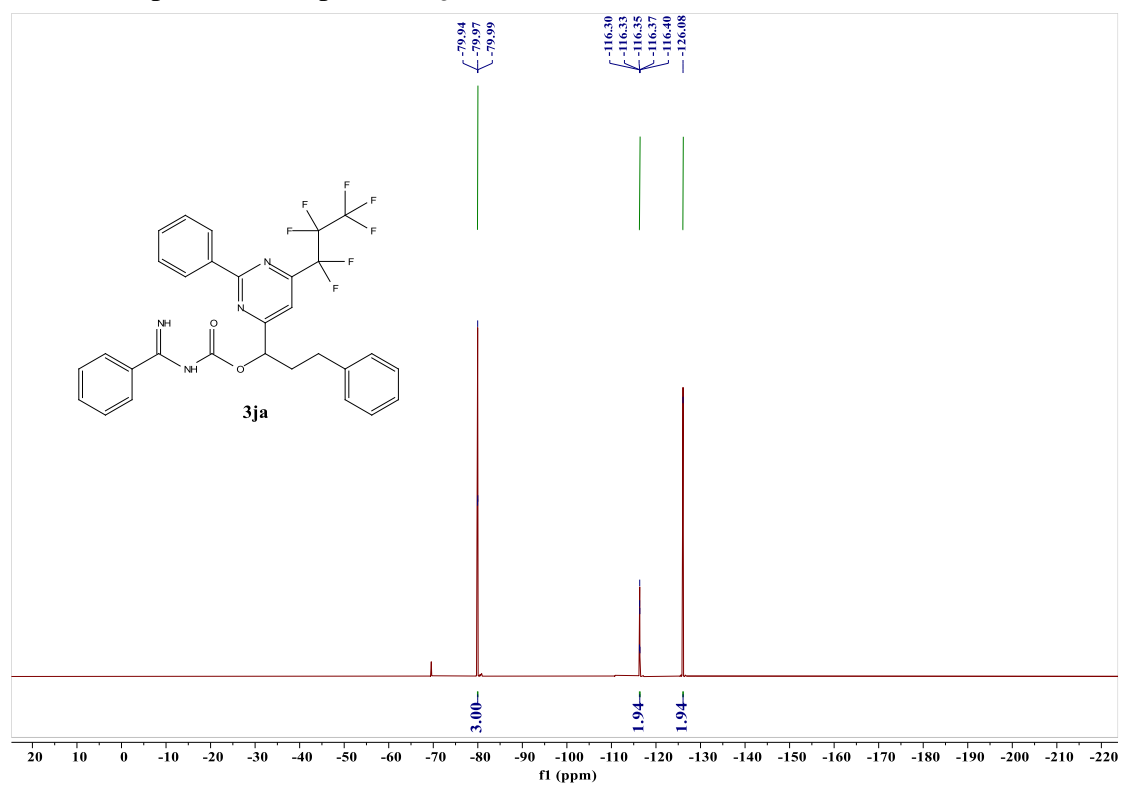

### <sup>13</sup>C NMR spectra of the product **3ja**

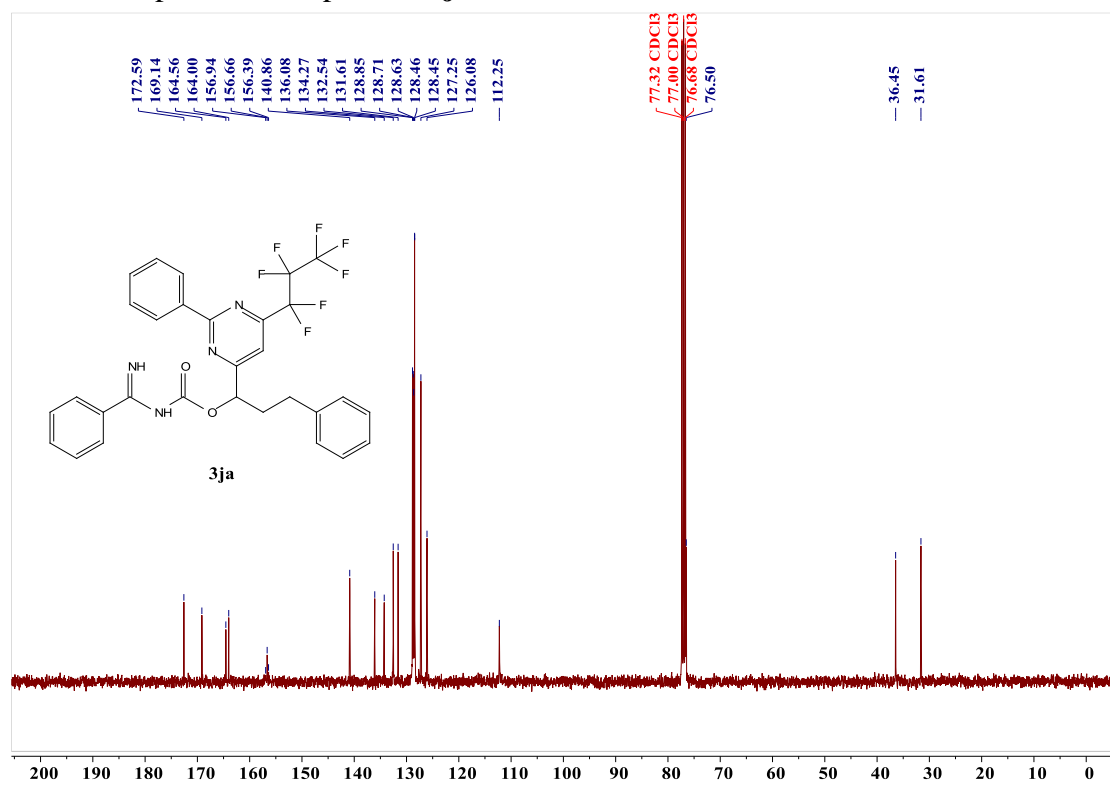

### <sup>1</sup>H NMR spectra of the product **3ka**

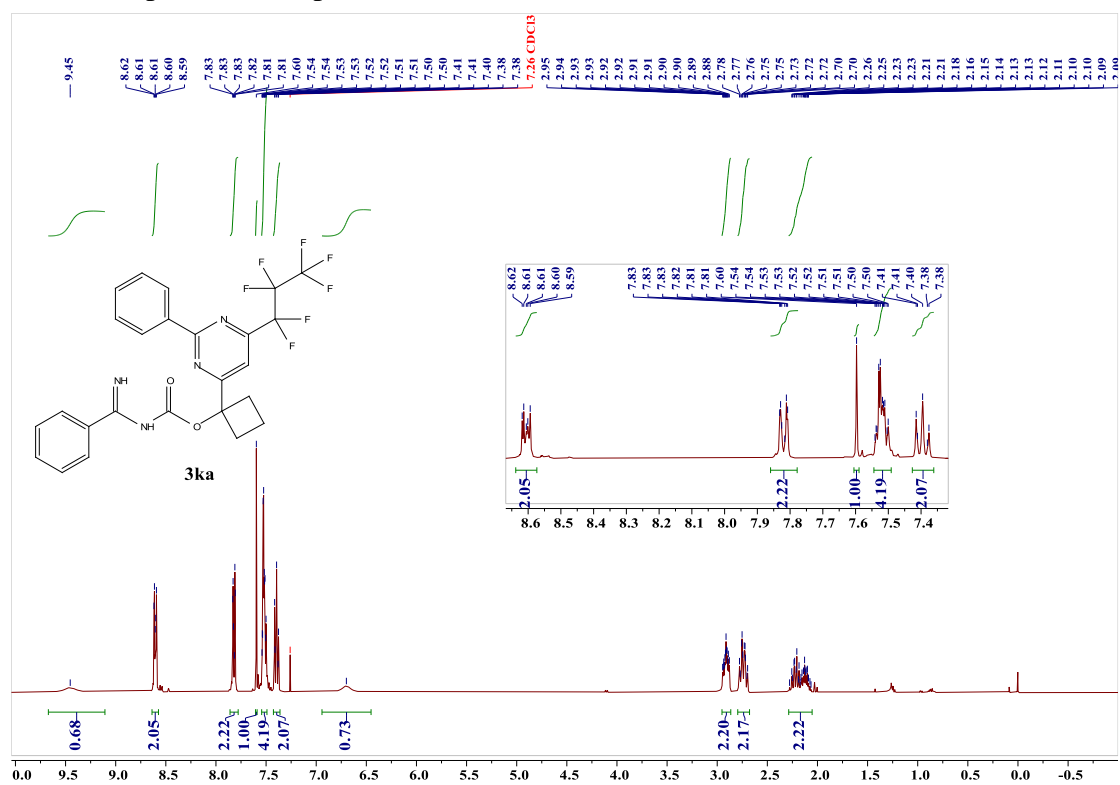

### <sup>19</sup>F NMR spectra of the product **3ka**

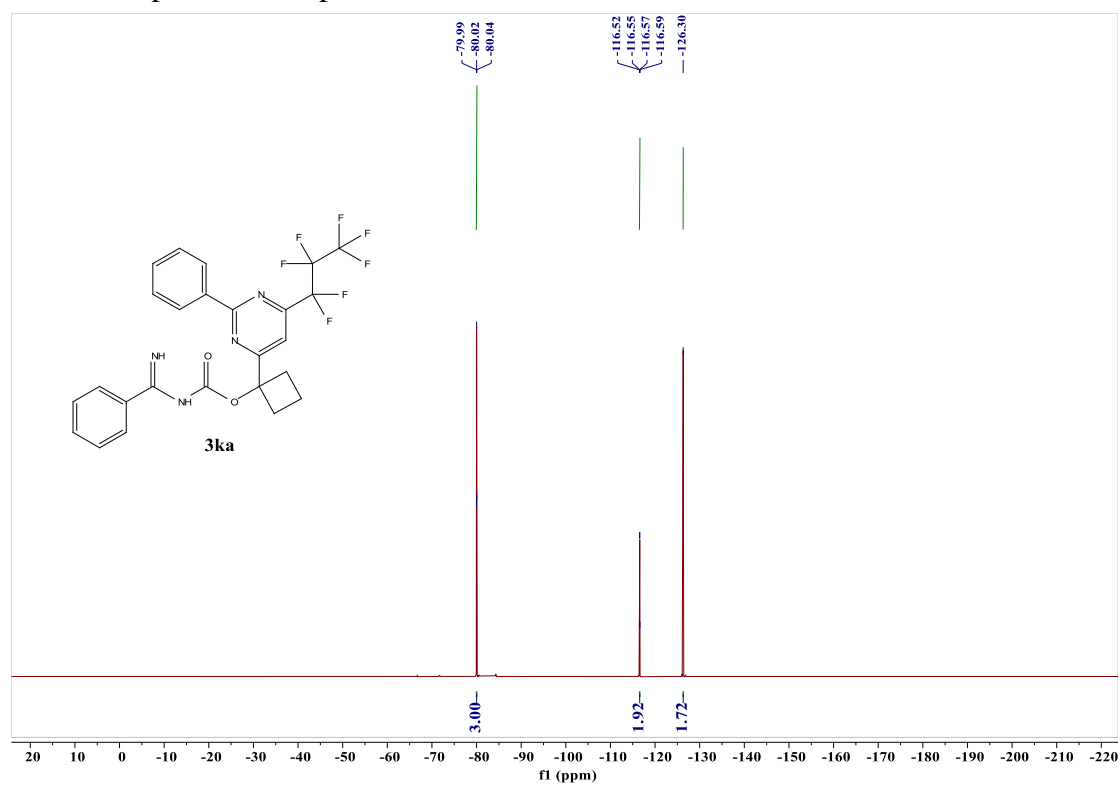

### $^{13}\text{C}$ NMR spectra of the product **3ka**

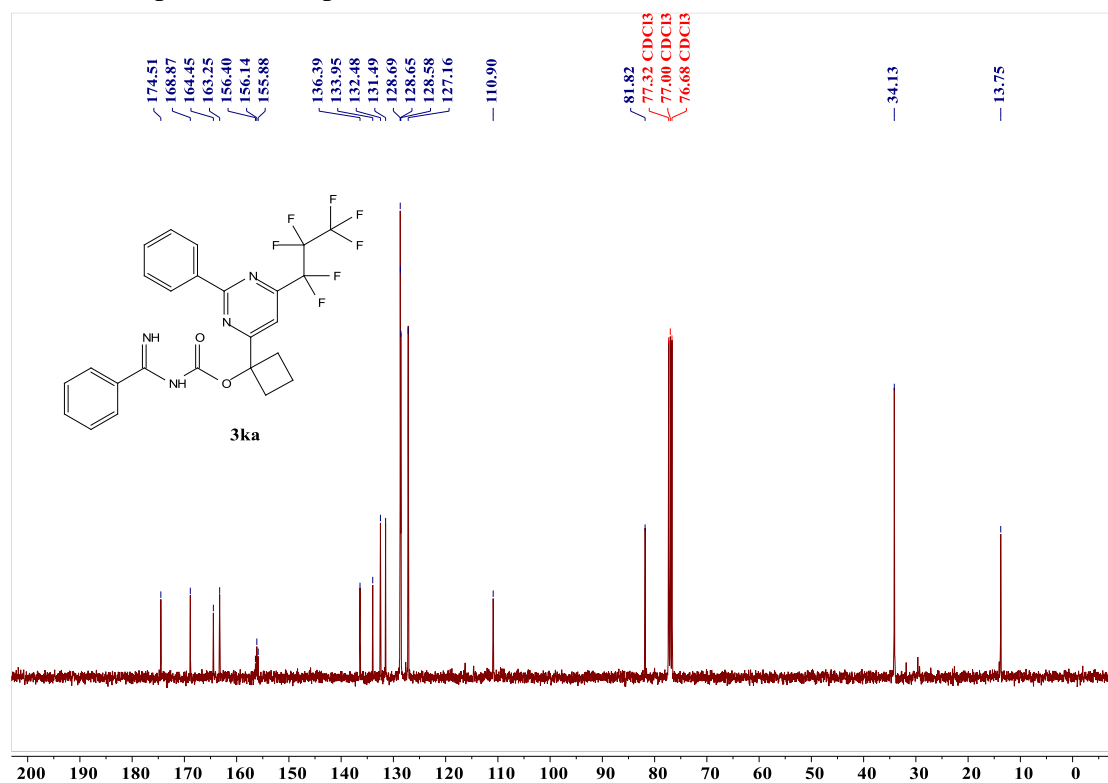

### $^1\text{H}$ NMR spectra of the product **3la**

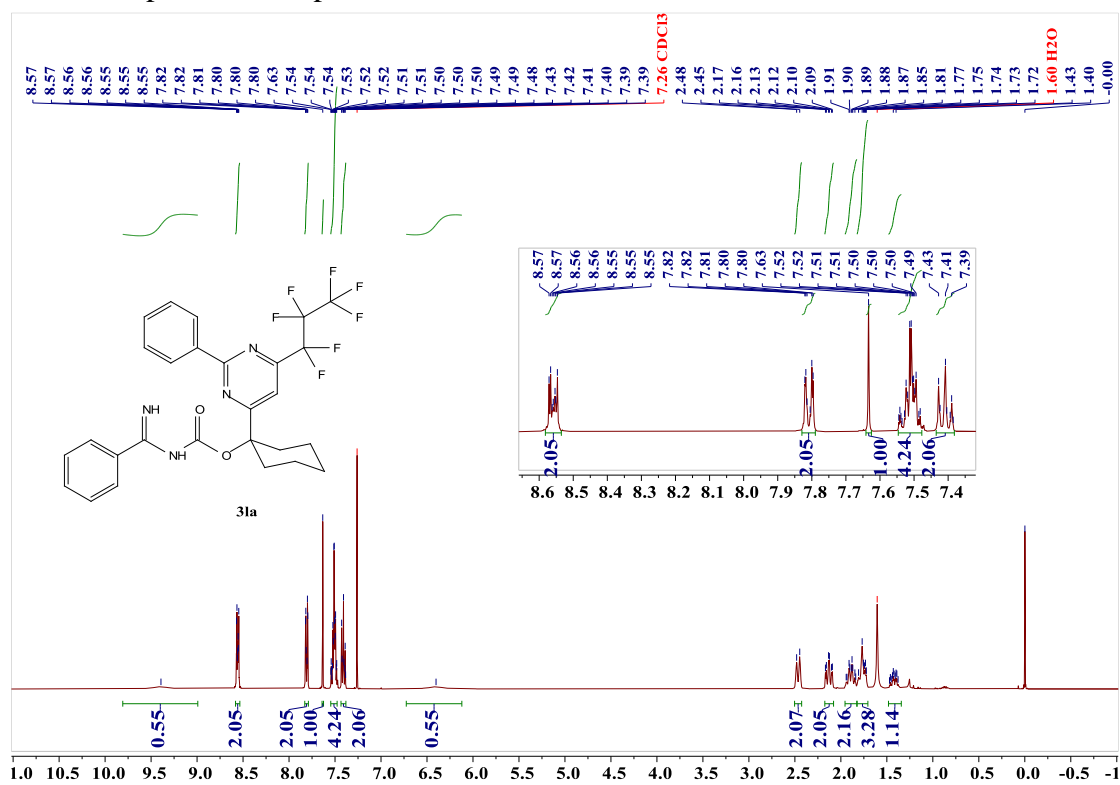

### <sup>19</sup>F NMR spectra of the product **3la**

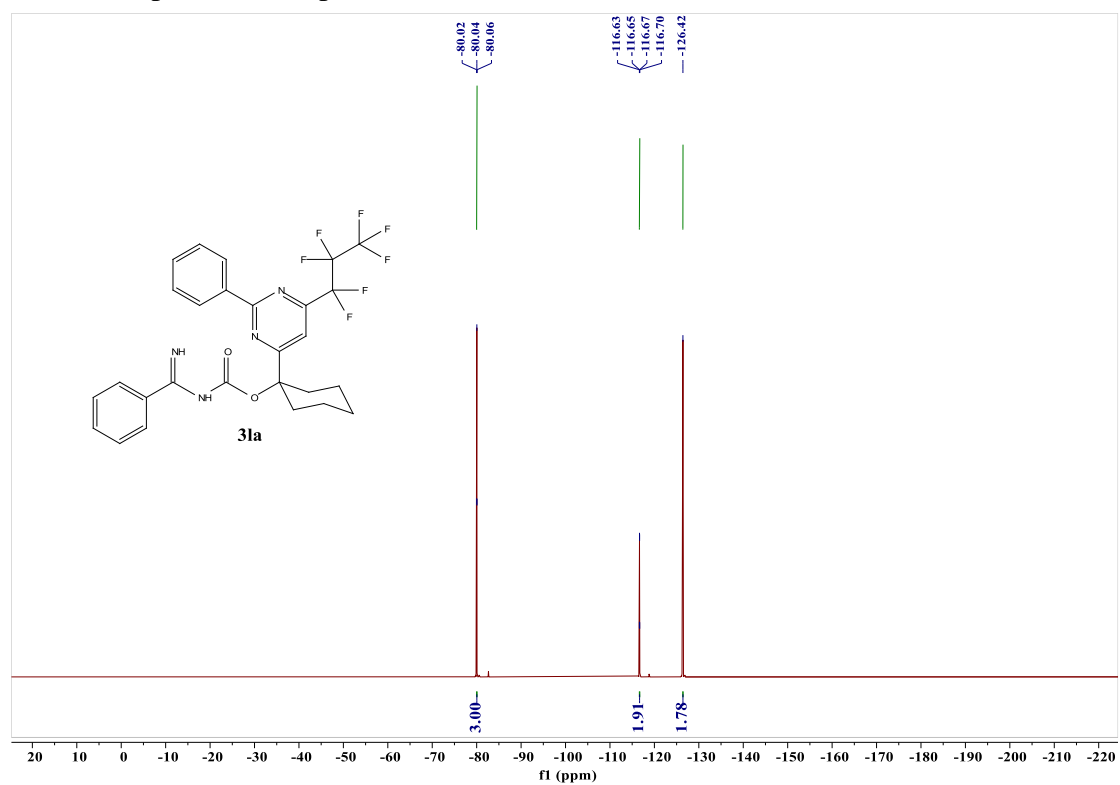

### <sup>13</sup>C NMR spectra of the product **3la**

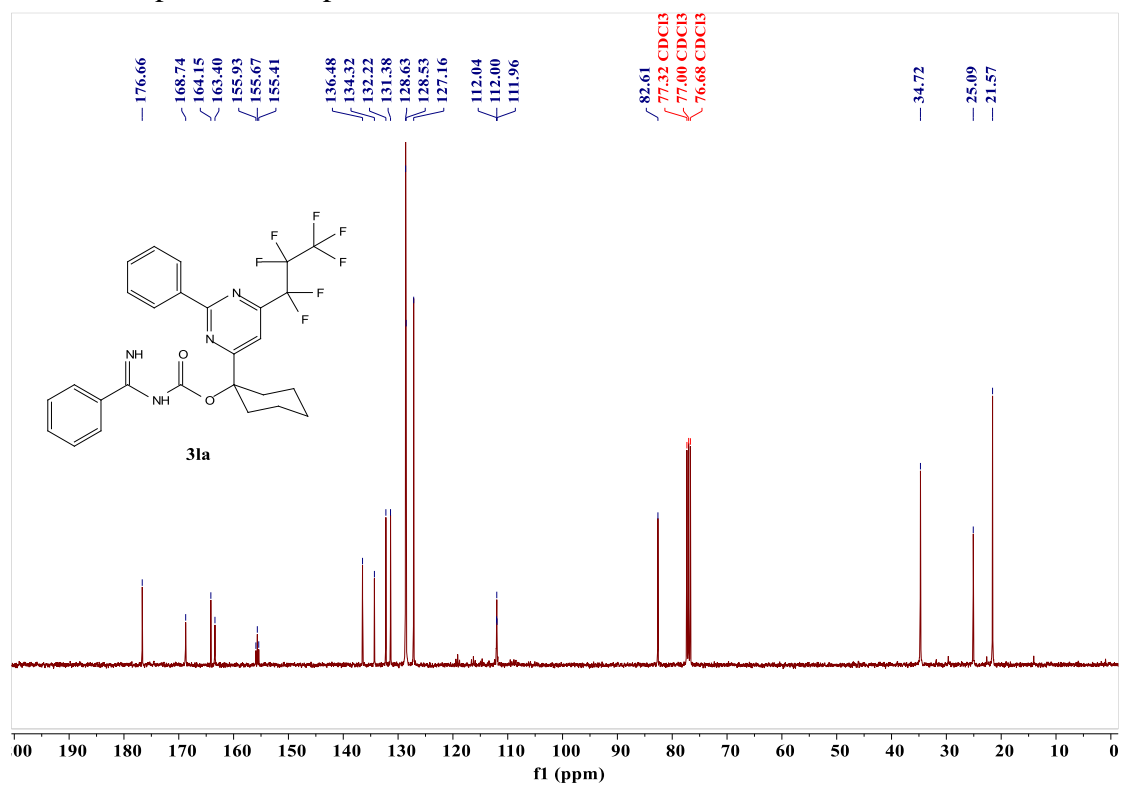



### $^1\text{H}$ NMR spectra of the product **3ma**

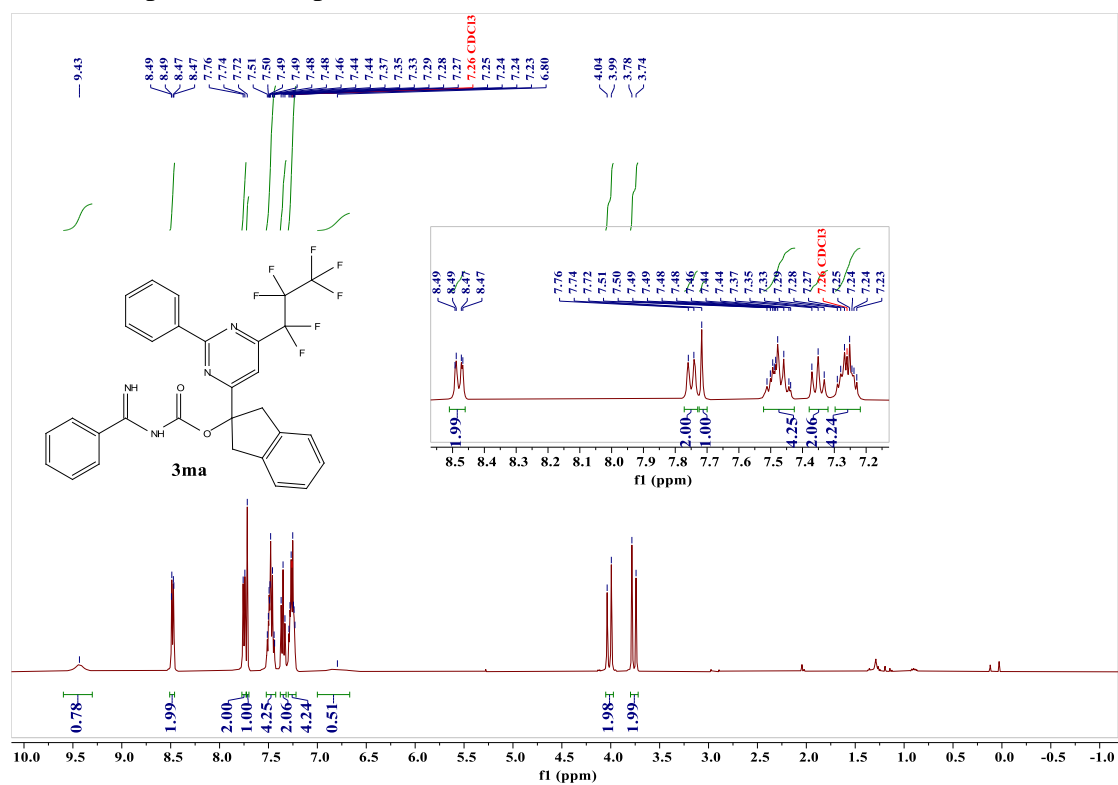

### $^{19}\text{F}$ NMR spectra of the product **3ma**

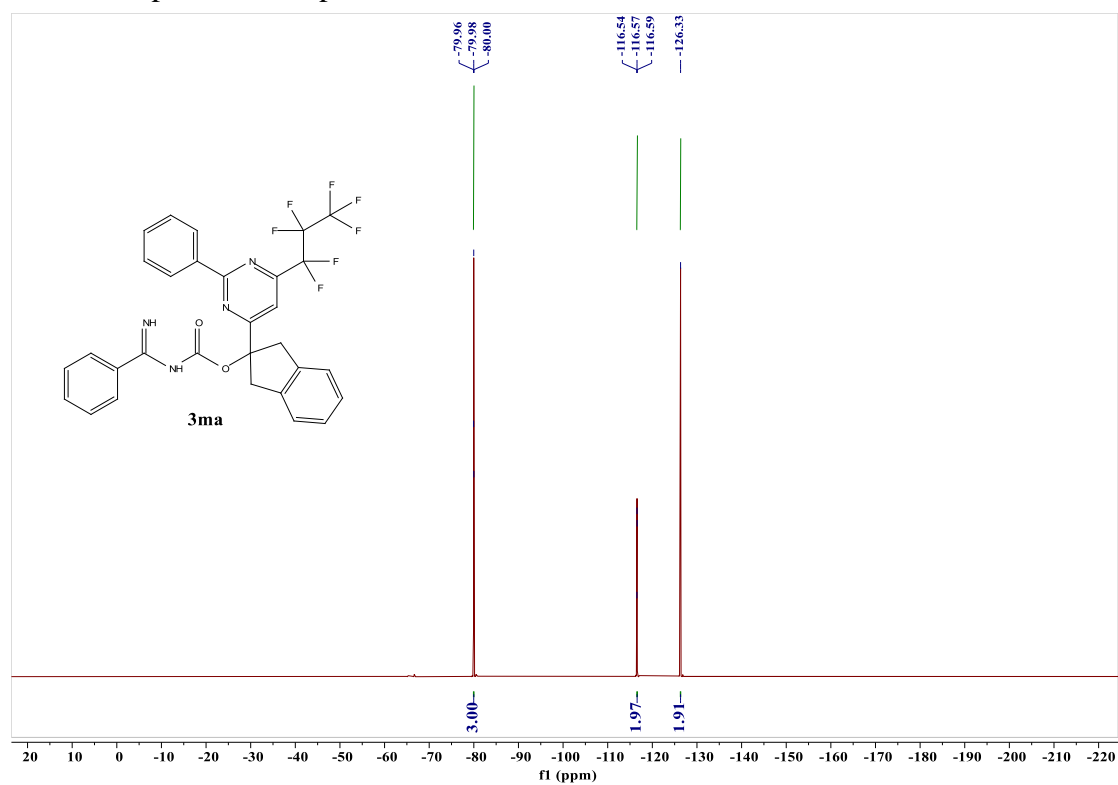

$^{13}\text{C}$  NMR spectra of the product **3ma**

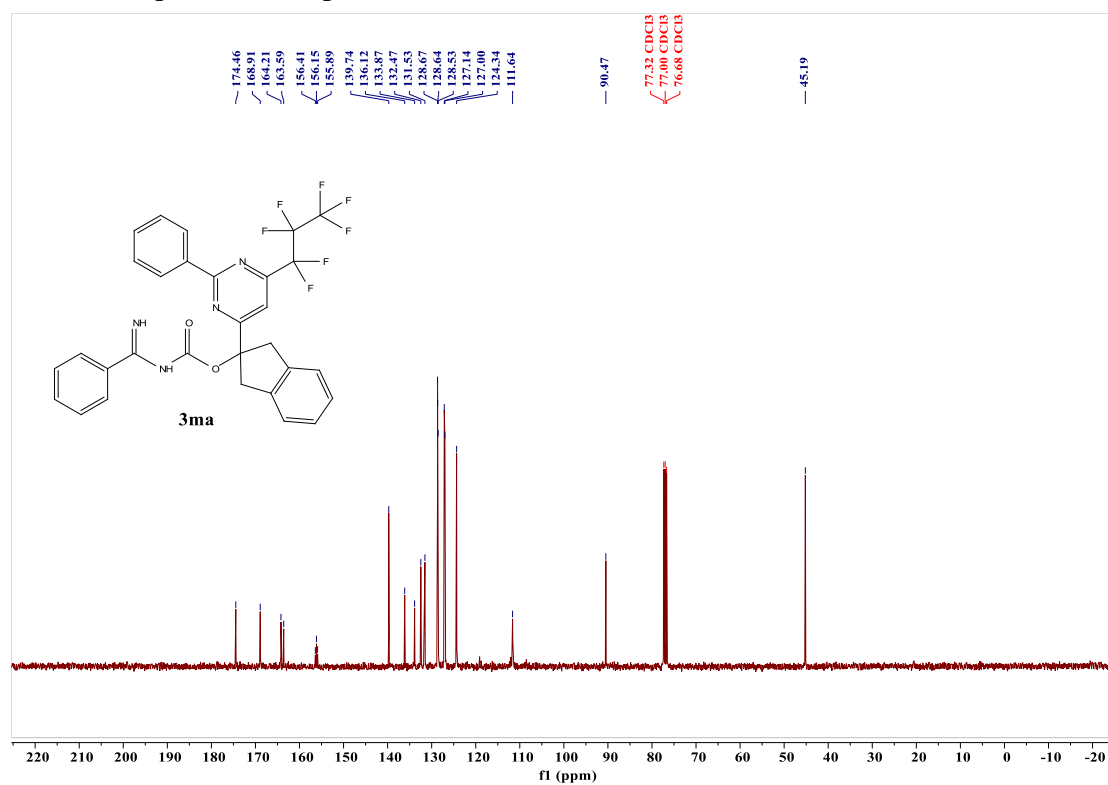

$^1\text{H}$  NMR spectra of the product **4**

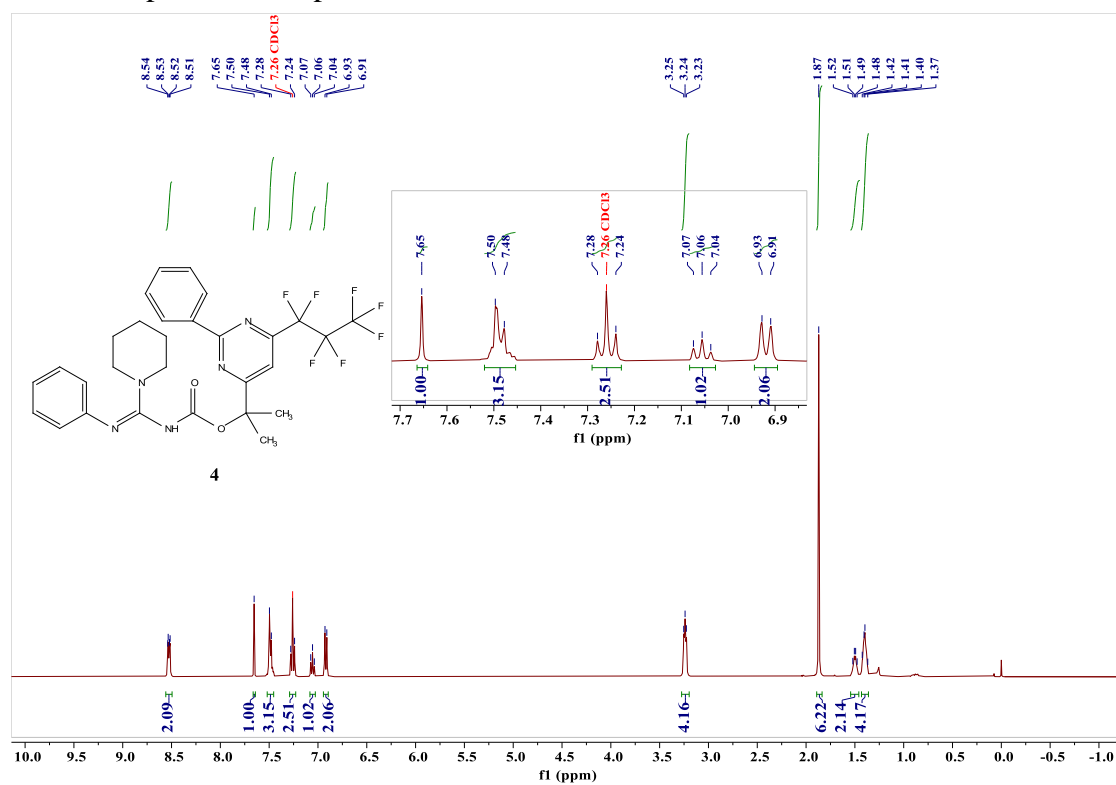

### <sup>19</sup>F NMR spectra of the product **4**

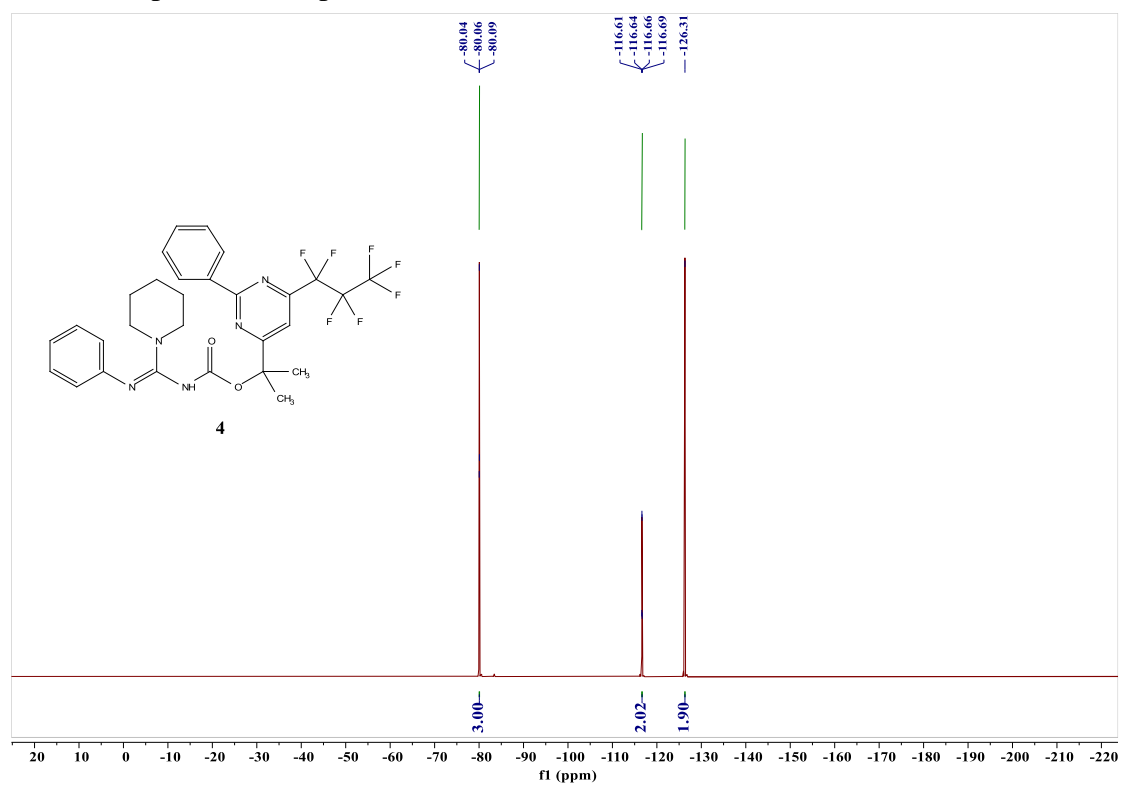

### <sup>13</sup>C NMR spectra of the product **4**

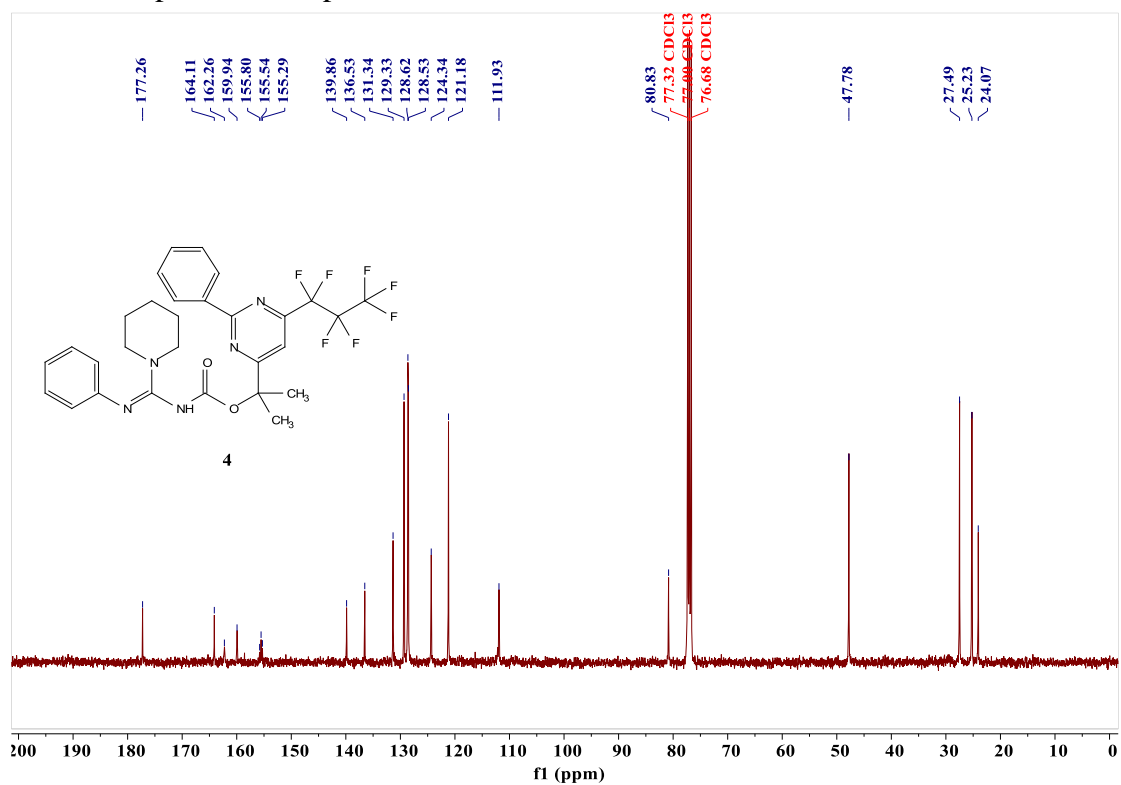

### $^1\text{H}$ NMR spectra of the product **5**

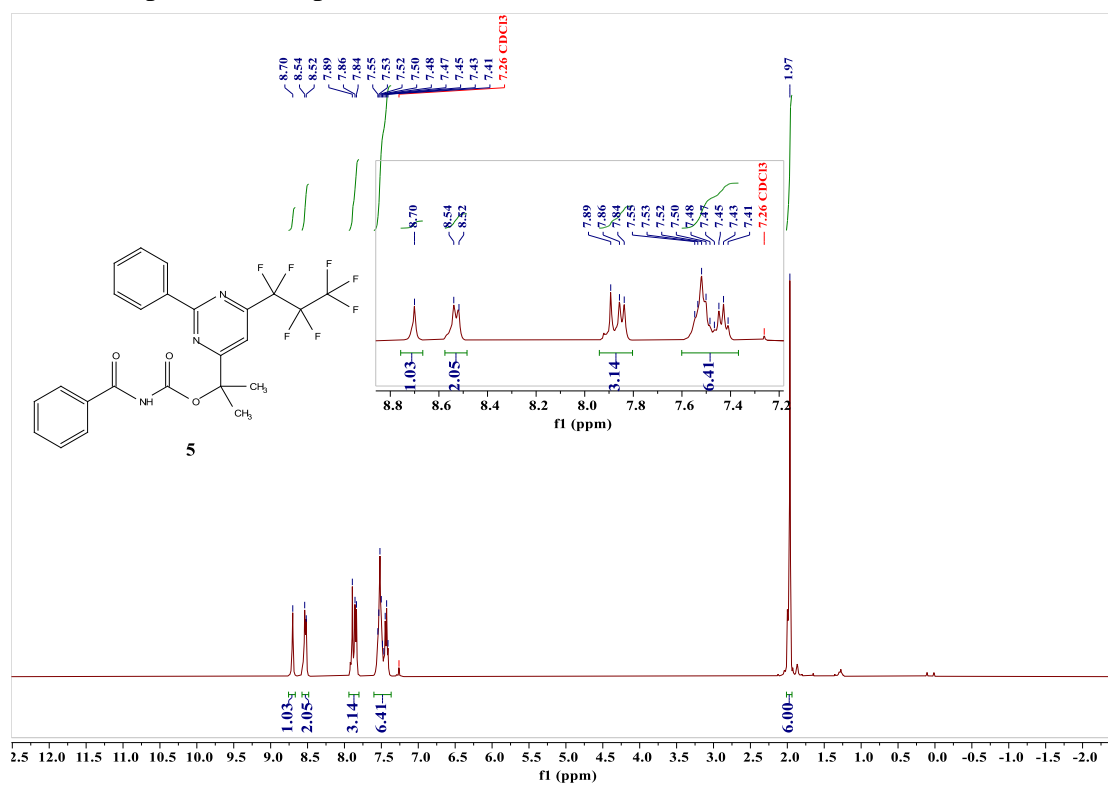

### $^{19}\text{F}$ NMR spectra of the product **5**

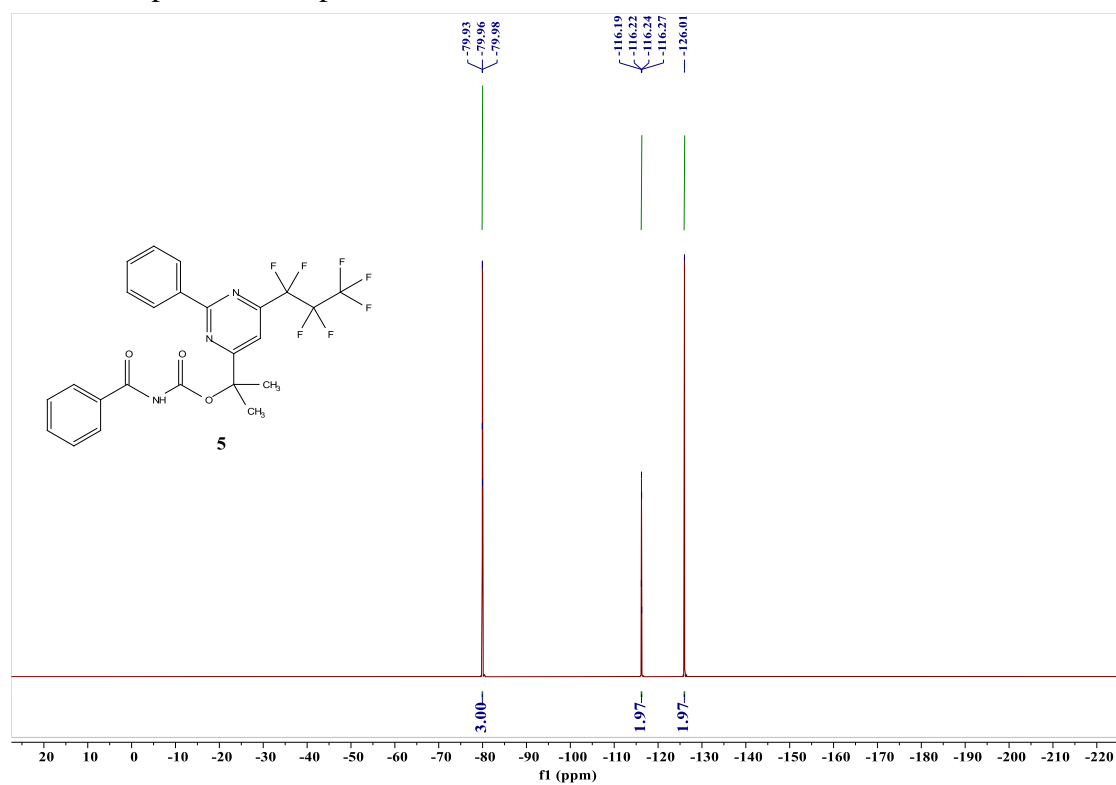

### $^{13}\text{C}$ NMR spectra of the product **5**

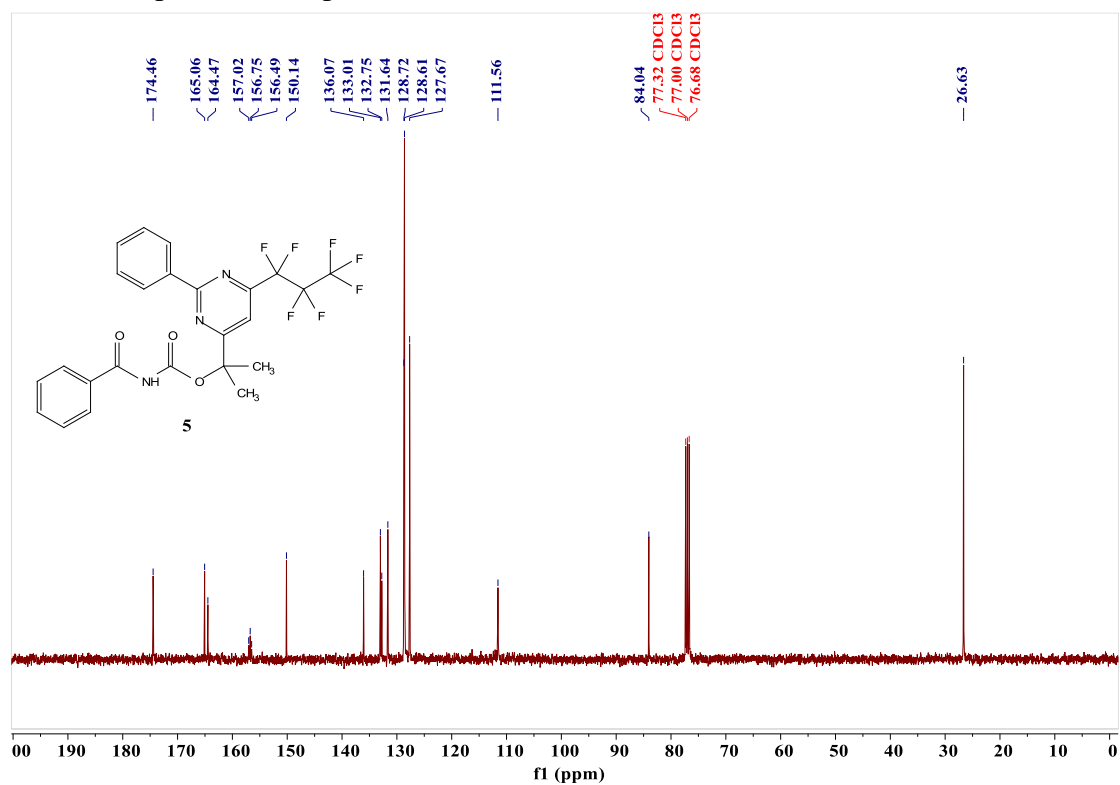

### $^1\text{H}$ NMR spectra of the product **1p**

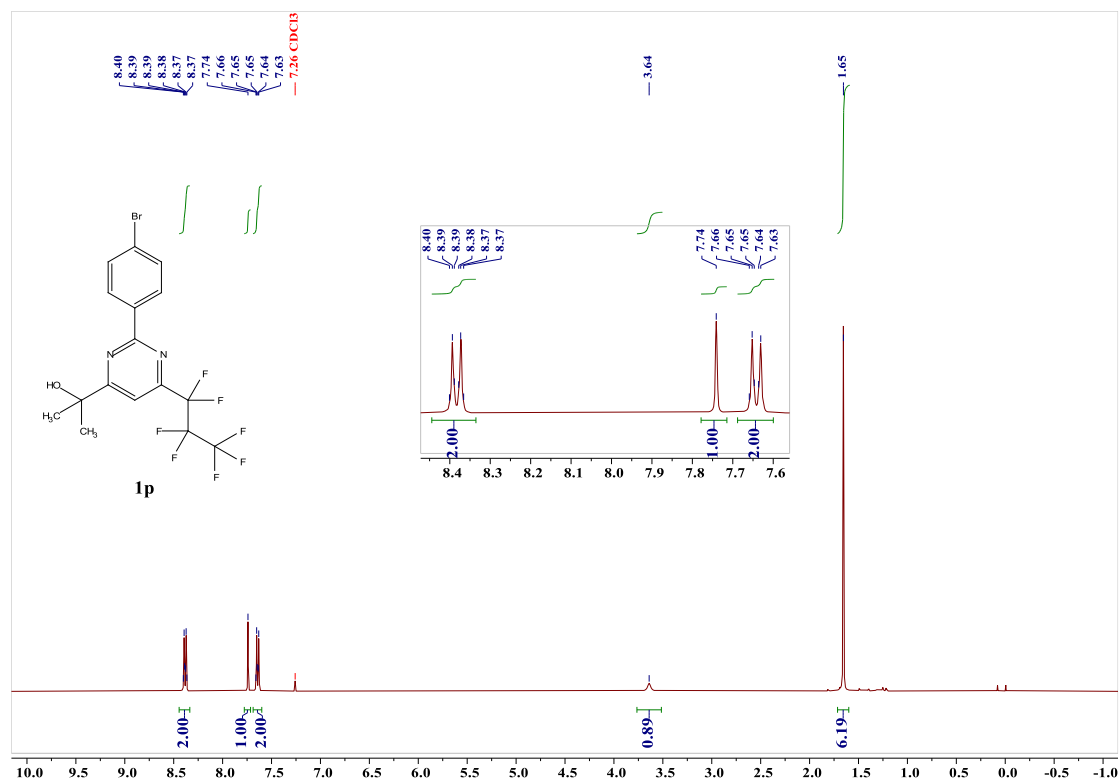

### $^{19}\text{F}$ NMR spectra of the product **1p**

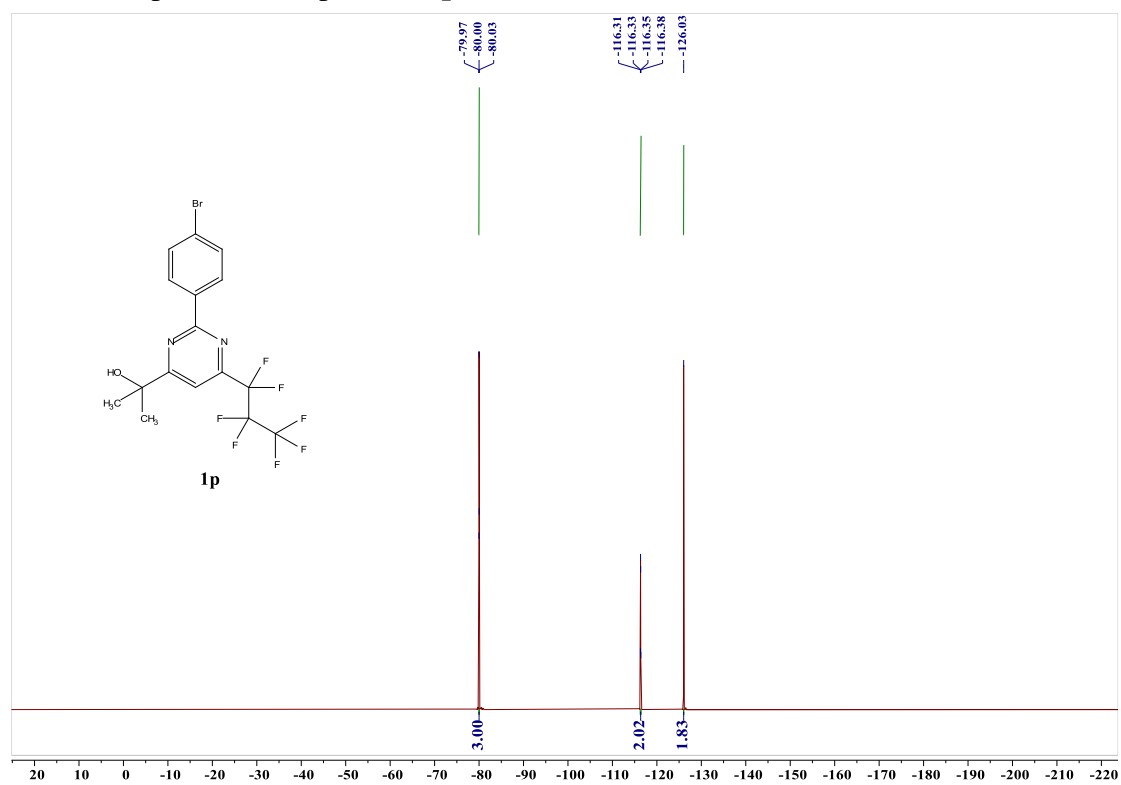

### $^{13}\text{C}$ NMR spectra of the product **1p**

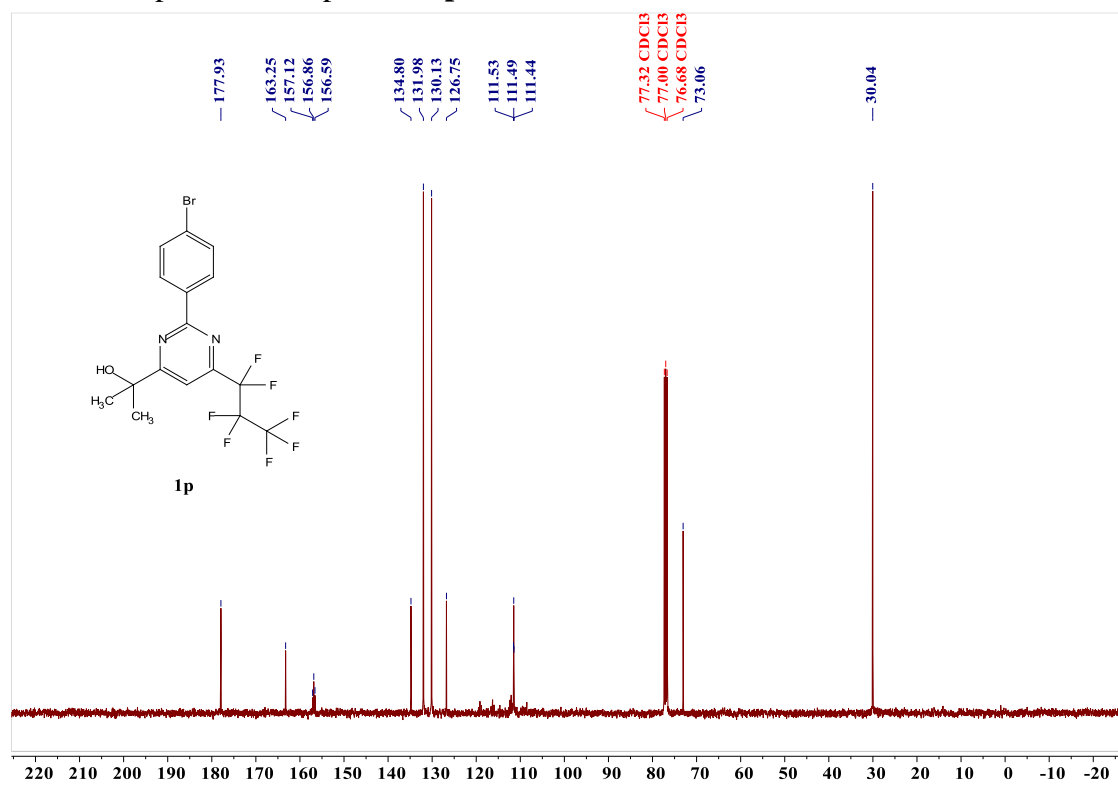

Supplement: d2gc02045a1.pdf [file d2gc02045a1.pdf]
